# Supplementary material for: FluoEM, virtual labeling of axons in three-dimensional electron microscopy data for long-range connectomics
Source: eLife journal article supplement (doi:10.7554/elife.38976), 2018-08-14
Supplement: supp [file elife-38976-supp-v1.zip]

Archive with 18 entries (18 files):
- elife_poa_e38976_Figure_1_source_data_3.xlsx
- elife_poa_e38976_Figure_6_source_data_1.xlsx
- elife_poa_e38976_Transparent_Reporting_File.pdf
- elife_poa_e38976_Figure_1_source_data_4.csv
- elife_poa_e38976_Figure_4_source_data_1.xlsx
- elife_poa_e38976_Figure_5_source_data_1.xlsx
- elife_poa_e38976_Figure_5_source_data_2.xlsx
- elife_poa_e38976_Figure_1_source_data_1.xlsx
- elife_poa_e38976_Figure_5_figure_supplement_1.pdf
- elife_poa_e38976_Figure_4_figure_supplement_1.pdf
- elife_poa_e38976_Figure_6_source_data_5.xlsx
- elife_poa_e38976_Figure_2_figure_supplement_1.pdf
- elife_poa_e38976_Figure_6_source_data_2.xlsx
- elife_poa_e38976_Figure_6_source_data_3.xlsx
- elife_poa_e38976_Figure_3_source_data_1.xlsx
- elife_poa_e38976_Figure_6_source_data_4.xlsx
- elife_poa_e38976_Figure_1_source_data_5.xlsx
- elife_poa_e38976_Figure_1_source_data_2.xlsx
