# Supplementary material for: FluoEM, virtual labeling of axons in three-dimensional electron microscopy data for long-range connectomics
Source: eLife journal article supplement (doi:10.7554/elife.38976), 2018-08-14
Supplement: supp [file elife-38976-supp-v1.zip › elife_poa_e38976_Figure_1_source_data_1.xlsx]

## Sheet: Sheet1
uniqueFraction_binDists	uniqueFraction_binFracs	ax001_dist	ax001_counts	ax002_dist	ax002_counts	ax003_dist	ax003_counts	ax004_dist	ax004_counts	ax005_dist	ax005_counts	ax006_dist	ax006_counts	ax007_dist	ax007_counts	ax008_dist	ax008_counts	ax009_dist	ax009_counts	ax010_dist	ax010_counts	ax011_dist	ax011_counts	ax012_dist	ax012_counts	ax013_dist	ax013_counts	ax014_dist	ax014_counts	ax015_dist	ax015_counts	ax016_dist	ax016_counts	ax017_dist	ax017_counts	ax018_dist	ax018_counts	ax019_dist	ax019_counts	ax020_dist	ax020_counts	ax021_dist	ax021_counts	ax022_dist	ax022_counts	ax023_dist	ax023_counts	ax024_dist	ax024_counts
0	0	1741.36	218	2490.85	200	2632.51	206	2102.94	213	2560.6	202	1341.44	220	1189.85	220	451.858	220	1224.94	220	150.848	220	2800.77	201	2413.71	210	1085.28	220	2012.84	212	2171.17	216	1121.17	219	1710.24	215	1453.58	220	2490.38	211	2638.46	206	1394.07	219	2516.74	208	2435.45	209	3194.96	204
2500	0	1819.84	218	2548.01	193	2634.32	203	2127.04	211	2586.7	202	1358.38	220	1319.75	220	569.128	220	1287.18	220	566.915	220	2824.46	196	2493.98	204	1166.59	220	2016.77	211	2290.94	215	1154.64	219	1814.41	214	1540.99	220	2583.34	211	2711.7	201	1428.6	219	2547.51	205	2580.24	205	3611.12	202
5000	1	1954.71	218	2560.11	193	2672.64	202	2279.82	208	2658.25	201	1463.67	220	1357.78	220	900.518	220	1349.8	220	688.217	220	2828.73	196	2494.19	203	1230.48	219	2112.21	211	2293.58	214	1314.92	219	1841.11	212	1623.85	219	2632.23	211	2953.68	191	1582.04	219	2760.71	197	2623.17	202	3970.18	191
7500	14	2039.75	216	2563.44	193	2680.59	201	2357.22	207	2793.04	200	1591.45	220	1505.53	219	1021.43	220	1547.92	219	939.738	220	2830.6	192	2541.98	201	1235.04	219	2116.99	211	2574.93	213	1329.81	219	2115.69	212	1750.51	218	2720.24	208	3040.63	183	1650.75	219	2834.29	192	2790.9	199	4179.16	187
10000	35	2127.85	213	2715.48	185	2765.47	197	2381.61	205	2926.01	188	1630.17	220	1677.05	217	1450.7	220	1648.62	219	1311.78	220	2839.07	191	2876.29	194	1492.04	218	2323.44	210	2614.77	212	1503.06	219	2157.77	210	1859.08	217	2742.33	207	3396.49	176	1940.85	216	2909.01	187	2807.62	198	4210.92	184
12500	63	2322.12	207	2791.68	183	2766.14	194	2508.98	202	2929.07	185	1718.97	219	1916.1	215	1517.03	220	1712.03	218	1382.47	219	2974	187	3008.94	187	1619.26	218	2333.93	207	2906.61	209	1904.36	216	2549.54	204	1925.88	216	2789.31	205	3408.64	169	2035.8	212	3201.25	177	2964.68	195	4397.62	179
15000	85	2332.39	201	2897.41	182	2864.87	191	2566.55	199	3175.07	180	1988.51	217	2159.92	212	1925.97	217	1726.94	218	1801.04	217	3009.21	180	3343.73	176	1807.95	217	2627.79	204	2977.69	203	1963.92	214	2571.64	202	1945.74	213	2901.08	201	3792.73	165	2261.02	209	3325.43	173	3058.38	191	4431.17	172
17500	109	2634.7	196	2910.37	180	2954.11	188	2628.1	198	3267.19	175	2072.53	211	2331.06	211	2161.76	214	1738.75	218	2116.22	216	3246.89	178	3397.51	168	2031.38	217	2764.43	192	3231.67	198	2462.54	210	2858.91	200	2242.52	207	2995.58	194	3816.12	156	2501.86	208	3720.02	163	3117.09	191	4585.73	165
20000	131	2668.52	186	3036.59	176	3080.51	184	2729.84	197	3701.25	168	2505.7	210	2635.55	203	2489.64	204	1956.95	215	2152.95	216	3280.34	171	3541.64	167	2056.61	211	3059.05	186	3380.06	192	2549.14	198	2940.27	194	2330.6	204	3026.71	187	4344.18	150	2728.06	198	4145.94	153	3202.59	182	4683.8	160
22500	146	2901.44	180	3159.04	167	3318.59	179	2850.29	189	3815.88	161	2793.87	192	2707.86	203	2692.09	201	2074.38	214	2664.11	212	3463.94	168	3706.01	162	2394.23	205	3498.98	177	3641.22	185	2861.35	195	3243.07	191	2620.56	201	3026.78	187	4370.08	131	3049.26	189	4293.19	135	3404.8	179	4750.47	155
25000	170	2992.84	169	3430.81	158	3369.82	174	2875.6	186	4129.81	154	2996.01	184	2993.33	191	2830.58	194	2132.49	210	3092.31	200	3784.35	162	3830.7	147	2606.9	198	3722.5	175	3721.08	159	3194.78	183	3438.46	177	2714.45	198	3035.39	185	4926.93	120	3083.81	184	4648	130	3409.89	174	4844.44	154
27500	183	3076.4	161	3564.45	153	3679.58	166	3185.44	182	4161.92	148	3259.36	172	3353.91	175	3058.79	187	2399.43	207	3254.25	184	3794.83	155	4090.63	140	2875.66	193	3773.76	161	3721.11	158	3285.28	169	3677.69	163	3058.34	188	3096.92	185	4955.31	104	3622.71	175	4804.58	115	3579.63	166	4907.88	141
30000	191	3223.69	149	3684.61	145	3828.5	160	3230	172	4490.58	145	3559.83	163	3682.64	166	3175.44	183	2431.79	207	3468.94	178	4334.8	133	4701.85	123	2904.21	189	4073.24	158	3733.18	153	3586.12	161	4025.71	150	3194.07	181	3101.71	185	5528.86	93	3717.27	167	5259.9	107	3582.04	161	4918.14	139
32500	197	3332.96	144	3864.3	138	4068.74	147	3479.41	168	4561.72	138	3762.1	148	3794.21	162	3494.05	167	2704.96	203	3834.3	170	4802.04	121	5301.01	113	3139.83	183	4567.6	142	3763.46	153	3813.44	149	4224.78	139	3509.71	171	3161.66	181	5799.26	76	3982.17	162	5906.78	83	3698.24	157	4990.95	130
35000	203	3622.43	135	4007.67	133	4238.75	142	3644.67	159	4866.12	133	3973.84	141	4013.15	154	3509.98	159	2818.92	199	4227.23	154	5103.66	113	5688.05	107	3495.03	166	4751.88	133	3822.28	145	4047.55	125	4410.88	128	3827.44	164	3225.56	175	6288.32	71	4090.42	158	5953.82	63	3935.67	155	5061.42	128
37500	208	3723.6	125	4187.05	124	4365.9	136	3886.78	154	4984.93	127	4480.08	127	4469.65	143	4005.7	141	3190.53	192	4661.14	135	5482.67	105	6009.52	106	3611.48	152	5191.2	126	3839.37	145	4243.77	117	4810.36	112	4015.21	155	3403.62	169	6712.88	62	4354.57	149	6545.27	59	3990.51	153	5152.31	122
40000	211	3901.7	123	4216.65	110	4698.82	130	4111.82	147	5584.51	111	4543.52	97	4599.03	138	4020.47	119	3295.67	177	4708.17	118	6230.73	88	6165.21	92	3889.99	143	5250.38	116	3880.04	145	4508.3	104	5030.81	96	4274.05	148	3460.84	160	6956	58	4605.44	134	7033.68	56	4023.76	138	5345.39	117
42500	214	3977.73	116	4314.02	103	4815.01	121	4384.14	133	5592.57	99	4926.34	91	5011.17	134	4485.53	104	3355.42	175	5115.61	110	6950.29	80	6362.84	85	4141.73	123	5641.06	110	4150.88	133	4668.5	90	5815.37	79	4426.59	133	3693.24	154	7416.38	54	4862.46	120	7106.9	50	4187.34	136	5551.55	108
45000	214	4258.54	112	4742.07	82	5276.19	117	4573.51	129	6114.91	93	5174.69	77	5196.08	125	4728.02	85	3589.02	167	5343.13	96	7662.23	71	6452.39	72	4240.41	114	5728.92	108	4298.36	130	4951.34	78	6076.73	63	4752.48	119	3783.44	150	7851.84	42	5286.83	110	7577.64	44	4234.05	131	5612.41	101
47500	214	4561.94	95	5010.46	70	5609.99	105	4949.31	118	6300.69	85	5360.32	72	5422.35	114	5115.01	64	3845.53	156	5893.48	84	8456.59	60	6471.69	66	4656.13	106	5823.13	96	4499.29	114	5103.93	68	6360.52	60	5048.63	107	3901.56	144	7968.27	42	5397.08	95	7609.15	44	4504.46	128	5614.17	84
50000	214	4803.71	81	5450.39	55	5827.36	86	5118.72	111	6685.78	82	5697.33	71	5607.08	107	5177.75	58	3890.98	152	5952.31	74	9071.47	56	6829.57	60	4884.46	76	6322.88	90	4523.71	110	5407.38	58	6852.05	55	5229.95	91	4181.28	139	8222.55	42	5892.46	87	7950.71	39	4585.41	117	5719.2	81
52500	214	5027.14	73	5762.06	43	5908.02	84	5385.37	107	6797.61	80	5905.93	60	5659.03	102	5611.7	53	4243.25	146	6660.11	70	9847.99	50	7010.4	48	5112.21	70	6408.39	84	5014.83	103	5596.76	52	6969.47	53	5640.77	82	4201.04	132	8656.5	41	6239.24	82	8237.3	37	4949.35	112	5787.59	77
55000	215	5141.48	63	6109.31	38	6243.47	78	5539.49	99	7377.19	73	6116.48	55	5890.75	99	5624.62	47	4261.58	138	6929.62	64	10659	47	7353.09	44	5847.27	56	7067.59	78	5166.91	82	5840.84	47	7443.5	45	5802.85	73	4415.67	124	8946.63	41	6315.25	79	8664.27	32	5127.15	104	5918.9	73
57500	215	5227.03	58	6274.86	36	6391.25	75	6121.5	92	7509.77	64	6568.01	53	5961.65	96	5971.79	44	4724.87	129	7405.91	58	11228.4	43	7751.85	34	6477.57	37	7401.93	64	5759.14	71	6229.85	39	7724.12	39	6257.76	60	4580.81	108	9212.27	39	6679.73	76	8928.75	30	5186.63	99	6124.67	70
60000	215	5424.42	52	6639.35	35	6719.83	71	6126.22	78	7953.57	60	6569.58	50	6196.37	95	6163.82	34	4796.57	118	7899.05	53	11542.3	42	8099.04	30	7372.73	25	7904.66	57	5901.63	53	6286.15	36	8050.22	34	6322.54	58	4687.33	102	9461.15	36	6995.79	63	9321.66	29	5573.52	91	6143.11	55
62500	215	5652.73	47	6851	32	6760.13	68	6540.6	72	8141	53	6870.15	48	6381.05	89	6680.68	30	5015.28	111	8223.2	47	12394.6	34	8534.68	19	7880.83	21	8066.23	54	6396.2	51	6609.74	32	8332.99	30	6887.33	45	4777.55	94	9783.17	35	7179.54	56	9426.49	27	5608.48	86	6314.9	53
65000	215	5682.23	45	6968.39	31	7019.51	63	6712.86	65	8487.79	47	7235.47	41	6649.28	84	6739.21	27	5191.45	92	8869.79	43	12999.9	31	8848.88	18	8457.66	18	8547.92	49	6417.63	43	6748.31	31	8820.53	29	7066.13	38	4981.58	90	10185.7	34	7675.18	50	10079.3	24	5982.66	79	6347.58	52
67500	216	5904.29	42	7388.17	26	7020.5	62	7095.91	60	8850.02	44	7258.99	40	6724.4	78	7045.59	25	5423.23	81	8886.96	41	13576.4	28	9251.04	15	8949.6	14	8723.56	45	6888.72	41	7089.51	26	8902.92	26	7528.45	36	4984.12	80	10447.8	30	7858.53	46	10161.6	24	6022.91	70	6472.8	51
70000	216	5917.54	37	7453.89	25	7459.65	56	7467.74	58	8937.79	38	7825.52	37	7183.49	72	7448.17	24	5546.31	71	9665.33	39	14566.6	25	9751.57	10	9158.22	14	9286.35	43	7376.8	37	7306.63	24	9731.3	23	7629.6	29	5157.01	73	10760.2	28	8284.09	42	10550.7	20	6347.38	67	6546.78	47
72500	216	6224.66	34	8246.55	23	7528.43	52	7516.34	53	9658.96	33	8214.36	35	7218.18	68	7581.99	24	5903.53	65	9752.72	38	14796.1	25	10211.3	5	9352.38	12	9334.18	40	8244.44	32	7468.62	23	9843.04	23	7931.22	26	5343.52	66	11135.4	26	8292.25	38	10569.9	20	6619.98	60	6677.01	45
75000	216	6228.25	32	8501.31	20	7845.44	49	7978	50	9738.38	32	8569.43	33	7762.67	63	7781.84	23	5993.96	55	10494.9	35	15266.4	24	10944.1	5	9791.33	12	10032.5	36	8400.49	30	7859.56	21	10357.9	22	8203.43	24	5351.35	61	11469.4	25	8836.35	37	11097.7	15	6693.07	58	6691.51	38
77500	217	6399.64	32	8661.94	20	7891.09	47	8343.2	49	10098.8	31	8919.06	32	7916.1	60	7974.01	23	6507.86	50	10593.7	30	15575.5	23	11676.1	4	10307.7	12	10093	34	8845.08	21	8004.68	20	10438.4	21	8357.77	23	5444.18	59	11901.3	25	8996.28	35	11326	13	7128.62	53	6785.79	34
80000	217	6552.94	28	9263.56	17	8185.26	47	8395.55	45	10154	28	9438.79	30	8195.18	59	8231.02	22	6717.52	48	11388.3	27	15958.2	23	12612.8	3	10911	11	10709.3	33	9291.4	20	8240.31	19	10692.5	20	8667.88	22	5480.47	58	12030.5	24	9701.65	33	11567.7	9	7298.85	51	6874	30
82500	217	6805.36	25	9311.82	16	8276.59	44	8738.92	42	10476.8	23	9596.91	27	8229.88	57	8526.61	21	7151.15	44	11549.8	24	16444.1	23	13159.9	3	12484	10	11433.3	30	9825.89	19	8481.68	17	11082.2	20	8830.46	22	5529.57	52	12425.1	24	9721.65	29	11746.5	9	7468.77	51	6904.87	27
85000	217	6808.83	23	9671.92	16	8477.04	42	8870.18	40	10624.2	22	9934.14	27	8551.62	54	8965.82	20	7333.98	40	12180.8	23	16896	21	13752.3	2	13297.2	9	11953.6	28	10281.8	18	8657.2	17	11190.3	19	9095.07	21	5606.4	51	12681.3	22	10072.2	24	12044.6	6	7721.77	46	7017.05	26
87500	217	7136.56	22	10165.3	14	8752	40	9200.84	38	10707.2	20	10236.2	24	8670.31	44	8991.06	19	7615.52	33	12210.6	23	17278.5	20	14690.2	1	14029.6	8	12060.5	22	10707.6	15	8806.19	16	11648.9	18	9464.51	19	5715.47	51	12957	21	10118.5	24	12616.5	4	7928.54	46	7165	23
90000	217	7171.04	21	10201.2	10	9122.46	39	9309.06	36	10854.3	19	10361.2	24	9108.56	42	9655.03	16	8013.91	30	12781.8	23	17650.7	20	15585.4	1	14699.2	6	12682.6	20	11095	12	9097.3	15	11736.8	17	9518.44	18	5721.36	49	13231.8	21	10711.9	20	12747.2	4	8302.18	35	7203.44	19
92500	217	7487.57	20	10631.3	9	9289.17	39	9633.17	34	11152.7	19	10653.7	23	9309.01	35	9837.56	16	8232.53	28	12866.6	21	18013.1	20	16083.8	1	15231.2	6	12932.9	17	11420	12	9494.79	15	12088.8	15	9806.03	18	5819.11	46	13462.5	20	11656.1	15	13137.3	4	8416.24	30	7279.33	19
95000	217	7498.43	17	10712.4	7	9605.62	39	9852.1	34	11447.1	17	10853.2	21	9542.35	34	10108.7	15	8736.76	26	13615	21	18509.6	19	16797.7	1	15712.1	6	13119.2	17	11675.8	12	9528.83	10	12387.4	14	10104.6	18	5938.78	41	14152.7	20	12325.1	12	13651	3	8855.89	29	7578.64	15
97500	217	7948.56	16	11126	7	9738.91	37	10336.2	32	11467.5	16	11657.3	19	9791.64	30	10157.8	15	8780.13	22	13778.1	19	19105.4	19	17426.2	1	16111.5	6	13577.9	17	12111.7	12	9903.64	9	12920.4	14	10359	18	5997.72	40	14166.1	20	13052.3	8	13743.5	3	9032.53	18	7587.98	13
100000	217	8099.66	12	11447.7	7	9850.64	37	10400.8	30	11956.3	15	11851.4	16	10117.4	29	10457.9	14	9280.93	22	14148.8	18	19406.3	18	18285.7	1	16600.5	6	13619	17	12448	12	10175.4	9	13143.6	14	10574.2	16	6006.35	38	14602.7	18	14124.3	7	14532.9	3	9288.91	18	7828.06	11
		8231.71	10	11500.4	6	10141.6	36	10736.6	28	12033.6	9	12297	14	10170.1	24	10929.9	13	9406.73	21	14591.8	18	19627.9	18	18746.2	1	17265.3	6	14066.9	16	13046.2	11	10310.1	8	13585	14	10929.9	15	6078.39	37	14969.9	17	14875.1	6	14844.6	2	9624.52	18	7904.76	11
		8423.19	10	11601.2	6	10158	36	10946.1	27	12147.8	9	12482.1	13	10605.4	24	11218.8	13	9926.54	20	14750.1	18	19984.1	18	19466.8	1	17818.9	6	14257.1	13	13484.1	10	10610.1	8	13844.7	13	10933.8	15	6092.41	37	15101.1	17	15473.7	5	15051.6	2	9904.87	18	8058.44	8
		8624.15	10	11678.1	6	10440.3	36	11209	26	12194.3	9	12927.6	12	10666.3	23	11433	13	10103.1	19	15140	18	20392.1	18	20089.5	1	18434.1	5	15016.2	11	13949.1	10	10621.9	8	14098.7	13	10996.2	15	6122.12	32	15871.9	16	15867	5	15219.7	2	10051.2	17	8200.16	8
		8791.12	9	11828.4	6	10824.2	34	11553.3	25	12209.9	9	13198.2	12	11132.8	23	12038.7	11	10519.7	19	15235.3	13	20776.1	17	20694.4	1	18918.2	5	15031.2	10	14357.5	9	10821.9	8	14544.8	9	11235.8	15	6131.7	26	15919.2	16	16195.7	5	15279.4	2	10299.3	17	8211.38	7
		9024.81	7	11999	5	10940.3	32	11764.1	25	12247.6	8	13306.4	12	11293.7	22	12264.2	9	10662.4	18	15718.5	11	20962.2	16	21115.9	1	19328.5	5	15707.7	10	15028.6	9	11113.6	7	14780.6	9	11335.1	15	6201.35	25	16590.9	15	16586.8	5	15715.1	2	10445.8	14	8356.77	5
		9219.33	6	12093.1	1	11249.8	31	12048.6	24	12254.7	8	13663.2	11	11582	22	12355	8	11015.9	18	15937.4	10	21401.1	14	21887.8	1	19640.8	4	15785.4	10	15586.8	9	11163.3	7	14965.3	9	11742.7	15	6346.06	25	16956.4	13	17161.4	4	16114.9	1	10613.4	14	8578.83	5
		9573.63	5	12107	1	11252.6	30	12280.8	21	12999.2	7	13891.5	11	11835.8	22	12817.9	8	11254.6	17	16589.9	9	21878.2	13	22499	1	20079.7	4	16163.9	10	16224.6	9	11433.8	6	15217.1	9	12029.3	14	6372.64	19	17322.1	13	17890	2	16233.7	1	10909.4	13	8596.63	5
		9601.35	3	12140.2	1	11539.9	29	12510.2	21	13522.2	5	13903.7	10	11967.6	20	13178	8	12029.9	15	16814.1	9	22197.5	13	23116.7	1	20724.2	4	16539.8	10	16712.9	8	11751.1	6	15632.5	8	12123.5	14	6378.7	18	17895.6	12	18678.7	2	16634.7	1	11130	10	8856.49	5
		9983.86	2	12318.9	1	11671.7	26	12984.3	20	14096.2	5	14264.4	10	12331.8	17	13548.8	8	12505.7	13	17214.5	8	22762.4	13	23663.1	1	21244.7	4	16801.6	9	17138.2	7	11770.6	5	15836.5	7	12364.2	14	6508.94	15	18161.1	11	19039.6	2	16669	1	11290.3	4	9021.4	5
		10278.6	2	12357	1	11835.9	26	13071.5	20	14732.9	4	14476.9	9	12397	14	13855.7	5	13423.6	12	17365.1	8	23285.1	13	24240.3	1	21915.5	4	17595.5	6	17557.5	7	11999.1	5	16484.8	7	12467	12	6563.46	12	18739.5	11	19380.9	2	17145.2	1	11305.8	4	9099.13	4
		10289.5	2	12444.1	1	12167.4	25	13306.5	20	15280.2	4	14620.1	7	12497.6	12	13977.8	5	14136.2	12	17702	8	23809.3	11	24742.4	1	22494.6	4	17813.1	4	17854.5	7	12029.5	5	16644.1	6	12654.3	11	6623.31	12	19124.9	11	19967.3	2	17240.9	1	11353	4	9206.9	3
		10630.3	2	12745.1	1	12174.4	23	13722	19	15865	4	14987.9	7	12513.4	12	14340.1	5	14844.7	12	17969.9	8	24156.3	11	25166.8	1	23107.9	3	18297.5	4	18123.5	7	12183	5	16886.9	5	12768.9	11	6832.49	10	19239.1	11	20376.6	1	17370.3	1	11531.1	4	9376.59	3
		10978.3	2	12762.6	1	12611	22	13762.3	17	16611.6	3	15010.4	7	12599.6	12	14891.6	5	15557.8	10	18566.3	7	24977.4	11	25714.6	1	23504.7	3	18586.7	4	18542.4	7	12300.1	4	17335.9	5	12796	11	6897.44	10	19754.1	9	20767.7	1	17588.5	1	11634.4	4	9506.49	3
		11149.3	2	12829.3	1	12792	22	14078.2	17	17203	3	15517.3	6	12732.3	12	14930.6	5	16262.9	10	18593.2	7	25470.3	11	26240.6	1	23969	3	19097.5	4	18995.1	7	12603	4	17426.9	5	12814.1	11	7010.81	9	20251.4	9	21143	1	17684.1	1	11798.5	4	9559.57	3
		11165	2	12868.4	1	12879.8	22	14404.1	14	17596.1	3	15653.6	6	12961.6	12	15492.8	5	16753.9	9	19343.9	7	25986.4	11	26585.1	1	24428.4	3	19191.7	4	19458.6	7	12615.5	4	18109.5	5	12998.4	11	7144.94	8	20287.6	9	21602.3	1	17930.2	1	11805.9	4	9637.48	3
		11293.5	2	13132.1	1	13484.6	20	14694.8	14	17841.5	3	16253.2	5	13057.8	12	15792.3	5	17180.7	9	19361.5	7	26493.9	11	26677.2	1	25131.7	3	19844.8	4	19893.8	7	12674.6	4	18332.3	5	13272.8	10	7255.15	8	20875.5	9	21977.4	1	18474.3	1	11815.1	4	9739.76	3
		11350.4	2	13151.3	1	13782.4	19	14907.5	14	18143.5	3	16401.6	5	13151.4	12	16154.5	5	17886.2	8	19913.2	7	27502.7	11	27144.1	1	25664.2	3	19859.9	4	20208.4	7	12910.7	3	18612.5	5	13312.9	9	7293.06	5	20968.8	9	22373.4	1	18637.9	1	11924.1	4	9746.04	3
		11442	2	13254.2	1	14053.1	17	15051	14	18445.1	3	16903.3	4	13542.7	12	16511.9	5	18551.5	6	20004.3	5	28237.7	10	27354.3	1	26066.8	3	20415.4	3	20478.6	4	13261.7	3	18891	5	13610.9	8	7423.48	5	21624.3	9	23432.7	1	18906.2	1	11930.9	4	9841.53	3
		11489.5	2	13406.2	1	14376	17	15527.7	14	18811.2	3	17001.2	4	13590.5	12	16644.6	3	19126.1	5	20279	4	29011.9	9	27984.6	1	26271	3	20764.3	3	20592.4	4	13288.2	3	19066.2	5	13886.9	7	7450.64	5	21763.4	9	23806.4	1	19197.7	1	11966.1	4	9841.76	3
		11517.9	2	13470.5	1	14435.4	16	15679	12	19331.8	3	17439.2	4	13961.6	12	17214.1	3	19467.2	5	20762.1	4	29474.9	9	28783.2	1	26541.6	3	21098.2	3	20864.8	4	13795.2	3	19572.5	3	13943.1	7	7587.28	5	22090.4	8	24350	1	19285.9	1	12067.3	4	9952.34	3
		11612.7	2	13779.5	1	14847	12	15923.2	11	19910.5	3	17455.5	4	13974.6	12	17561.7	3	19644	5	20976	4	30144	9	29728.7	1	26905.5	3	21697.3	3	21095.8	4	13850.9	3	19761.5	3	14316.1	7	7768.15	3	22091.1	7	24912	1	19430	1	12237.6	4	10108.8	3
		11646.4	2	14633.5	1	15069.3	12	16133.1	11	20548.2	3	17874.1	4	14317	12	17623	3	20069.3	5	21272.6	3	30722.8	9	30277.6	1	27160.9	3	21906.6	3	21555.2	3	14074.2	3	20164.3	3	14699.3	7	7786.86	3	22344.7	7	25183.5	1	19717.7	1	12483.5	4	10135.3	3
		11754.9	2	15363.2	1	15213.6	11	16286.8	9	21205	3	18293.2	4	14484.5	10	18085.3	3	20422	5	21980.2	3	31168.6	9	31105.3	1	27314.9	3	22388.7	3	21885.9	3	14090.7	2	20445.3	3	15059.3	7	7788.38	2	22635.5	7	25572.2	1	19964.4	1	12635.2	4	10251.4	3
		11834.7	2	15868.1	1	15668.7	11	16497.7	9	22526	3	18333.2	4	14681.6	10	18514.7	3	20875.7	3	22084.8	3	31807.2	8	32158.5	1	27373.5	3	22517.7	3	22406.9	3	14524.3	1	20828.2	3	15189.2	7	7934.88	2	22746.9	7	26259	1	20071.2	1	12869.8	3	10273.1	3
		11924.5	2	16589.2	1	15681.8	10	16542.3	8	23075.7	3	18943.2	3	14940.4	10	18615.1	3	21395.6	3	22392.9	3	32403.3	8	32606.8	1	27534.2	3	22874	3	22962.9	3	14981.6	1	21257.9	2	15394.1	5	8020.92	2	22866.6	7	27077.6	1	20270.3	1	12951.8	3	10278.3	3
		12276	2	16930.8	1	16234.7	7	16932.8	8	23426.5	3	19023.5	2	15041.1	10	19154.6	2	21660.5	2	23138.6	3	32850.7	6	32922.2	1	27744.7	3	23147.8	3	23379.6	3	15004.6	1	21433.9	2	15731.9	5	8035.7	1	23054.3	7	27571	1	20641.4	1	13203.5	3	10329.7	3
		12315.7	2	17593.4	1	16298.5	7	17130.3	6	23868.1	3	19574.6	2	15555.6	10	19278.9	2	21793.3	2	23281.9	3	33185.8	6	33197.4	1	27768.9	3	23321.4	3	23794.4	3	15435.1	1	22109.1	2	16063.1	5	8082.56	1	23089.8	7	28027.4	1	21123.2	1	13405.7	3	10394	3
		12864.1	1	18393.8	1	16600.1	7	17492.1	6	24172.8	3	19635.7	2	15582.7	10	19896.2	2	22161.6	2	23910.3	3	33610.2	6	33277.1	1	27900.8	3	23522.4	3	24507.6	3	15749.4	1	22261.6	2	16177.6	5	8135.63	1	23301	6	28711.9	1	21240.1	1	13541.1	3	10418.3	3
		12936.9	1	19059.8	1	16847	7	17691.5	6	24783.2	2	20082.8	2	15822.4	10	19942.4	2	22530.9	2	24105.9	3	34209.1	6	33598.3	1	28050.6	3	23799.2	3	24987.8	1	16119.7	1	22670.7	2	16468.9	5	8242.08	1	23358.3	6	29365.3	1	21494.5	1	13757.4	3	10511.7	3
		13348.6	1	19440.5	1	16993.9	6	18159.1	6	25316.5	2	20216.9	2	15970.1	9	20455.8	2	23001.5	2	24614.3	2	34821.2	5	33799.7	1	28070.6	3	24034.5	3	25015.1	1	16421.8	1	22797.5	2	16792.7	4	8299.45	1	23614.4	6	30259.6	1	21699.4	1	13903.6	2	10607.9	3
		13744.5	1	19695.3	1	17332.6	6	18207.4	6	25972.3	2	20601.7	2	16272.9	7	20463.8	2	23602.1	2	24664.1	2	35953.4	5	33826.2	1	28159.7	3	24411.1	3	25020.6	1	16743.2	1	23176.4	2	16823.8	4	8354.74	1	23657.7	6	30790.4	1	22029.3	1	14275.9	2	10736.7	3
		13895.6	1	20017.2	1	17662.2	6	18559	5	26662.9	2	20811.1	2	16277.8	6	20970	2	23931.3	2	25006.6	2	36528.7	4	34391.1	1	28252.4	2	24597.2	3	25142.6	1	16848.8	1	23314.4	2	17194.9	3	8451.63	1	23860.5	6	31319.1	1	22075.7	1	14330.4	2	10809.6	3
		14139.7	1	20527.6	1	17773.6	6	18858.3	5	26982.6	1	21108.6	2	16398.6	5	21014.1	2	24302.3	2	25058.5	2	36966.5	4	34833	1	28396.4	2	24885.5	3	25284.9	1	17218.1	1	23683.2	2	17197.6	3	8571.13	1	23902.6	6	31756.4	1	22285.5	1	14649.1	2	11056.8	3
		14470.6	1	21212.9	1	18263.1	6	18940.1	5	27604	1	21274.6	2	16657.7	4	21434.5	1	24819	2	25649.4	2	37579.2	4	35317.5	1	28837.5	2	24963.1	3	25289.2	1	17307.3	1	24022.7	2	17505.9	3	8659.15	1	24091.8	6	32533.8	1	22505.5	1	14905.1	2	11144.1	3
		14720.1	1	21770.8	1	18286.6	6	19309.3	5	28149.9	1	21441.1	2	16680.6	3	21452	1	25645.3	2	25763.7	2	37928.2	3	35804.5	1	28977.5	2	25584.7	3	25351.8	1	17575.4	1	24059.3	2	17663.7	3	8727.92	1	24109.1	6	33191.5	1	22568.7	1	15077.6	2	11400.7	3
		14911.2	1	22614.1	1	18750.6	4	19605.4	5	28775	1	21707.8	2	16931.2	3	21954.7	1	26468	2	26384.4	2	38450.8	3	36300.8	1	29095.8	2	25635.8	3	25370.6	1	17876.5	1	24304.3	2	17822.1	3	8962.67	1	24305.9	6	33872.9	1	22806.5	1	15189.5	2	11467.6	3
		15196.4	1	23134	1	19061.2	4	19809.6	5	29200.4	1	22035.2	2	17160.7	3	22037.7	1	27207.1	2	26455	2	39052.8	3	36706	1	29617.7	2	26215.8	3	25512.4	1	17994.7	1	24777.7	2	18107.7	3	8984.02	1	24425.2	6	34656	1	22959.5	1	15517.7	2	11694.4	3
		15579.9	1	23561.9	1	19115.9	4	20021.5	5	29941	1	22704.8	2	17238.1	3	22385.9	1	27825.6	2	26901.1	2	39532.9	3	37247.2	1	30152.6	2	26219.5	2	25514.7	1	18230.9	1	24896.2	2	18134.2	3	9115.79	1	24564	6	34968.5	1	23369.6	1	15581.1	2	11819.8	3
		15848.8	1	24535.5	1	19426.8	4	20298.7	4	30372.5	1	22724.9	2	17575.9	3	22571.6	1	28441.1	2	26932.1	2	40010.6	3	37948.7	1	30716.4	2	26828	2	25524.4	1	18674.7	1	25313.1	2	18416.8	3	9246.3	1	24566.9	6	35529.7	1	23431.2	1	15904.4	2	11932.8	3
		15984.3	1	25166.8	1	19682.1	4	20712.2	4	30753.7	1	23260.2	2	17790.4	3	23035.8	1	28998	2	27438.7	2	40573.5	3	38482.1	1	31233.2	2	27235.1	2	25574.1	1	18712.2	1	25654.2	2	18575.9	3	9368.79	1	24765.3	6	36135.4	1	23804.9	1	16053.4	2	12184.9	3
		16197.3	1	26066.8	1	19814.8	4	20870.6	4	31187.1	1	23352.9	2	17812	3	23095.2	1	29630.7	2	27517.4	2	41137.6	3	38921.4	1	31620	2	27254.5	1	25613.4	1	19281.6	1	25712.6	2	18731.8	3	9409.01	1	24822.2	6	36641.2	1	24087.3	1	16321	2	12196.4	2
		16291.3	1	27141.6	1	20010.9	4	21237	4	31735.1	1	23635.2	2	18096.4	3	23363.9	1	30339.5	2	28222.8	2	41584.1	3	39482.6	1	32033.4	2	27685.4	1	25621	1	19350.5	1	26261.4	2	19017.9	3	9471.06	1	24994.5	5	36783.8	1	24368.6	1	16537.4	2	12367.2	2
		16537	1	27798.8	1	20424	4	21367.4	4	32113.2	1	23986.3	2	18180.3	3	23576.9	1	30831.6	2	28241.8	2	42047.9	3	39829.7	1	32798.2	2	28015.4	1	25903.8	1	19635.4	1	26310.7	2	19236.6	2	9603.64	1	25056.1	5	37392.6	1	24504.2	1	16727.8	2	12556.1	2
		16598.9	1	28874.8	1	20450.4	4	21915.3	4	32526.2	1	24022.7	2	18447.5	3	23829.7	1	31435	2	28886.8	2	42607.7	3	40578	1	33110.8	2	28247.3	1	25916.3	1	19675.9	1	27003.7	2	19274.5	2	9637.74	1	25195.7	5	38000.8	1	24635	1	17101.6	2	12650.5	2
		16820.8	1	29633.1	1	20909.4	4	21975.2	4	33175.8	1	24374.1	2	18722.4	3	23938.5	1	31923.6	2	28956.4	2	43172.2	3	41330.7	1	33703.2	2	28737.2	1	25928.9	1	19964.4	1	27148	2	19568.9	2	9640.22	1	25256	5	38376.1	1	25009.4	1	17264	2	12695.4	2
		17127.9	1	30159.8	1	20945	3	22478.6	4	33804.5	1	24756.8	2	18809.3	3	24517.6	1	32416.8	2	29248.5	2	43679.9	3	42035	1	34142.2	2	28986.3	1	25931.4	1	20027.6	1	27602.5	2	19868.5	2	9706.94	1	25394.6	5	38628.4	1	25054.7	1	17538.1	2	12925.9	2
		17150.7	1	30168.5	1	21354	3	22577.4	4	34549	1	25275.4	2	19041.7	3	24795.1	1	33020.7	2	29434.3	2	43991.9	3	42828.7	1	34591.7	2	29455.4	1	26019	1	20183.6	1	27969.9	2	19954.2	2	9734.77	1	25435.3	5	39185.9	1	25087.1	1	17844.8	2	13120.9	2
		17364.7	1	30195	1	21824.4	3	22844.3	4	35088.3	1	25570.9	2	19301.7	3	25048	1	33766.8	2	29758.7	2	44362.9	3	43587.7	1	35299.3	2	29580.8	1	26116.1	1	20406.3	1	28146.9	2	20209.1	2	9934.96	1	25583	5	39713.9	1	25295.8	1	17861.3	2	13181.6	2
		17416.4	1	30346.9	1	21843.5	3	23217.4	4	35717.4	1	25929.6	2	19571.6	3	25250.6	1	34624.1	2	30095.1	2	45165	3	44449.5	1	35752.7	2	29965.1	1	26338.8	1	20501.8	1	28517.3	2	20364.6	2	9957.66	1	25616.1	5	40378.6	1	25357.3	1	18218.5	2	13451.7	2
		17621.4	1	30372.8	1	22242.7	3	23404.8	3	36170.4	1	26040.2	2	19613.4	3	25918.1	1	35392.8	2	30317.2	2	45768.5	3	45207.4	1	36197	2	29982.5	1	26727.4	1	20817.7	1	28592.4	2	20507	2	10026.6	1	25790.9	5	41110.6	1	25753.2	1	18386.1	2	13576.4	2
		17729.3	1	30723.6	1	22543.1	3	23742.2	2	36590.7	1	26407.5	2	19644.9	3	26057.7	1	35747.5	2	30708.8	2	46838.2	3	46372.9	1	36869.3	2	30628.5	1	27061	1	20988.9	1	29197.4	2	20542	2	10146	1	25807.7	4	41724.6	1	26144.4	1	18616.4	2	13726.8	2
		18109.8	1	30817.5	1	22600.9	3	23841.8	2	36973.5	1	26637.5	2	19776.3	3	26349.9	1	36129.7	2	30887.3	2	47402.5	3	47065.1	1	37291	2	30744.8	1	27621	1	21374.5	1	29273.2	2	20816.1	2	10180.8	1	25891.4	4	42046.1	1	26406.8	1	18721.4	2	13967.7	2
		18229	1	30871.6	1	22855.9	3	24188.2	2	37491.6	1	27114.9	1	20071.4	3	26455.6	1	36713.3	2	31085	2	48048.8	3	47983.9	1	37897.6	2	31270.4	1	28377.9	1	21686.4	1	29581.7	2	20902.9	2	10356.1	1	25994	4	42782.2	1	26710.3	1	18923.9	2	14041.9	2
		18529.3	1	31179.5	1	23255.2	2	24386.7	2	37847.2	1	27272.1	1	20117.9	3	26826.2	1	37215.3	2	31455.3	2	48469.5	3	48485.5	1	38415.4	2	31573	1	29186.4	1	21778.5	1	29886.9	2	21113.8	2	10430.4	1	26140.9	4	43472.7	1	26822.4	1	19010.4	2	14246.9	2
		18578.9	1	31293	1	23662	2	24479.6	2	38378.6	1	27762.4	1	20603	3	26948.4	1	37848.8	2	31463.8	2	48998.6	3	48563	1	38889.6	2	31742	1	29411.4	1	22268.5	1	30357.4	2	21304.9	2	10598.5	1	26162.3	3	43607.8	1	27127.8	1	19301.3	2	14522.9	2
		18831.9	1	31583.9	1	23802.3	2	24832.8	2	39103.9	1	27964	1	20717.7	3	27340.1	1	38290.5	2	31833.7	2	49742.2	3	48925.4	1	39226.8	1	32234.5	1	29468.3	1	22278.3	1	30733.7	2	21480.3	2	10687.6	1	26296.7	3	43666.4	1	27230.4	1	19381.6	2	14725.9	2
		19039.6	1	31669.6	1	24200.3	2	25140.6	1	39675.6	1	28358.3	1	21019.9	3	27577.8	1	39005.4	2	31997.7	2	50290.4	3	48951	1	39545.3	1	32269.1	1	29601	1	22631.5	1	30783	2	21538.7	2	10864.2	1	26369.1	3	43688.8	1	27587.8	1	19741.3	2	15009.6	2
		19158.5	1	31764.5	1	24465.8	2	25293.4	1	40335.8	1	28728.7	1	21344.2	3	27767.8	1	39329.5	1	32375.6	2	50679.5	3	49311.9	1	39879.2	1	32986.5	1	29904.3	1	23003.7	1	31383.5	2	21728.1	2	10931.3	1	26567	3	43733.9	1	27952.2	1	19844.6	2	15140.1	2
		19388.3	1	31856.8	1	24747.9	2	25737.7	1	40670.1	1	29136.4	1	21592.6	3	28002.6	1	39876.8	1	32425.3	2	51102.7	3	49525	1	40013.9	1	33022.6	1	30206.6	1	23010.7	1	31520.4	2	21804.8	2	11061.7	1	26615	3	44105.8	1	27976.7	1	20206	1	15491.1	2
		19489.6	1	32217.7	1	24990.2	2	25801	1	41312	1	29641.3	1	21808.6	3	28294.3	1	40089.1	1	32923.1	2	51619.5	3	50051.2	1	40386.6	1	33690.9	1	30502.8	1	23510.4	1	31774.5	2	21962.3	2	11103.5	1	26773.7	3	44746.7	1	28418.1	1	20332.4	1	15532.8	2
		19725.4	1	32245	1	25279.3	2	26306.2	1	42079	1	29688.2	1	22315.2	3	28551.4	1	40860.3	1	33128.2	2	52283.6	3	50670	1	40737.8	1	33904.4	1	30897.1	1	23626.3	1	32255.8	2	22195.6	2	11363.3	1	26830.7	3	45176.1	1	28604.5	1	20580.4	1	15914.2	2
		19887.4	1	32372.7	1	25508.5	2	26425.2	1	42806.6	1	30245.7	1	22388.9	2	28974.9	1	41115.8	1	33475.6	2	52788.8	3	51317.9	1	40920.5	1	34220.5	1	31008.1	1	23976.7	1	32347.5	2	22563.2	2	11437.4	1	27036	3	45319.9	1	28939.2	1	20814	1	16060.5	2
		19979.2	1	32381.1	1	25590	1	26824.2	1	43700.9	1	30670.6	1	22881.8	2	29316.9	1	41592.5	1	33498.7	2	53251.9	3	51490.5	1	41242.9	1	34525.8	1	31260.4	1	24475.9	1	32832	2	22613	2	11453.1	1	27133.9	3	45335.6	1	29243.6	1	21053.5	1	16288.8	2
		20312.6	1	32691.3	1	25992.3	1	27055.6	1	44583.6	1	30833.3	1	23034.6	2	29513	1	42322.8	1	33868.1	2	53706.1	3	51786.1	1	41649.2	1	34678.1	1	31925.9	1	24591.2	1	33029.4	2	22833.4	2	11602	1	27281.8	3	45342.2	1	29288.3	1	21537	1	16422.4	2
		20471	1	32898.6	1	26084.2	1	27207.6	1	45016.1	1	31320	1	23253.5	2	29897.8	1	43015.3	1	33939.2	2	54576.6	3			42127.9	1	35348.6	1	32351.1	1	25118.9	1	33226.6	2	23052.1	2	11778.6	1	27467.8	3	45837.4	1	29682	1	21679.9	1	16588.7	2
		20513.4	1	32952.3	1	26424.4	1	27630.8	1	45501.2	1	31468.4	1	23777.4	2	29953.5	1	43544.3	1	34395.6	2	54674.7	3			42451.4	1	35385.5	1	32498.7	1	25176.7	1	33715.1	2	23112.2	2	11872.8	1	27512.8	3	46220.9	1	30083.2	1	21837.1	1	16807.3	2
		20794.8	1	33101.4	1	26659.9	1	27725.1	1	45850.2	1	31764.6	1	23918.4	2	30283.2	1	44129.4	1	34855.5	2	54964.8	2			42825.1	1	36011.2	1	32519.4	1	25603.8	1	33723.4	2	23396.1	2	11979.7	1	27735.6	3	46915.1	1	30151.2	1	22042.8	1	17045.5	1
		21070.1	1	33211.8	1	26803.1	1	28073	1	46345.9	1	32050.2	1	24260.9	2	30783.3	1	44415.4	1	34971.7	2	55429.1	2			43147	1	36178.9	1	32526.7	1	25796.5	1	34037.5	2	23610.9	2	12110.5	1	27767.3	3	47340.2	1	30290.1	1	22265.1	1	17183.9	1
		21083.8	1	33483.7	1	26982.7	1	28083.7	1	46790.4	1	32101.3	1	24620.6	2	30979.9	1	45193.3	1	35508	2	55902.5	2			43439.9	1	36429.2	1	32628.3	1	26072.6	1	34232.8	2	23788	2	12144.6	1	27926.3	3	48103.7	1	30678.9	1	22639.5	1	17427.2	1
		21238.9	1	33493.6	1	27352.6	1	28731.5	1	47199.7	1	32550.7	1	24845.8	2	31341.8	1	45632.6	1	35542.8	2	56373.3	2			43737	1	36877.5	1	33261.1	1	26432.6	1	34380.1	2	24167.9	2	12284.2	1	27990.5	3	49023.9	1	31121.6	1	22674.4	1	17473.5	1
		21261.7	1	33653.2	1	27611.8	1	28876.9	1	47619.5	1	32739.3	1	25115.9	2	31518.4	1	46036	1	35981.8	1	56835.7	2			44023.8	1	36937.8	1	33878.5	1	26502.9	1	34750.5	2	24285.6	2	12388.8	1	28056	3	49441.8	1	31519.5	1	23258	1	17751.5	1
		21319.3	1	33662	1	27963.5	1	29301	1	48189.6	1	33315.5	1	25138.8	2	31553.5	1	46367.4	1	36178.1	1	56992	2			44319	1	37676.7	1	34434.6	1	26974.9	1	35103.7	2	24506.5	2	12391.7	1	28255	3	49896	1	31583.6	1	23798.8	1	17781.8	1
		21331.8	1	33752.8	1	28265	1	29523.2	1	48879.8	1	33573.5	1	25563.5	2	32475.4	1	46866.3	1	36448.7	1	57085.6	2			44643.7	1	37688.3	1	35235.7	1	27398.5	1	35628.1	2	24656.9	2	12430.1	1	28266	3	50711.7	1	31634.9	1	23819.3	1	17870.5	1
		21337.5	1	33787.1	1	28655.5	1	29742.6	1	49342.6	1	33963.1	1	25815.3	2	32613.4	1	47124.1	1	37007.2	1	57336.4	2			45000.2	1	38007.1	1	35913.7	1	27641.1	1	35868.1	2	24941.3	2	12469.9	1	28389.4	3	51304.2	1	31759.5	1	24099.5	1	17995.9	1
		21348.5	1	34129.7	1	29019.6	1	30031.6	1	49807	1	34171.4	1	26326.3	2	32970.7	1	47498.2	1	37119	1	57954.6	2			45401.6	1	38335	1	36754	1	27995.5	1	36422.5	2	25089.5	2	12593.4	1	28389.5	3	51718.1	1	32067.4	1	24509.5	1	18081.4	1
		21356.9	1	34267	1	29090.1	1	30328.9	1	50436.9	1	34273	1	26329.9	2	33308	1	47684.4	1	37276.4	1	58511.8	2			45827.6	1	38629.6	1	37112.3	1	28610.8	1	36444.5	2	25352.5	1	12617.9	1	28392.6	3	51954	1	32308.2	1	24768.1	1	18123.1	1
		21378.9	1	34267.1	1	29554.4	1	30418.3	1	51056.8	1	34645	1	26838.2	2	33717.2	1	48094.2	1	37857.1	1	59097.6	2			46311.5	1	39090	1	37885.9	1	28715.2	1	37086.1	2	25544.3	1	12836	1	28398.5	3	52327.2	1	32414.4	1	24983.8	1	18260.8	1
		21382.6	1	34587.3	1	30036.4	1	30959.6	1	51342.9	1	35025.9	1	27001.8	2	33842.6	1	48512.2	1	37898.8	1	59604.3	2			46696.3	1	39193	1	38392.9	1	29289.9	1	37187.6	2	25701.9	1	12876.2	1	28434.5	3	52950.2	1	32839.5	1	25194.6	1	18534	1
		21406.2	1	34736.5	1	30431.2	1	31038.6	1	51960.8	1	35027.6	1	27417.6	2	34046.3	1	48960.2	1	38361.6	1	60274.8	2			46987.5	1	39606.8	1	39150.9	1	29356.2	1	37559.3	2	26018.8	1	12939.1	1	28438.9	3	52951.9	1	32930.5	1	25498.8	1	18852.2	1
		21416.6	1	34762.5	1	30482.5	1	31224.4	1	52700.5	1	35392.4	1	27772.8	2	34451	1	49253.5	1	38500.3	1	60857.6	2			47028.9	1	39686	1	39593.6	1	29820.4	1	38133.1	2	26039.4	1	12975.5	1	28450.3	2	52995.7	1	33273.6	1	25832.9	1	19071.1	1
		21425.1	1	34934.3	1	30806.4	1	31704	1	53137.6	1	35441.4	1	27848.9	2	34495.6	1	50054.3	1	38647.4	1	61282.8	2			47504.2	1	40143.6	1	40342	1	30078.8	1	38403	2	26386.9	1	13106.8	1	28484.5	2	53159.3	1	33467.8	1	26006	1	19083.3	1
		21433.6	1	35269.5	1	31307.7	1	31959.1	1	53626.5	1	35988.8	1	28493.5	2	34635.1	1	50659.2	1	38949.2	1	61818.1	2			47895.4	1	40377.4	1	40820.6	1	30362.8	1	38732.2	2	26695.7	1	13246.7	1	28644	2	53289	1	33914.4	1	26482	1	19088.5	1
		21439.6	1	35465	1	31461.1	1	32040.1	1	54092.5	1	36092.2	1	28515.3	2	35113.6	1	51236.5	1	39221.6	1	62437.3	2			48160.5	1	40529.1	1	41503.8	1	30763.7	1	39088.2	2	26738.4	1	13350	1	28645.7	2	53540.6	1	34245.9	1	26650.5	1	19098.1	1
		21489.2	1	35499.6	1	31800.6	1	32634.1	1	55036.1	1	36328.2	1	28864.4	2	35191.1	1	52106.3	1	39472.6	1	62946.4	2			48581.4	1	40967.3	1	42227.6	1	30970	1	39581.4	2	27127.5	1	13420.7	1	28661	2	53555.5	1	34406	1	26912.3	1	19109.1	1
		21580.4	1	35825.7	1	32028.9	1	32888.1	1	55509	1	36603.5	1	28866.4	2	35583.5	1	52829.3	1	40115.5	1	63472.2	2			49256.4	1	41164	1	42704.8	1	31392.3	1	39744.3	2	27152.9	1	13532.7	1	28745	2	53563.8	1	34725.8	1	27305.8	1	19155.5	1
		21634.1	1	35989.8	1	32490.9	1	33167.4	1	56072.3	1	36863.5	1	29326.4	2	35688.6	1			40161.4	1	63809.1	2			49830.9	1	41471.4	1	43426.7	1	31415.7	1	40509.6	2	27493.6	1	13567.5	1	28791.2	2	53658	1	34760.3	1	27319.7	1	19190.4	1
		21708	1	36084.9	1	32615.5	1	33537.5	1	56489.8	1	37020.9	1	29631.2	2	35986.8	1			40745.1	1	64308.6	2			50438.7	1	41605.6	1	43995	1	31735	1	40575.2	2	27686.9	1	13575	1	28932.1	2	53669.6	1	35003.5	1	27623.4	1	19201.2	1
		21769.6	1	36260.6	1	33213.3	1	33665.1	1	57093	1	37159.6	1	29912.2	2	36029.7	1			40745.2	1	64797.2	2			50740.8	1	41888	1	44650.3	1	31889.9	1	41083.6	2	27895.7	1	13619.4	1	28977.5	2	53851.3	1	35335	1	27743.8	1	19271.6	1
		21883.7	1	36369.1	1	33249.5	1	34306.2	1	57655.6	1	37635.4	1	30273.1	2	36334.7	1			41154.7	1	65270.2	2			51267.4	1	42141.2	1	45050.4	1	32409.5	1	41353.4	2	28206.6	1	13750.7	1	29015.4	2	53858.1	1	35479	1	28225.4	1	19299.1	1
		21940.5	1	36682.5	1	33426.1	1	34356.1	1	58181.1	1	37999.5	1	30490.3	2	36624	1			41189.5	1	65955.3	2			51776.7	1	42390.5	1	45668	1	32583.6	1	41825.3	2	28337.6	1	13758	1	29147.5	2	54035.8	1	35796.7	1	28310.9	1	19310.4	1
		22030.9	1	36741.7	1	34001.8	1	34651.2	1	58578.8	1	38400.6	1	30954.6	2	36753.2	1			41691.5	1	66452.4	2			52193.6	1	42827.6	1	46065.2	1	32876.3	1	42078.4	2	28554.4	1	13938.3	1	29185	2	54050.8	1	35996.1	1	28754.4	1	19315.5	1
		22057.3	1	36799.9	1	34068.4	1	34976	1	58955.1	1	38683.4	1	31191.9	2	37012.7	1			41885.5	1	67326.7	2			52590.1	1	43049.3	1	46570.3	1	33031	1	42450.7	2	28893.1	1	14029.4	1	29195.5	2	54062.9	1	36186.3	1	28918.7	1	19343.9	1
		22078.5	1	37002.7	1	34714.6	1	35121.8	1	59311.5	1	38918.7	1	31850.1	2	37381.8	1			42442.1	1	67685.8	2			53083	1	43661.8	1	47300.5	1	33284.3	1	42621.2	1	29050.6	1	14075.1	1	29256.6	2	54085.4	1	36291.7	1	29061.8	1	19359.8	1
		22111.4	1	37007.2	1	34773.6	1	35532.7	1	60079.6	1	39209.9	1	31936.4	2	37490	1			42508.4	1	68482.7	2			53593.8	1	43864.2	1	47876.7	1	33442	1	43056.2	1	29184.3	1	14225.6	1	29330	2	54132.3	1	37034.5	1	29291.2	1	19442	1
		22127.1	1	37027.5	1	35230.5	1	35629	1	60634.6	1	39391.2	1	32176.6	1	37957.2	1			42910.3	1	69271.6	2			53993.1	1	44142.5	1	48690.3	1	33663.8	1	43339.3	1	29499.2	1	14344.8	1	29366.2	2	54136.5	1	37240.1	1	29363.4	1	19475.1	1
		22157.9	1	37051.9	1	35372.5	1	35859.1	1	60948.5	1	39794.1	1	32754	1	37977.8	1			43276.1	1	70146.4	2			54308.2	1	44581.1	1	49191.1	1	33925	1	43736.7	1	29550.4	1	14465.9	1	29381.4	2	54202.5	1	37955.2	1	29707.2	1	19493.7	1
		22204.2	1	37127.6	1	35596.7	1	36230.1	1	61240.8	1	40075.6	1	32939.6	1	38299.6	1			43319.4	1	70830	2			54692.8	1	44833.5	1	49868.8	1	34118.9	1	44036.7	1	29863.1	1	14618	1	29389.4	2	54240.9	1	37969.9	1	29757.8	1	19498.5	1
		22271.6	1	37186.5	1	35811	1	36565.9	1	61517.8	1	40506.6	1	33384.3	1	38534.6	1			43571	1	71437.8	2			55044	1	45416.9	1	50610.7	1	34307.9	1	44376.7	1	29938.5	1	14676.4	1	29401.2	2	54385.8	1	38596.1	1	29902	1	19501.2	1
		22306.6	1	37224.4	1	36157.4	1	36649.8	1	62180.9	1	40723.4	1	33580.8	1	38557.3	1			43952.7	1	72055.3	2			55346.2	1	45474.6	1	51367.7	1	34374	1	44685	1	30033	1	14691.5	1	29463.5	2	54669	1	38752.4	1	30295.1	1	19522.4	1
		22373.2	1	37281.3	1	36384.4	1	37084.2	1	62616.1	1	41141.7	1	33995.8	1	38846.1	1			44086.2	1	72748.3	2			55767.7	1	45597.5	1	51896	1	34675.8	1	44950.4	1	30231.3	1	14694.9	1	29627.6	2	55110.2	1	38872.3	1	30660.5	1	19528.3	1
		22532.9	1	37371.3	1	36436.6	1	37719.7	1	63419.2	1	41284.5	1	34054.5	1	39008.1	1			44590.4	1	73574.6	2			56174.6	1	46122.6	1	52651	1	34678.3	1	45421.7	1	30358.3	1	14870.5	1	29655.5	2	55474.2	1	39088.2	1	30780.2	1	19539.7	1
		22589.4	1	37594.9	1	36769.3	1	37782.6	1	63928.6	1	41503.9	1	34560.2	1	39466.1	1			44710.3	1	74339	2			56399.5	1	46281.4	1	53251.7	1	34987.4	1	45554.2	1	30580.5	1	14975.3	1	29743.4	2	55970.8	1	39295.3	1	31039	1	19555	1
		22843.1	1	37659.5	1	36981.6	1	38353.3	1	64647.6	1	41909	1	34722.8	1	39702.1	1			45273.3	1	75220	2			56892.3	1	46699.9	1	53886.6	1	35137	1	46072.2	1	30709.7	1	15122.8	1	29840.8	2	56350.7	1	39569	1	31252.3	1	19566.2	1
		22883	1	37808.5	1	37304.4	1	38594.6	1	65096.9	1	41972	1	35078.6	1	39960.2	1			45444.9	1	76073.4	2			57413.2	1	47338.5	1	54554.7	1	35342.3	1	46095.1	1	30854.4	1	15281.9	1	29924.9	2	56940.3	1	39867.6	1	31567.5	1	19569.6	1
		22899.9	1	38077.4	1	37505.8	1	39076.8	1	65755.9	1	42492.2	1	35115.9	1	40195.9	1			46142.3	1					57798.8	1	47579.1	1	55239.2	1	35487.4	1	46582	1	31117.7	1	15289.8	1	30101.8	2	57706.1	1	39956.5	1	31743.5	1	19577.6	1
		23134.9	1	38119.6	1	37871.7	1	39097.8	1	66226.8	1	42835.7	1	35617.1	1	40418	1			46536.1	1					58179.8	1	48045.6	1	55884.7	1	35562	1	46707.2	1	31172.4	1	15369.3	1	30107.9	2	58131.7	1	40263.7	1	32318.4	1	19606.6	1
		23219.2	1	38135.3	1	37889.5	1	39268.3	1	67163.1	1	43348.8	1	35906.8	1	40611.1	1			46768.5	1					58657.1	1	48327.3	1	56241	1	35642.3	1	47266.2	1	31569.4	1	15468.8	1	30300.4	2	58664.6	1	40353.5	1	32538.2	1	19628.7	1
		23314.2	1	38153.8	1	38439.3	1	39454.9	1	67735.9	1	43732.9	1	36223.2	1	40776.2	1			47277.3	1					58887.9	1	48795.5	1	57183.1	1	35955.8	1	47355.4	1	31681.6	1	15615	1	30384	2	59053.1	1	40649.2	1	32821.9	1	19659.4	1
		23533	1	38200.8	1	38491.4	1	39660.3	1	68271.6	1	43908.3	1	36548.6	1	40967.9	1			47537.7	1					59353.7	1	48900.7	1	57773.1	1	36183.5	1	47787	1	32471.8	1	15792.4	1	30571.5	2	59398	1	40692.4	1	32852.9	1	19677.7	1
		23669.5	1	38454.3	1	38912.3	1	39699.3	1	68973.7	1	44495.3	1	36786.7	1	41195.9	1			47730.7	1					59667.1	1	49152.3	1			36322.9	1	48002.3	1	32990.7	1	15794.2	1	30629.5	2	59844.2	1	40973.3	1	33115.5	1	19699.2	1
		23753.2	1	38574.7	1	39299.5	1	39925.5	1	69656.8	1	44551.1	1	36991.8	1	41771.6	1			48200.1	1					59999.7	1	49445.9	1			36660.9	1	48479.4	1	33455	1	15845.1	1	30666.8	2	60538.2	1	40987.7	1	33242.9	1	19706.6	1
		24007	1	38828.2	1	39368.3	1	40017	1	69940.3	1	45103.5	1	37425	1	41784.1	1			48491.6	1					60434.5	1	49896.6	1			36986.1	1	48501.6	1	33808.1	1	16029.3	1	30787.9	2	60924.7	1	41240.9	1	33324.8	1	19733.4	1
		24060	1	38922.3	1	39712.1	1	40335.5	1	70433	1	45306.2	1	37590.4	1	42290.8	1			48841.7	1					60933.2	1	49920.7	1			37037.8	1	48736	1	34008.4	1	16156.7	1	30863.1	2	61421.3	1	41344.7	1	33643.6	1	19762.1	1
		24125.5	1	39030.1	1	40158.7	1	40567.7	1			45660.7	1	38019.5	1	42497.2	1			49138.6	1					61310.6	1	50344	1			37299	1	49145.4	1	34218.9	1	16218.1	1	30925.2	2	61954	1	41626.6	1	33754.1	1	19810.5	1
		24341.3	1	39348.2	1	40503.4	1	41128.1	1			45760.5	1	38319.2	1	42754.3	1			49638.9	1					61595	1	50697.9	1			37758.4	1	49150.7	1	34416.9	1	16271.5	1	30985.4	2	62608.9	1	41629	1	33787.2	1	19826.9	1
		24362.2	1	39491.9	1	40551.3	1	41248.3	1			46422.3	1	38672.8	1	43055.6	1			49839.9	1					61793.1	1	50931.8	1			37813.2	1	49758	1	34732.5	1	16468.4	1	31001.7	2	63074.7	1	41797.7	1	33903.3	1	19844.3	1
		24443.2	1	39735.1	1	40979.9	1	41639	1			46608.3	1	38943.5	1	43128.9	1			50287.5	1					62008.5	1	51274.9	1			38211.7	1	49984.8	1	35199.5	1	16506.2	1	31126.4	2	63553.1	1	42126.1	1	34044.6	1	19896.6	1
		24469.1	1	39796.7	1	41526.1	1	42008.1	1			46963.6	1	39314.5	1	43223.7	1			50806.2	1					62504.6	1	51406.4	1			38597.8	1	50296.4	1	35631.6	1	16635.5	1	31184.9	2	64114	1	42144.8	1	34073.5	1	19898.8	1
		24515.7	1	39798.1	1	41556.6	1	42087.3	1			47268.8	1	39671.6	1	43627.2	1			50996.7	1					63112.8	1	51879.1	1			38631.6	1	50778.5	1	36028.7	1	16652.8	1	31239.4	2	64939.1	1	42388.5	1	34203.3	1	19904	1
		24739.8	1	40285.8	1	42000	1	42504.7	1			47416.3	1	39864.3	1	43753.3	1			51362.5	1					63547.3	1	52414.7	1			39024.6	1	51112	1	36355.9	1	16701.5	1	31344.9	2	65435.6	1	42589.5	1	34636.9	1	19918.6	1
		24863.8	1	40402	1	42054.8	1	42521.8	1			47791	1	40364.1	1	44286.5	1			51553.8	1					63929.8	1	52565.9	1			39212.3	1	51352.1	1	36573.6	1	16834.4	1	31374.3	2	66806.1	1	42994.6	1	34834.4	1	19922.8	1
		24908.5	1	40663.1	1	42416.6	1	42743.5	1			47830.7	1	40537.2	1	44502.6	1			51815.9	1					64266.7	1	53052.5	1			39395.8	1	51905.5	1	36816.9	1	16917.6	1	31459.8	2	67741.5	1	43033.9	1	35023.4	1	19923.5	1
		25054.9	1	40720.6	1	42851.2	1	42930.8	1			48097.7	1	40902.6	1	44567.1	1			52303.8	1					64455.5	1	53156.9	1			39609.2	1	52213.7	1	37077.8	1	17085.3	1	31520.7	2			43370.2	1	35373.3	1	19933.7	1
		25415.9	1	40760.9	1	42882.6	1	43110.8	1			48371.8	1	41507.7	1	44938.2	1			52682.8	1					64681	1	53447.4	1			39744.2	1	52426.6	1	37385.5	1	17135.5	1	31598.6	2			43543.9	1	35487.9	1	19937	1
		25551	1	40914.8	1	43202.1	1	43257.8	1			48465.3	1	41671.5	1	45060.5	1			52813.9	1					65022.5	1	53493.8	1			40047.8	1	52830.1	1	37688.2	1	17238.7	1	31704.4	2			43820.2	1	36040.3	1	19958.4	1
		25804.8	1	41068.9	1	43467.8	1	43545.3	1			48828.7	1	42012.2	1	45554.6	1			53372.3	1					65423.6	1	53927.6	1			40176.8	1	53158.7	1	38130.4	1	17274.8	1	31750.3	2			44093.5	1	36041.9	1	19973.8	1
		25938.5	1	41316.6	1	43647.1	1	43586.5	1			49092.8	1	42110.1	1	45630.9	1			53419.7	1					65831.9	1	54013.4	1			40327.5	1	53256.5	1	38445.3	1	17378.2	1	31891.3	2			44097.4	1	36129.4	1	20000.7	1
		26324.6	1	41474.7	1	43796	1	44114.1	1			49660.6	1	42467.8	1	45993.1	1			53931.2	1					66226.2	1	54480.7	1			40347.8	1	53771.9	1	38781.9	1	17449.6	1	31971.9	2			44150.3	1	36335.7	1	20031.5	1
		26420.2	1	41571.6	1	44309.7	1	44267	1			49674.9	1	42551	1	46463.8	1			54030.2	1					66896.2	1	54581	1			40568.8	1	54166.2	1	38964.5	1	17453.1	1	32033.6	2			44192.8	1	36342.2	1	20053.1	1
		26452.7	1	41889.7	1	44350.1	1	44525	1			50034.4	1	43054.6	1	46523.4	1			54456.8	1					67352.1	1	55378.3	1			40840.8	1	54294.3	1	39236	1	17596.1	1	32204.2	2			44202.1	1	36457.8	1	20114.5	1
		26794.5	1	41901.2	1	44640.2	1	44739.3	1			50211.3	1	43482.1	1	46744.5	1			54643.6	1					68173.8	1	55453.4	1			41010.1	1	54650.7	1	39544.7	1	17601	1	32250.2	2			44224.6	1	36494.6	1	20128.7	1
		26871	1	42216.7	1	44903.3	1	44938.8	1			50761.2	1	43617.5	1	46973.1	1			55051.1	1					68707.3	1	55824.1	1			41299.9	1	55018.8	1	39734.5	1	17711.8	1	32494	2			44249.7	1	36716.8	1	20131	1
		26899.9	1	42477.4	1	45089.6	1	45498.3	1			50892.8	1	44122.5	1	47447.3	1			55150.6	1					69251.1	1	55883.5	1			41611.6	1	55090.9	1	39926.3	1	17796.4	1	32526.1	2			44275.4	1	36901.3	1	20249.6	1
		26906.9	1	42532.3	1	45405.8	1	45594.4	1			51471.2	1	44124	1	47657	1			55647.7	1					69760.7	1	56255.6	1			41632.8	1	55527.9	1	40281.2	1	17835.3	1	32708.2	2			44276.3	1	37097.2	1	20272.1	1
		27071.6	1	42731.6	1	45651	1	46114.8	1			51489.5	1	44572.2	1	47874.7	1			55742.1	1					70614.7	1	56361.4	1			42030.4	1	55777.2	1	40674.8	1	18010.1	1	32718.8	2			44379.5	1	37294.9	1	20275.3	1
		27321.3	1	43185.3	1	45899.8	1	46287.2	1			51904.4	1	44767	1	48278.5	1			56066.8	1					71634.1	1	56850.7	1			42155	1	56113.4	1	40937.7	1	18025.1	1	32923.2	2			44394	1	37407	1	20313.9	1
		27367	1	43308	1	45917.8	1	47028.9	1			52076.9	1	44906.8	1	48491	1			56375.1	1							57138	1			42452.5	1	56223.9	1	41081.4	1	18174	1	32973.3	2			44395.7	1	37591.5	1	20317.3	1
		27619.2	1	43485.4	1	46074.5	1	47336.7	1			52468.6	1	44976.9	1	48869.8	1			56545	1							57325.7	1			42786	1	56575.4	1	41321.2	1	18263.9	1	33170.5	2			44433.9	1	37674.4	1	20339.7	1
		27645.4	1	43856.6	1	46256.6	1	47844.1	1			52746.1	1	45232.2	1	48883.9	1			57076.8	1							57616.4	1			42852.5	1	57053.2	1	41680.9	1	18265.3	1	33237.4	2			44437.7	1	37895.8	1	20383	1
		27738	1	44015.5	1	46547.4	1	47854.4	1			53067.5	1	45619.9	1	49332	1			57219.3	1							58134.8	1			43208.1	1	57534.6	1	42102.8	1	18272	1	33390.1	2			44458.9	1	38098.2	1	20442	1
		27839.3	1	44201	1	46718.7	1	48116.2	1			53317.3	1	45654.1	1	49335.6	1			57841.5	1							58137.3	1			43481.1	1	57619.3	1	42359.1	1	18365.6	1	33424.8	2			44546.1	1	38162.8	1	20443.1	1
		28110.5	1	44555.5	1	46736.5	1	48279.4	1			53326.8	1	46160.9	1	49691.7	1			57960.9	1							58568.9	1			43549.7	1	58099.2	1	42394.8	1	18459	1	33601.1	2			44643	1	38316.2	1	20498.3	1
		28160.7	1	44686.9	1	47043.6	1	48737.3	1			54172.8	1	46471.9	1	50019.8	1			58615.6	1							59231.7	1			43966.9	1	58422.2	1	42441.2	1	18463.9	1	33666.1	2			44701.8	1	38636.5	1	20529.9	1
		28203.9	1	45089.9	1	47304.9	1	48918.2	1					46764.5	1	50273.1	1			58789.7	1							59375.9	1			44175	1	58478.5	1	42444.6	1	18539.7	1	33905.2	2			44745.4	1	38790.9	1	20544	1
		28325.3	1	45412	1	47528.5	1	49361.4	1					46925.6	1	50593	1			59160.8	1							59896.9	1			44178.9	1	58835.2	1	42516.6	1	18611.4	1	33953.5	1			44748	1	38944.9	1	20607.5	1
		28415.2	1	45418.2	1	47855.3	1	49612	1					47098.4	1	50957.3	1			59564.1	1							60090.3	1			44478.4	1	59098	1	42617.2	1	18652.8	1	34135.9	1			44804.7	1	38970.7	1	20609.1	1
		28518	1	45745.9	1	47969.6	1	49903.2	1					47184.3	1	51138.8	1			59833.9	1							60565.6	1			44748.9	1	59292.7	1	42662.3	1	18668.7	1	34162.8	1			44812	1	39249.3	1	20628.4	1
		28689.8	1	45964.5	1	48318.8	1	50015.4	1					47420.1	1	51426.9	1			60324.3	1							60790.6	1			44823.4	1	59356.7	1	43130.7	1	18687.1	1	34358.7	1			45115.4	1	39445.6	1	20634.4	1
		28860.3	1	46189.4	1	48547.5	1	50363.6	1					47644.3	1	51455.9	1			60379.4	1							61610.6	1			45112	1	59816.8	1	43196.2	1	18740.5	1	34365.8	1			45201.9	1	39638	1	20680.5	1
		29017.8	1	46466.3	1	48831.7	1	50581.5	1					48037.4	1	51662.4	1			60683.4	1											45396.7	1	59874.9	1	43222.1	1	18797.7	1	34482.5	1			45222.5	1	39752	1	20690.1	1
		29152.8	1	46478.6	1	49305.4	1	50996.1	1					48090.9	1	51987.5	1			61086.7	1											45469.4	1	60289.9	1	43271.7	1	18857.3	1	34566.3	1			45249.7	1	39995.4	1	20694.9	1
		29394.3	1	46602.7	1	49308.9	1	51308.2	1					48550.4	1	52015.3	1			61259.5	1											45825	1	60713.7	1	43297.3	1	18866.5	1	34574.3	1			45256.9	1	40143.9	1	20775.7	1
		29605.4	1	46789.9	1	50014.9	1	51544	1					48822.8	1	52143.6	1			61967.5	1											45866.8	1	60759.6	1	43309.9	1	18897.6	1	34692.8	1			45294.4	1	40335.4	1	20830.5	1
		29605.4	1	46980.9	1	50106.5	1	51894.6	1					48865.5	1	52501.6	1			62122.6	1											46161	1	61281.1	1	43475.6	1	18907.6	1	34778.9	1			45312.2	1	40450.6	1	21109.3	1
		29672.2	1	47058.3	1	50511.8	1	52039.4	1					49182.3	1	52910.5	1			62553.9	1											46552.8	1	61609	1	43625.9	1	18949.4	1	34826.7	1			45524.5	1	40792.8	1	21129.4	1
		29952.4	1	47285.1	1	50603.4	1	52276.7	1					49414	1					62617.1	1											46773	1	61966.4	1	43947.2	1	19000.2	1	34996.2	1			45796.8	1	40890.5	1	21439.6	1
		30003	1	47540.3	1	50928.7	1	52438.7	1					49785.1	1					63119.7	1											46794.2	1	62150.9	1	44385.7	1	19053.4	1	35072	1			45922.3	1	41231.5	1	21463.8	1
		30017.8	1	47828	1	51150	1	52583.6	1					49912.8	1					63654.8	1											47018.3	1	62559	1	44876.5	1	19074.3	1	35257.8	1			45956.9	1	41440.1	1	21683.3	1
		30383.6	1	47888.2	1	51423.4	1	53049	1					50031.1	1					63716.7	1											47318.2	1	62713.9	1	45213.8	1	19102.9	1	35270.5	1			46142.9	1	41721	1	21838.3	1
		30435.3	1	48211.3	1	51880.6	1	53117.7	1					50064	1					64380.3	1											47503.6	1	63240.9	1	45566.4	1	19141.5	1	35455.9	1			46396	1	41846.2	1	21900.4	1
		30657.4	1	48436.3	1	51956.8	1	53610.9	1					50245.8	1					64420.6	1											47826.2	1	63753.2	1	45944	1	19216.9	1	35526.6	1			46456.4	1	42240.3	1	22108.2	1
		30674.1	1	48651.5	1	52335.4	1	53879.5	1					50344.8	1					65249.9	1											47845.8	1	64114.9	1	46276.6	1	19234.9	1	35649.9	1			46623.1	1	42455.5	1	22168.2	1
		30719.8	1	48959.5	1	52420.8	1	54053.8	1					50409.1	1					65269.6	1											48023.4	1	64270.6	1	46491.4	1	19301.4	1	35738.1	1			46787.4	1	42742.2	1	22218.7	1
		30743.9	1	49044.1	1	52695.8	1	54541.7	1					50454.9	1					66153.2	1											48264	1	65095.1	1	46573	1	19349.1	1	35867.9	1			46884.2	1	42812.3	1	22394.4	1
		31052.1	1	49207.7	1	52885.3	1	54552.8	1					50464.1	1					66182	1											48439	1	65344.6	1	46792.2	1	19354.3	1	36071.9	1			46936.2	1	43218.9	1	22559.8	1
		31071.9	1	49393.7	1	52947.5	1	55059	1					50525.3	1					66674.7	1											48739.8	1	65866.6	1	46796.6	1	19395.6	1	36124.4	1			47011.5	1	43304.1	1	22632.9	1
		31219	1	49428.1	1	53339	1	55372.3	1					50650.7	1					67047.5	1											48777.6	1	66484.4	1	46901.1	1	19488.2	1	36400.3	1			47160.6	1	43617.4	1	22727.9	1
		31384.6	1	49591.8	1	53580.7	1	55525.1	1					50738	1					67313.8	1											49127.4	1	66503.8	1	47074.2	1	19587.3	1	36524.4	1			47280.7	1	43756.9	1	22756.7	1
		31409.2	1	49689.6	1	53617.4	1	55802.3	1					50772.3	1					67443.9	1											49466.7	1	67071.1	1	47246.4	1	19684.4	1	36728.7	1			47339.1	1	44024.4	1	22909	1
		31486.2	1	49789.2	1	53892.7	1	56131.7	1					50881.8	1					67805.9	1											49501.9	1	67285	1	47673.6	1	19694.6	1	36767.7	1			47396.9	1	44215.7	1	22928.7	1
		31895.3	1	50044	1	54183.9	1	56216.2	1					50929	1					68565.2	1											49841.5	1	67343.6	1	47997.7	1	19823.2	1	37084.5	1			47582.5	1	44349.1	1	23080.9	1
		31927.7	1	50164.9	1	54305.1	1	56626.7	1					51078.8	1																	50101.3	1	67778.5	1	48386.4	1	19875.6	1	37126	1			47802.7	1	44535.2	1	23178.5	1
		32048.4	1	50469	1	54400.3	1	56684.4	1					51285.6	1																	50278.7	1	68316.9	1	48817.5	1	19970.7	1	37365	1			48193.8	1	44651.7	1	23392.3	1
		32121.6	1	50598.4	1	55129.1	1	56890.9	1					51743.5	1																	50674.5	1	68881.1	1	49054.5	1	20032.2	1	37404.3	1			48299.5	1	44869.4	1	23424.9	1
		32260.4	1	50708.5	1	55256.5	1	57136.3	1					51862.5	1																	51057.2	1	69494	1	49389.7	1	20132.8	1	37509.1	1			48722.9	1	45084.6	1	23635.8	1
		32550.9	1	50923.3	1	55711.7	1	57225	1					52019.2	1																	51256.6	1	70332.3	1	49671.9	1	20177.9	1	37632.4	1			48856	1	45445.7	1	23659.4	1
		32554.4	1	51001.4	1	55871.6	1	57700.7	1					52102.9	1																	51385	1			50041.7	1	20296.4	1	37675.4	1			48929.4	1	45446.4	1	23769	1
		32563.7	1	51447.2	1	56210.8	1	57748.2	1					52150.3	1																	51473.4	1			50444.1	1	20325	1	37835.4	1			49120.7	1	45500.2	1	23789.8	1
		32789.6	1	51729.5	1	56517.9	1	58382.6	1					52241.9	1																	51822.1	1			50704.1	1	20349.6	1	37945.6	1			49267.6	1	45556.2	1	23829.6	1
		32893.3	1	52042.7	1	56682	1	58462.5	1					52278.3	1																	51975.8	1			50969.6	1	20397.5	1	38097	1			49300.5	1	45708.5	1	23916.1	1
		32936.6	1	52492.8	1	56933.4	1	59132.2	1					52438.1	1																	52307.5	1			51046.3	1	20412.3	1	38343.8	1			49776.4	1	45765.4	1	24009.1	1
		33061.4	1	52993.5	1	57495.5	1	59219.1	1					52512	1																	52618.4	1			51079.3	1	20489	1	38354.5	1			49811.8	1	45771	1	24036.7	1
		33231	1	53706.2	1	57834.5	1	59713.6	1					52556.9	1																	52678.3	1			51162	1	20601.8	1	38612.5	1			50057.4	1	45833.3	1	24095.7	1
		33265.5	1			58243.6	1	59809	1					52595.5	1																	52945.6	1			51391.1	1	20623.5	1	38625.2	1			50306.4	1	46249.1	1	24167.9	1
		33378.8	1			58300.5	1	60081.9	1					52658.1	1																	53097.6	1			51746.5	1	20743.7	1	38799.5	1			50333.6	1	46300.6	1	24256.8	1
		33485.4	1			58652.1	1	60149.7	1					52681.9	1																	53219.6	1					20761.2	1	38895.2	1			50527.3	1	46650.9	1	24282.9	1
		33507.6	1			58801.8	1	60521.6	1					52684.7	1																	53487.5	1					20820.7	1	39043.5	1			50652.9	1	46899.2	1	24364.7	1
		33594.6	1			59011.1	1	61135	1					52693.6	1																	53715.4	1					20897.6	1	39185.2	1			50723.5	1	47045.9	1	24371.6	1
		33602.4	1			59084.5	1	61221.1	1					52722.9	1																	53948.5	1					20906.2	1	39353.3	1			50874.5	1	47363.2	1	24515.4	1
		33605	1			59453.3	1	61889	1					52750.5	1																	54289	1					20930.3	1	39369.7	1			51048.7	1	47503.4	1	24554.4	1
		33755.9	1			59465.3	1	62041.3	1					52842.6	1																	54392	1					21010.9	1	39599.5	1			51110.8	1	47763.5	1	24643.7	1
		33860.4	1			59775.8	1	62499.9	1					52860.2	1																	54761.9	1					21019.9	1	39708	1			51489.9	1	47909.7	1	24711.4	1
		33863.4	1			59792.5	1	63045.3	1					52873.9	1																	54862.8	1					21029.6	1	39766.7	1			51534	1	48006.6	1	24871.8	1
		33870.8	1			60007.7	1	63097.3	1					52897.5	1																	55275.7	1					21074.4	1	39944	1			51787.8	1	48444.1	1	24874.6	1
		33892.6	1			60293.9	1	63557.5	1					53125.4	1																	55278	1					21169.3	1	40018.2	1			51911.7	1	48575.3	1	25078	1
		34162.7	1			60370.9	1	63663.5	1					53303.1	1																	55500.3	1					21228.4	1	40232.5	1			51980.5	1	49016	1	25100.8	1
		34199.6	1			60698.3	1	63973.9	1					53309.7	1																	55736.5	1					21341.1	1	40309.9	1			52167.9	1	49158.2	1	25168.8	1
		34275.5	1			61139	1	64319.4	1					53312.4	1																	55821.3	1					21424.2	1	40446.7	1			52299.5	1	49250.6	1	25320.4	1
		34309.6	1			61139.3	1	64330.8	1					53541.9	1																	56105.7	1					21451.7	1	40664.2	1			52420.8	1	49366	1	25367.1	1
		34327.7	1			61598.8	1	64588.3	1					53648	1																	56463.6	1					21614.1	1	40666.1	1			52525.9	1	49609.2	1	25429.2	1
		34400.9	1			61801.9	1	64977.2	1					54037.6	1																	56482.6	1					21730.8	1	40895.2	1			52686.6	1	49773.8	1	25485.6	1
		34488.2	1			62005.1	1	65295.8	1					54568	1																	56975.8	1					21743.9	1	40896.7	1			52745.8	1	49905.5	1	25499	1
		34554.5	1			62192	1	65660.8	1					54934.4	1																	57437.8	1					21814.4	1	41071.1	1			52835.6	1	50034.6	1	25559.9	1
		34611.4	1			62523.1	1	65859.5	1					55864.2	1																	57673.9	1					21920.4	1	41153.1	1			53086.7	1	50120.1	1	25603.3	1
		34633.5	1			62650.5	1	66087.2	1					56190.2	1																	57835.9	1					21989.9	1	41263	1			53242.6	1	50324.5	1	25610.6	1
		34677	1			62777.5	1	66362.2	1					56544.8	1																	58121.9	1					22052.5	1	41413.5	1			53375.8	1	50329	1	25777.8	1
		34723.1	1			63168.6	1	66751.2	1					57081.2	1																	58435	1					22074.1	1	41427.8	1			53612.1	1	50540.1	1	25874.4	1
		34792.7	1			63543.1	1	66780.3	1					57424.9	1																	58804.1	1					22182.1	1	41598.1	1			53629	1	50565.5	1	25938.6	1
		34859.6	1			63660.5	1	67109.8	1					57880.5	1																	59284.2	1					22276.4	1	41703.6	1			53690.3	1	50622	1	26105.5	1
		34917.5	1			63837.7	1	67875.1	1					58316	1																	59332.4	1					22312.1	1	41782.3	1			54048.7	1	50673.9	1	26113.6	1
		34926.6	1			64184.7	1	68648.4	1					58740.7	1																	59929.4	1					22375.3	1	41929.3	1			54062.7	1	50792.3	1	26145.6	1
		34935.2	1			64381.2	1	69697.9	1					58926.7	1																	59932.9	1					22452	1	42012.8	1			54325	1	50817.5	1	26309.7	1
		34936.8	1			64512.7	1	70284.6	1					59314.1	1																	60303.3	1					22584.7	1	42099.1	1			54511.7	1	51070.9	1	26374.9	1
		34937.4	1			64963.4	1	70609.8	1					60036	1																	60616.4	1					22618.3	1	42184.7	1			54555.1	1	51338.3	1	26440.9	1
		34945.9	1			65012.7	1	70935.4	1					60652.9	1																	60701.5	1					22621.3	1	42346.1	1			54811.3	1	51470	1	26479.9	1
		34972.5	1			65536.7	1	71401.7	1					61234.3	1																	61083.9	1					22678.6	1	42454.7	1			54885.1	1	51527.5	1	26509.8	1
		35064.5	1			65622.7	1	72043.7	1					61841.9	1																	61106.7	1					22823.5	1	42622.8	1			55035.8	1	51759.4	1	26531.3	1
		35119.4	1			66059.3	1	72787.6	1					63056	1																	61517.6	1					22897	1	42738.8	1			55171.5	1	51872.3	1	26549	1
		35205.2	1			66427.5	1	73150.5	1																							61534.5	1					22909.8	1	42903.8	1			55252.3	1	52088.1	1	26602.2	1
		35253.4	1			66434.8	1	73374.6	1																							61796.8	1					22922.1	1	43009.1	1			55462.7	1	52261.8	1	26640.5	1
		35254.4	1			66992.7	1	74049.7	1																							61887.6	1					23123.7	1	43153.6	1			55491.5	1	52363.2	1	26756	1
		35281.8	1			67101	1	74628.1	1																							62328.1	1					23146.6	1	43270.2	1			55519.2	1	52686.9	1	26911.7	1
		35288.7	1			67419.2	1	75195.7	1																							62376.2	1					23332.4	1	43414	1			55636.5	1	52753.5	1	26959.1	1
		35320.2	1			67665.5	1	75655.7	1																							62852.1	1					23340.7	1	43479	1			55680.3	1	52997.1	1	27060.8	1
		35337.5	1			67666.9	1	76146.5	1																							62869	1					23384.8	1	43686.9	1			55801.2	1	53007.1	1	27224.1	1
		35590	1			67688.6	1	76530	1																							63214.7	1					23581.9	1	43721.2	1			55828	1	53187.6	1	27228.8	1
		35659.7	1			67804.5	1	77171.9	1																							63447.2	1					23680.5	1	43924.2	1			56020.5	1	53323.9	1	27368.1	1
		35708.5	1			67839.8	1	77673	1																							63812.8	1					23787.9	1	44005.5	1			56139.7	1	53360.5	1	27472.3	1
		35802.9	1			68155.1	1																									64173.9	1					23847.3	1	44153.2	1			56143.6	1	53417.7	1	27473.5	1
		35988.5	1			68441.5	1																									64190.1	1					24068.1	1	44287.3	1			56148.3	1	53486.4	1	27491.7	1
		36046.6	1			68516.7	1																									64616.6	1					24100.8	1	44396.9	1			56255	1	53580	1	27741.6	1
		36133	1			68732.6	1																									65064.4	1					24254.1	1	44532.9	1			56581.3	1	53659	1	27777.3	1
		36324.1	1			68737.8	1																									65143.2	1					24410.2	1	44632	1			56604.5	1	53725.6	1	27920.2	1
		36400.2	1			68752.5	1																									65451.6	1					24434	1	44768.6	1			56768.2	1	53886.7	1	27977.7	1
		36537.6	1			68772	1																									65737.7	1					24437	1	44881.8	1			56931.9	1	53976.1	1	28028.2	1
		36569.6	1			68812.2	1																									65838.9	1					24648.1	1	44982	1			57051.6	1	54261.7	1	28318.3	1
		36861.7	1			68817.6	1																									66146.5	1					24716.2	1	45160.9	1			57093	1	54274.5	1	28330	1
		36901.8	1			68829.9	1																									66258.4	1					24872.1	1	45225.4	1			57153.1	1	54344.7	1	28412.3	1
		37076.9	1			68836.8	1																															24936.2	1	45435.6	1			57339.2	1	54709.9	1	28496.7	1
		37311.1	1			69003.7	1																															24968	1	45514.7	1			57401	1	54857.9	1	28583.4	1
		37417.7	1			69011.4	1																															25096.6	1	45716.6	1			57421.7	1	55028.7	1	28690.5	1
		37454.3	1			69191.1	1																															25124.8	1	45747.3	1			57509.2	1	55242.2	1	28790.9	1
		37829	1			69253.6	1																															25260.1	1	45978.8	1			57535	1	55363.4	1	28891.2	1
		37878.8	1			69266.9	1																															25338	1	46028.5	1			57564.6	1	55649.8	1	28986.6	1
		37934.5	1			69398.2	1																															25372.6	1	46157.9	1			57565.2	1	55938.9	1	29147.1	1
		38220.9	1			69405.3	1																															25416.5	1	46268.3	1			57721.8	1	56018.4	1	29161.9	1
		38323.3	1			69503.8	1																															25622.2	1	46278	1			57974.7	1	56178.3	1	29178.4	1
		38324.4	1			69526.9	1																															25674.3	1	46437.2	1			57982.9	1	56447.2	1	29390.9	1
		38611.8	1			69538.5	1																															25732.7	1	46589.6	1			58183.1	1	56678.2	1	29499.2	1
		39019	1			69631.6	1																															25883.4	1	46672.9	1			58322.3	1	56702.6	1	29507.7	1
		39111	1			69638.2	1																															25907.5	1	46783.3	1			58323.8	1	57027.4	1	29675.7	1
		39215.8	1			69672.7	1																															26070.1	1	47001.7	1			58348.4	1	57334.8	1	29708.6	1
		39245.8	1			69679.5	1																															26154.9	1	47020	1			58394	1	57402	1	29847.5	1
		39334.9	1			69720.1	1																															26252.6	1	47199.4	1			58472.7	1	57697.6	1	29966.7	1
		39597.7	1			69729.6	1																															26265.3	1	47349.9	1			58515.7	1	57979.4	1	30191	1
		39948.8	1			69741.6	1																															26494.8	1	47386.7	1			58530.4	1	58195.3	1	30218.3	1
		40189.9	1			69742.9	1																															26541.5	1	47601.3	1			58684.6	1	58399.6	1	30338.1	1
		40196.2	1			69772.9	1																															26651.4	1	47644.6	1			59049.2	1	58467.4	1	30464.2	1
		40506.3	1			69953.3	1																															26686	1	47834.5	1			59384.9	1	58765.5	1	30686	1
		40738.4	1			69984.7	1																															26846.5	1	47845.6	1			59853.3	1	59048.9	1	30726.7	1
		40888.3	1			70020.6	1																															26928.1	1	48045	1			60359	1	59207.6	1	30822.4	1
		40891.8	1			70040.2	1																															27121.3	1	48125.4	1			61123.4	1	59370.8	1	30919.7	1
		41198.7	1			70040.2	1																															27132.2	1	48234.7	1			61832.3	1	59773.1	1	30933.8	1
		41222.2	1			70145.6	1																															27165.2	1	48348.7	1			62746.4	1	60215	1	31146.1	1
		41516.8	1			70224.6	1																															27368.9	1	48438.6	1			63362.4	1	60631.4	1	31200.1	1
		41665	1			70292.3	1																															27437.6	1	48555.2	1			64093.2	1	61092.2	1	31206.6	1
		41755.7	1			70304.9	1																															27630.1	1	48659.1	1			64625.8	1	61532.5	1	31289	1
		42031.5	1			70341.7	1																															27640.5	1	48765.7	1			65115.2	1	62012.9	1	31385.4	1
		42099.5	1			70391.3	1																															27692.6	1	48997.1	1			65634.7	1	62633.2	1	31519.2	1
		42328.2	1			70398.3	1																															27800.9	1	49060.9	1			65948.8	1	63042.4	1	31550.8	1
		42355.6	1			70398.6	1																															27927.1	1	49209.8	1			66308.1	1	63578.6	1	31818.3	1
		42552.4	1			70406.2	1																															27993.2	1	49367.1	1			66832.8	1	64068.1	1	32042.9	1
		42760.8	1			70506.6	1																															28189.3	1	49465.4	1			67291.8	1	64402.9	1	32091.3	1
		42863.3	1			70512.1	1																															28190.7	1	49667.2	1			67730.3	1	64745.4	1	32220.5	1
		43086.3	1			70617.9	1																															28191.7	1	49706.8	1			68159	1	65107.5	1	32459.6	1
		43392.2	1			70619.4	1																															28423.5	1	49871.5	1			68608.1	1	65515.9	1	32505.5	1
		43461	1			70646.9	1																															28489.3	1	49959.7	1			69118.9	1	65987.2	1	32583.2	1
		43598.8	1			70661.4	1																															28610.6	1	50130.6	1			69616.4	1	66411.2	1	32838.2	1
		44129.2	1			70662.2	1																															28698.5	1	50241.4	1			69923.2	1	66853.3	1	32842.9	1
		44131	1			70719.8	1																															28770.4	1	50358.8	1			70198.1	1	67140.4	1	33171.5	1
		44271.7	1			70754.5	1																															28870.9	1	50487.8	1			70432.7	1	67548.8	1	33374.8	1
		44762.6	1			70804.2	1																															28967.2	1	50574	1			71039.4	1	67864.5	1	33393.4	1
		44809.5	1			70845.4	1																															29097.5	1	50624.4	1			71475.3	1	68170.6	1	33410.9	1
		44838.2	1			70899.1	1																															29198.4	1	50808.1	1			72006.6	1	68377.7	1	33601	1
		45100.5	1			71036.4	1																															29286.1	1	50813.2	1			72393.2	1	68652.4	1	33913.1	1
		45188.7	1			71049.6	1																															29332.8	1	50960.8	1			73169.8	1	68838.7	1	34022.2	1
		45366.4	1			71055.6	1																															29439.1	1	51052.7	1			73640.3	1	69107.3	1	34065.2	1
		45506	1			71074.7	1																															29486	1	51054.1	1			74007.1	1	69393.4	1	34278.3	1
		45516	1			71182.5	1																															29615.5	1	51135.4	1			74528.2	1	69668.7	1	34460.4	1
		45657.4	1			71521.9	1																															29695.2	1	51338.5	1			74900.4	1	69881.9	1	34611.4	1
		45844.1	1			71531.8	1																															29781.3	1	51367.5	1			75303.5	1	70196.4	1	34667.8	1
		45940.6	1			71586.3	1																															29781.7	1	51511.9	1			75863	1	70538.2	1	34922.3	1
		46029.5	1			72085.9	1																															29868.3	1	51557.6	1			76371	1	70788.2	1	34964.8	1
		46149.4	1			72834.5	1																															29872	1	51658.9	1			76718.4	1	70952	1	35217.2	1
		46153.1	1			73380.4	1																															29879.6	1	51703.1	1			77172.6	1	71194.9	1	35253.3	1
		46225.4	1			74062.5	1																															29882.8	1	51820.7	1			77547.7	1	71514.6	1	35406.2	1
		46485.5	1			74989.7	1																															29896.6	1	51971.2	1					71995.2	1	35469.6	1
		46598.3	1			75656.2	1																															29902.1	1	51972.2	1					72400	1	35619.2	1
		46710.7	1			76269.2	1																															29911.5	1	52050.4	1					72912.9	1	35830.3	1
		46721.4	1			76849.8	1																															29929.2	1	52136.7	1					73167.6	1	35908.6	1
		46746.3	1																																			29958.9	1	52208.8	1					73571.5	1	35977.8	1
		47262.5	1																																			29979.5	1	52220.5	1					73945.4	1	36170.1	1
		47276.2	1																																			29983	1	52321.4	1					74275	1	36389.1	1
		47361	1																																			29997	1	52383.4	1					74596.9	1	36450.1	1
		47369.8	1																																			30002.8	1	52399.7	1					74936.7	1	36631.9	1
		47772.8	1																																			30028.5	1	52502.1	1					75196	1	36658.8	1
		47835.7	1																																			30041.2	1	52612.6	1					75458.4	1	36934	1
		47946.7	1																																			30044.9	1	52624.6	1					75755.9	1	36975.2	1
		48135.1	1																																			30048.5	1	52737.5	1					76115.3	1	37145	1
		48158.1	1																																			30068.1	1	52824.4	1					76666.9	1	37247.8	1
		48215.2	1																																			30106.3	1	52856.6	1					77029.5	1	37391.1	1
		48300.8	1																																			30165.1	1	52930.8	1					77435.8	1	37571.1	1
		48541.7	1																																			30204.8	1	53038.7	1					77648.2	1	37722.9	1
		48548.2	1																																			30252.1	1	53061.2	1					77839.8	1	37738.7	1
		48792.8	1																																			30286	1	53144.1	1							37952.5	1
		48799.7	1																																			30351.3	1	53251.1	1							38095.2	1
		48837	1																																			30367	1	53274.4	1							38149.4	1
		49138.6	1																																			30388.9	1	53385	1							38368.5	1
		49298.6	1																																			30401.4	1	53493.4	1							38494.2	1
		49311.4	1																																			30477.9	1	53530.2	1							38688.1	1
		49393.9	1																																			30533.1	1	53621.3	1							38720.3	1
		49574	1																																			30546.7	1	53667.4	1							38737.3	1
		49993.9	1																																			30560.2	1	53706.1	1							39074.4	1
		50080.9	1																																			30631.1	1	53765.2	1							39114.5	1
		50082.3	1																																			30692.2	1	53780.5	1							39189.6	1
		50265.9	1																																			30706.7	1	53865.4	1							39242.3	1
		50593.5	1																																			30731.3	1	53868.7	1							39271.8	1
		50611.5	1																																			30754.7	1	53959.2	1							39369.7	1
		50837	1																																			30935.1	1	53991.5	1							39684.2	1
		51118.5	1																																			30944.7	1	54061.2	1							39686.7	1
		51185.5	1																																			30981.8	1	54162.2	1							39841.6	1
		51285.5	1																																			31026.3	1	54212.9	1							39882.6	1
		51491.1	1																																			31169.4	1	54280	1							40229.5	1
		51786.8	1																																			31227.4	1	54383.7	1							40268	1
		51906.6	1																																			31280.7	1	54486.2	1							40340.2	1
		52005.7	1																																			31358.4	1	54521	1							40516.5	1
		52212.8	1																																			31488	1	54583.8	1							40793	1
		52273.1	1																																			31613.5	1	54757.2	1							40819.1	1
		52795.2	1																																			31647.9	1	54802	1							40925.9	1
		52947.7	1																																			31652.6	1	54984.1	1							41031.2	1
		53019.7	1																																			31769.3	1	55123.6	1							41309.9	1
		53200.6	1																																			31861.5	1	55204	1							41560.6	1
		53435.8	1																																			31875.4	1	55295.1	1							41562.7	1
		53467.2	1																																			31963.3	1	55407.7	1							41601.2	1
		54050.4	1																																			32064.1	1	55444.8	1							41739.2	1
		54168.2	1																																			32087.6	1	55549.3	1							41799.1	1
		54210.3	1																																			32141.1	1	55627.7	1							41812.9	1
		54332.8	1																																			32149.8	1	55656.5	1							41901.1	1
		54642.7	1																																			32170.2	1	55796.7	1							41934.8	1
		54689	1																																			32295.3	1	55841.2	1							41994.2	1
		55325.2	1																																			32427.1	1	55976.4	1							42001.2	1
		55342.9	1																																			32488.7	1	56022	1							42015.2	1
		55579.9	1																																			32515.9	1	56090.5	1							42053.3	1
		55749.5	1																																			32609.8	1	56203.8	1							42184.1	1
		55957.9	1																																			32730.9	1	56242.9	1							42204.2	1
		56196.3	1																																			32763.8	1	56417.4	1							42222.3	1
		56544.1	1																																			32840.6	1	56456.3	1							42291.3	1
		56607.6	1																																			32967.9	1	56616.9	1							42304.8	1
		56678.4	1																																			33065.5	1	56658.6	1							42373.1	1
		57111.8	1																																			33138.9	1	56781.4	1							42454.4	1
		57232.8	1																																			33318.9	1	56867.2	1							42582.3	1
		57516.5	1																																			33415.7	1	56946	1							42740.1	1
		57710.8	1																																			33515.1	1	57113.9	1							42891.2	1
		57918.9	1																																			33604.1	1	57181.6	1							42951.7	1
		57973.9	1																																			33695.4	1	57261	1							43218.3	1
		58114.6	1																																			33816.6	1	57474.9	1							43235.9	1
		58376.4	1																																			33834.5	1	57526.7	1							43262.7	1
		58771.9	1																																			34015.7	1	57748.9	1							43529	1
		58908.6	1																																			34131.3	1	57877	1							43576.2	1
		59027.8	1																																			34147.8	1	57957.6	1							43719.3	1
		59028.2	1																																			34248.3	1	58119.2	1							43943.9	1
		59044.3	1																																			34431.4	1	58149.1	1							44209	1
		59156.8	1																																			34520.3	1	58342.8	1							44240.9	1
		59248.9	1																																			34642	1	58379.3	1							44300.9	1
		59321.7	1																																			34793.9	1	58518.1	1							44560.5	1
		59445.3	1																																			34871.2	1	58644.2	1							44707.3	1
		59543.7	1																																			35012.2	1	58695.4	1							44859.3	1
		59974.3	1																																			35093.9	1	58841.3	1							44914.8	1
		60003.7	1																																			35258.5	1	58890.2	1							45028.4	1
		60082.1	1																																			35333.4	1	58956.5	1							45066.2	1
		60197.1	1																																			35415.8	1	59055.6	1							45164.4	1
		60201.5	1																																			35493.7	1	59093.9	1							45169.8	1
		60221.9	1																																			35623.8	1	59241.9	1							45308.1	1
		60432.7	1																																			35649.7	1	59286.9	1							45449.7	1
		60739.2	1																																			35828.7	1	59436	1							45497.4	1
		60761.3	1																																			35885.5	1	59448.4	1							45656.1	1
		61112	1																																			35986.2	1	59615.9	1							45829.4	1
		61113	1																																			35986.8	1	59689.9	1							45907.3	1
		61194.5	1																																			36151.3	1	59798.5	1							45974.2	1
		61261.1	1																																			36203.6	1	59975.1	1							46090	1
		61394.1	1																																			36279.9	1	59995.5	1							46161.7	1
		61467	1																																			36419.1	1	60228.3	1							46239.7	1
		61538.2	1																																			36424.1	1	60318.3	1							46300	1
		61576.3	1																																			36456.2	1	60473.3	1							46355.2	1
		61729.1	1																																			36527.7	1	60643.6	1							46393.9	1
		61957.2	1																																			36609	1	60685.9	1							46450.7	1
		62018.1	1																																			36713.2	1	60846.1	1							46745.7	1
		62189.2	1																																			36745	1	60868.5	1							46750.4	1
		62516.8	1																																			36807.6	1	61024.9	1							47051.6	1
		62539.2	1																																			36839.3	1	61057.9	1							47059.1	1
		62928.7	1																																			36856.6	1	61223.9	1							47096.6	1
		63036.8	1																																			36896.2	1	61280.1	1							47112.9	1
		63394.1	1																																			37015.4	1	61404.1	1							47240.7	1
		63657.8	1																																			37074.8	1	61611.7	1							47388.4	1
		63799.6	1																																			37107	1	61671.6	1							47470.9	1
		63838.8	1																																			37191.5	1	61866.2	1							47509.1	1
		63992.8	1																																			37338.5	1	61901.7	1							47631.1	1
		64223.9	1																																			37408.6	1	62083.5	1							47678.1	1
		64456.8	1																																			37422.7	1	62128.3	1							47778.2	1
		64598	1																																			37440.4	1	62315.3	1							47793.8	1
		64693.4	1																																			37538.7	1	62406.3	1							47823.9	1
		65122.8	1																																			37683	1	62558.6	1							47917.2	1
		65250	1																																			37768	1	62653	1							47979	1
		65446.6	1																																			37858.8	1	62843.8	1							48005.9	1
		65469.2	1																																			38027.8	1	62861.3	1							48098.9	1
		65797.9	1																																			38048.2	1	63045.1	1							48181.4	1
		65907.3	1																																			38272.6	1	63132.1	1							48207.2	1
		66041.5	1																																			38309.6	1	63177.4	1							48411.9	1
		66079.7	1																																			38335	1	63318.2	1							48644.4	1
		66285.5	1																																			38492.4	1	63345.9	1							48649.6	1
		66344.4	1																																			38636.4	1	63567.6	1							48736	1
		66615.9	1																																			38749.5	1	63582.1	1							48958.7	1
		67053.9	1																																			38818.8	1	63656.5	1							48971.5	1
		67301.1	1																																			38913.7	1	63743.9	1							49149.9	1
		67547.6	1																																			38939.9	1	63794.2	1							49197.1	1
		67855.5	1																																			39066.7	1	63845.7	1							49217.2	1
		68150	1																																			39127.6	1	63947.5	1							49396.3	1
		68280.9	1																																			39218.4	1	64030.6	1							49540.8	1
		68527.4	1																																			39324	1	64079.7	1							49643.8	1
		68952.2	1																																			39443.5	1	64192.4	1							49862	1
		69045.2	1																																			39455.6	1	64278.8	1							49880.3	1
		69252.1	1																																			39476.1	1	64382.2	1							49981.1	1
		69574.6	1																																			39632.4	1	64423.8	1							50174	1
		69596.9	1																																			39704.5	1	64577.4	1							50188.1	1
		69949.5	1																																			39825.4	1	64604.6	1							50263.9	1
		70155.6	1																																			39935.7	1	64792.9	1							50273.6	1
		70156.9	1																																			40012.8	1	64868.4	1							50303.2	1
		70375.9	1																																			40018.8	1	64993.3	1							50375.2	1
		70643.5	1																																			40083.5	1	65052.2	1							50379.5	1
		70944.3	1																																			40240.1	1	65063.5	1							50476.9	1
		71057.8	1																																			40309.7	1	65067.6	1							50505.1	1
		71179.2	1																																			40511.1	1	65092.4	1							50529.7	1
		71670.5	1																																			40592.1	1	65185.9	1							50552.9	1
		72031.9	1																																			40631.8	1	65193.1	1							50576	1
		72496.4	1																																			40776.5	1	65268.2	1							50604.7	1
		72611	1																																			40837.7	1	65296	1							50776.7	1
		72959.3	1																																			41105.8	1	65422	1							50793.5	1
		73441.5	1																																			41111	1	65464.8	1							50813.3	1
		74480.4	1																																			41237.8	1	65495.2	1							50844	1
		75345.5	1																																			41299.1	1	65545.9	1							50845.3	1
		76076.7	1																																			41378.7	1	65549.2	1							50937.5	1
		76741.6	1																																			41544.4	1	65585.9	1							51004	1
		77447.7	1																																			41601.2	1	65664.8	1							51015.5	1
		77980.7	1																																			41744.9	1	65714.7	1							51038.3	1
		78668.7	1																																			41755.2	1	65735.6	1							51122.9	1
		79281.4	1																																			41817.5	1	65847.9	1							51168.7	1
		80075.6	1																																			41926.6	1	65860.8	1							51189.8	1
		81057.6	1																																			41999.9	1	65940.6	1							51242.4	1
		81768.9	1																																			42153.1	1	66005.7	1							51303.3	1
		82410.6	1																																			42159.2	1	66020.2	1							51318.9	1
		83223.8	1																																			42214.4	1	66128.9	1							51323.3	1
		83987.9	1																																			42286.4	1	66159.3	1							51332.4	1
		84369.6	1																																			42404.1	1	66185.2	1							51407.4	1
																																						42450.4	1	66290.3	1							51592.7	1
																																						42543.9	1	66366.8	1							51763.5	1
																																						42584.5	1	66436.2	1							51901	1
																																						42693	1	66453.3	1							51958.7	1
																																						42801.9	1	66585.2	1							52096.6	1
																																						42924.5	1	66586.4	1							52289.1	1
																																						42950	1	66629.8	1							52325.2	1
																																						43049.2	1	66672.6	1							52388.7	1
																																						43192.7	1	66679.5	1							52708.6	1
																																						43354.6	1	66831.9	1							52738.6	1
																																						43384.6	1	66919.2	1							52770.7	1
																																						43452.9	1	67072.9	1							52795.4	1
																																						43608.9	1	67177.4	1							52863	1
																																						43641.6	1	67297.4	1							52940.2	1
																																						43774.8	1	67416.1	1							53002	1
																																						43894.5	1	67511.4	1							53010.6	1
																																						44024.5	1	67645.2	1							53024.6	1
																																						44255.2	1	67654.5	1							53072.9	1
																																						44489.6	1	67837.2	1							53079	1
																																						44553.9	1	67840.2	1							53144.7	1
																																						44639.2	1	68035	1							53150.4	1
																																						44767	1	68081.3	1							53232.7	1
																																						44926.2	1	68257.2	1							53250.9	1
																																						45120.9	1	68361.4	1							53312.3	1
																																						45165.1	1	68567.3	1							53382.1	1
																																						45207.5	1	68591.6	1							53485.4	1
																																						45404.2	1	68820.1	1							53622.2	1
																																						45661.7	1	68828	1							53778.5	1
																																						45683.9	1	69079.5	1							53993.5	1
																																						45931	1	69092.5	1							54075.1	1
																																						45980.4	1	69342.5	1							54294.8	1
																																						46214	1	69456.3	1							54407.9	1
																																						46336.8	1	69553.4	1							54596.8	1
																																						46440.6	1	69717.2	1							54961.8	1
																																						46650	1	69775.2	1							55290	1
																																						46712.8	1	69911.5	1							55550	1
																																						46919.3	1	69980.4	1							55910.1	1
																																						46982.1	1	70072.5	1							56408.8	1
																																						47192	1	70092.4	1							56466.2	1
																																						47280.7	1	70134.7	1							56494.5	1
																																						47291.2	1	70318.8	1							56668.4	1
																																						47566.8	1	70514.4	1							56865.1	1
																																						47750.1	1	70674	1							57144.4	1
																																						47796.5	1	70809.8	1							57429.2	1
																																						48065.7	1	70942.1	1							57811.1	1
																																						48172	1	71108.6	1							58199.3	1
																																						48181.4	1	71245.8	1							58522.2	1
																																						48339.3	1	71406.9	1							59003.6	1
																																						48526.1	1	71653.6	1							59473.6	1
																																						48547.4	1	71877.4	1							60002.7	1
																																						48857.7	1	72031.6	1							60509.1	1
																																						48995.8	1	72165.1	1							61030.6	1
																																						49254.1	1	72325.3	1							61787.3	1
																																						49633.9	1	72434.2	1							62256	1
																																						49834.7	1									62661.4	1
																																						50112.9	1									63121.1	1
																																						50619.8	1									63455.5	1
																																						50734.7	1									63637.4	1
																																						50860.5	1									63791.7	1
																																						51054.3	1									64045.7	1
																																						51113	1									64434.2	1
																																						51164.5	1									64771.2	1
																																						51170.2	1									65234.3	1
																																						51312.9	1									65621.1	1
																																						51563.1	1									65832.7	1
																																						52006.7	1									66108.8	1
																																						52179.6	1									66349.6	1
																																						52432.2	1									66696.2	1
																																						52828.5	1									67243.9	1
																																						53109	1									67704.7	1
																																						53248.9	1									68192.9	1
																																						53717.3	1									68797.4	1
																																						54132.7	1									69173	1
																																						54623.3	1									69406.8	1
																																						55011.2	1									69720.5	1
																																						55410.9	1									70122.8	1
																																						55934	1									70572.8	1
																																						56281.1	1									70934.9	1
																																						56930.5	1									71217.1	1
																																						57421.5	1									71459.9	1
																																						57851.5	1									71674.6	1
																																						58182.1	1									71782.4	1
																																																72011.5	1
																																																72087.1	1
																																																72369.7	1
																																																72427.8	1
																																																72434.4	1
																																																72558.7	1








































































































[truncated: 392 more columns]
