# Supplementary material for: FluoEM, virtual labeling of axons in three-dimensional electron microscopy data for long-range connectomics
Source: eLife journal article supplement (doi:10.7554/elife.38976), 2018-08-14
Supplement: supp [file elife-38976-supp-v1.zip › elife_poa_e38976_Figure_1_source_data_2.xlsx]

## Sheet: Sheet1
uniqueFraction_binDists	uniqueFraction_binFracs	ax001_dist	ax001_counts	ax002_dist	ax002_counts	ax003_dist	ax003_counts	ax004_dist	ax004_counts	ax005_dist	ax005_counts	ax006_dist	ax006_counts	ax007_dist	ax007_counts	ax008_dist	ax008_counts	ax009_dist	ax009_counts	ax010_dist	ax010_counts	ax011_dist	ax011_counts	ax012_dist	ax012_counts	ax013_dist	ax013_counts	ax014_dist	ax014_counts	ax015_dist	ax015_counts	ax016_dist	ax016_counts	ax017_dist	ax017_counts	ax018_dist	ax018_counts	ax019_dist	ax019_counts	ax020_dist	ax020_counts	ax021_dist	ax021_counts	ax022_dist	ax022_counts	ax023_dist	ax023_counts	ax024_dist	ax024_counts
0	0	1388.53	214	1820.4	214	708.813	214	2359.46	211	2356.07	210	1974.61	212	1408.91	214	2419.75	206	3198.51	197	3173.65	196	2974.09	205	3778.08	191	1817.04	214	3127.84	194	1094.04	214	2666.16	205	1710.83	214	2846.94	202	1437.85	214	1330.32	214	2130.09	212	1411.93	214	1940.37	214	1112.83	214
2500	0	1407.33	214	1914.48	212	816.088	214	2420.58	210	2391.37	210	1986.72	212	1454.77	214	2438.69	206	3279.14	195	3238.33	192	2991.73	200	3875.41	187	1920.52	214	3256.31	192	1290.27	214	2680.54	203	1767.91	214	2912.12	199	1797.68	214	1337.66	214	2152.96	212	1413.4	214	2012.89	213	1188.97	214
5000	1	1518.94	214	1964.41	212	877.642	214	2483.28	208	2509.95	209	1990.99	211	1456.55	214	2479.01	205	3370.01	191	3250.16	186	3082.32	199	3925.47	181	2033.78	213	3327.29	186	1322.23	214	2992.31	201	1963.05	214	2957.51	199	1848.55	214	1468.17	214	2186.93	212	1595.1	214	2111.08	213	1222.18	214
7500	10	1631.16	214	2269.52	209	1060.63	214	2503.52	206	2535.5	209	2004.25	211	1620.18	212	2524.68	205	3440.9	188	3250.6	185	3133.13	187	3987.56	179	2156.96	211	3362.1	185	1402.97	214	3005.51	199	1986.28	213	3003.86	198	2163.46	213	1557.83	214	2201.47	211	1680.86	214	2190.09	211	1383.13	214
10000	22	1730.08	212	2333.93	209	1104.33	214	2845.82	200	2684.41	207	2011.85	211	1705.52	212	2578.02	205	3482.25	181	3272.92	180	3298.49	181	4389.79	153	2188.74	210	3401.34	184	1408.1	214	3118.66	195	2176.01	211	3049.82	195	2291.37	209	1702.48	214	2257.95	206	1765.63	214	2337.57	209	1542.64	214
12500	53	1769.34	212	2470.54	204	1371	214	2954.05	195	2796.95	202	2043.7	211	1879.26	212	2733.81	201	3618.07	176	3499.89	169	3464.43	168	4401.07	136	2220.13	206	3486.06	183	1447.58	214	3125.76	191	2365.37	209	3086.26	193	2517.4	205	1860	214	2344.58	205	2117.07	212	2344.55	207	1665.58	214
15000	74	1770.23	212	2536.09	202	1522.53	214	3115.33	189	2836.19	200	2065.19	211	2037.39	212	2748.42	197	3785.39	169	3512.39	161	3525.1	166	4669.79	126	2261.64	206	3685.66	179	1482.43	214	3331.88	190	2526.65	202	3269.07	189	2669.97	190	1996.84	213	2381.6	203	2288.1	209	2462.19	206	1827.71	213
17500	107	1823.88	212	2654.04	198	1616.93	214	3179.64	188	2893.92	198	2134.42	210	2164.16	209	2829.3	193	3904.72	156	3853.12	158	3780.38	159	4715.22	116	2629.21	196	3804.81	169	1688.81	213	3547.8	189	2616.36	196	3343.72	185	2768.23	186	2235.93	212	2676.62	198	2465.38	203	2684.35	202	1935.76	213
20000	133	1837.29	212	2699.76	194	1774.22	214	3204.72	188	2949.88	198	2146.16	210	2297.9	209	2842.38	192	4411.79	150	3854.32	152	3808.63	155	4903.96	109	2712.66	187	3864.86	163	1845.54	213	3762.26	175	2969.27	191	3420.08	177	3036.38	179	2462.46	211	2888.81	190	2970.7	186	2693.38	197	2088.9	212
22500	155	1868.84	212	2815.07	190	2017.46	214	3292.55	179	2998.78	195	2147.33	208	2481.22	205	3020.97	186	4737.43	136	4089.84	146	4028.93	151	4932.13	108	2994.45	176	4314.63	150	1881.25	213	3857.25	173	3021.95	182	3429.25	174	3223.98	172	2599.99	206	2948.02	186	3276.26	171	2958.33	191	2192.85	210
25000	170	1880.79	212	2966.45	182	2135.93	211	3445.76	175	3012.1	195	2262.66	207	2592.14	200	3114.55	179	4781.97	117	4129.19	141	4272.02	146	5093.91	97	3100.76	172	4385.59	141	2120.3	212	4257.02	160	3307.65	178	3557.12	166	3601.64	170	2600.38	200	3351.16	182	3396.91	161	3097.86	185	2194.2	206
27500	182	1925.58	212	2986.53	180	2374.97	210	3640.69	165	3095	193	2278.01	206	2794.76	197	3238.84	172	5470.17	102	4257.38	137	4303.12	137	5275.05	86	3615.19	161	4745.71	126	2137.38	210	4644.64	138	3509.99	163	3720.02	162	3740.02	157	3285.22	188	3512.41	169	3930.69	147	3250.23	180	2254.79	206
30000	188	2044.27	212	3118.94	176	2407.25	206	3762.45	162	3216.54	192	2285.71	206	2819.97	188	3411.06	166	5521.77	79	4465.1	125	4658.06	116	5431.06	80	3650.37	156	4805.76	115	2249.9	208	4689.54	118	3856.73	156	3814.79	153	4238.11	136	3494.89	175	3757.74	166	3932.74	139	3365.05	169	2467.6	201
32500	193	2046.38	211	3278.31	172	2635.44	200	4119.92	155	3262.17	184	2422.99	205	2963.83	184	3453.85	165	5991.07	68	4657.99	120	4834.56	109	5820.79	66	4162.7	133	4847.2	103	2294.29	205	4881.12	113	3978.67	140	4047.27	145	4668.23	116	4061.62	159	3980.89	143	4156.8	136	3769.53	153	2580.7	193
35000	193	2316.87	209	3433.43	163	2672.23	197	4260.25	146	3368.75	183	2497.44	202	3016.32	179	3499.09	165	6537.53	48	5055.31	98	5113.93	95	6001.45	45	4274.24	121	4886.49	103	2344.58	205	4957.34	106	4252.22	131	4114.3	137	4712.59	98	4112.52	128	4189.15	116	4274.31	132	3816	142	2721.57	188
37500	197	2496.35	207	3795.66	152	2965.58	190	4419.73	141	3406.77	176	2527.67	198	3116.44	178	3523.06	157	6548	39	5127.71	86	5437.8	84	6020.01	42	4657.76	104	5040.93	97	2702.27	200	5078.27	101	4508.44	109	4321.6	126	5162.36	86	4657.87	103	4552.51	94	4643.26	122	4213.93	135	2799.22	187
40000	199	2685.45	202	3864.24	148	3082.25	182	4540.32	133	3478.61	171	2780.61	195	3442.75	174	3612.94	154	7145.88	31	5351.57	75	5687.66	68	6271.23	30	4834.05	89	5102.05	83	2849.97	191	5372.8	86	4648.45	83	4521.88	111	5650.73	73	4757.94	73	4773.12	74	4795.98	95	4299.55	128	2948.93	184
42500	201	2739.6	199	4105.3	143	3287.5	170	4924.62	121	3654.78	161	3092.86	189	3502.56	167	3619.31	153	7323.97	21	5687.71	67	6011.7	58	6614.13	25	5229.04	75	5317.96	70	3025.33	187	5506.18	77	4948.22	74	4547.3	107	5725.01	54	5170.55	60	5263.19	50	5217.5	72	4746.86	122	3075.05	181
45000	202	3046.04	191	4175.9	139	3572.96	163	4935.84	113	3672.51	158	3300.63	182	3831.06	160	3724.95	148	7921.96	17	5721.17	59	6311	47	6633.47	20	5402.35	67	5417.69	63	3191.66	178	5777.22	68	5330.12	63	4812.73	99	6063.36	46	5347.32	46	5670.97	34	5344.46	64	4750.12	112	3452.16	171
47500	204	3075.19	182	4208.72	134	3577.81	154	5371.03	102	3784.04	151	3350.9	172	3922.33	147	3766.41	148	8010.12	15	6177.86	48	6597.04	39	7017.17	19	5832.65	51	5722.44	54	3415.03	175	6100.22	60	5517.1	45	4900.5	88	6312.43	36	5835.92	36	5957.78	31	5873.78	55	5153.87	99	3453.75	163
50000	205	3371.15	175	4245.37	128	3791.03	151	5654.28	92	3916.95	147	3614.13	161	4170.93	138	3837.77	147	8590.87	13	6369.74	38	6862.92	32	7407.78	17	5869.75	45	5870.8	40	3499.39	172	6171.94	53	5810.34	41	5049.28	80	6615.53	30	6007.21	31	6208.93	29	5911.23	46	5296.57	89	3985.52	146
52500	205	3617.68	163	4529.85	123	3938.23	137	5657.3	77	3953.16	142	3790.58	155	4214.32	132	3856.54	135	8745.7	12	6813.26	27	7358.24	26	7484.56	12	6460.83	38	5920.04	31	3810	159	6357.38	49	6093.03	36	5236.58	67	6734.94	27	6557.11	26	6704.05	20	6419.5	38	5521.85	81	4373.67	135
55000	205	3754.16	149	4793.41	108	4463.95	116	5978.04	73	4000.63	135	3953.32	136	4524.19	125	3862.7	135	9245.55	10	7070.85	20	7381.4	22	7888.71	12	6475.18	37	6457.93	23	4117.59	141	6648.66	42	6309.82	34	5395.73	55	7177.82	27	7132.17	23	6807.39	18	6463.77	33	5866.15	69	4374.34	111
57500	205	3944.28	145	4893.13	97	4533.27	92	6315.16	66	4097.98	131	4252.22	116	4572.68	113	3996.29	126	9452.35	8	7516.92	16	7910.14	16	8024.28	9	7124.66	31	6504.18	19	4253.42	130	6761.49	33	6726.7	25	5662.19	46	7370.24	21	7147.13	17	7140.93	18	6932.19	28	5967.01	60	4757.1	105
60000	207	4071.24	132	5101.37	90	4804.03	82	6390.95	59	4202.28	125	4648.63	105	4876.8	100	4074.31	125	10036.8	7	7922.82	15	8083.74	13	8419.53	7	7174.6	27	6807.97	14	4675.78	107	6953.01	27	6792.6	22	5773.25	40	7732.22	20	7849.26	14	7273	14	6933.8	26	6346.82	57	4954.47	94
62500	207	4207.01	124	5174.44	84	4979.58	69	6450.33	47	4290.65	122	4764.42	85	4946.87	97	4198.73	115	10778.3	5	7976.47	12	8331.26	13	8554.16	7	7785.26	23	7116.28	10	4983.92	97	7222.97	22	7261.19	22	6071.26	32	7797.57	15	8060.52	12	7453.03	14	7343.25	24	6360.78	50	5097.85	86
65000	207	4351.25	113	5494.51	79	5175.38	64	6466.01	40	4324.5	112	4991.84	81	5208.44	88	4255.33	114	10998.5	4	8492.49	9	8788.07	12	8797.8	7	8003.82	14	7173.64	9	5163.57	86	7400	20	7307.96	19	6235.66	27	8168.08	14	8547.68	9	7819.15	13	7647.28	22	6576.41	46	5551.33	70
67500	207	4506.79	106	5853.8	75	5270.02	58	6494.75	40	4417.3	108	5292.31	75	5260.4	80	4508.78	113	11699.4	4	8505	9	8813.47	11	9201.03	6	8354.36	13	7732.59	6	5531.11	79	7652.43	16	7760.39	19	6576.02	24	8387.28	11	8836.28	8	7964.25	12	7697.24	22	6833.61	40	5858.02	58
70000	207	4598.88	101	5883.72	67	5628.82	51	6505.07	39	4539.21	107	5354.06	67	5470.01	73	4513.75	100	11700.7	4	9037.02	9	9204.38	10	9419.17	5	8458.95	13	7853.7	5	5654.13	68	7818.85	16	8060.65	16	6736.28	23	8553.64	11	8992.87	7	8255.97	10	8116.73	18	6924.84	34	6170.63	41
72500	207	4804.81	93	6336.97	62	5653.06	49	6585.68	36	4696.11	98	5596.39	64	5472.54	71	4757.27	94	12243.4	2	9055.75	9	9220.53	10	9621.94	5	9010.88	13	8297.56	4	5931.5	61	8095.99	16	8333.12	14	7121.22	21	8932.65	11	9573.67	5	8323.05	10	8186.51	16	7224.04	32	6301.51	32
75000	207	4965.35	89	6451.73	57	6168.01	47	6854.7	31	4813.54	92	6019.46	52	5734.46	64	4799.65	88	12430.7	2	9521.14	7	9614.22	10	9999.97	5	9676.15	13	8687.88	3	6078.49	56	8285.47	14	8532.04	11	7178.42	13	9088.38	11	9808.85	5	8889.18	9	8661.67	13	7248.4	31	6640.43	25
77500	207	4997.25	86	6761.57	48	6445.28	38	6969.68	24	4916.34	79	6164.5	49	5760.91	59	4992.01	86	13031.7	2	9608.47	7	9620.87	10	10038.1	5	9810.97	11	8888.11	3	6544.15	48	8740.07	10	8854.46	11	7586.03	13	9365.3	6	10010.1	5	8979.41	9	8692.31	13	7628.08	30	6717.44	18
80000	207	5327.43	83	6977.04	44	6455.26	36	7342.48	21	4970.33	75	6410.53	46	5978.36	57	5091.71	77	13228.8	2	10004.5	7	9997.04	9	10374.7	5	10430.7	10	9503.55	3	6642.84	37	8993.41	9	8925.48	11	7676.34	12	9385.27	6	10671	5	9491.45	9	9213.07	12	7764.48	25	7013.23	14
82500	207	5474.76	66	7280.69	37	6845.99	32	7385.55	19	5112.2	68	6583.27	43	6061.79	53	5253.33	71	13761.3	2	10467.4	5	10177.2	6	10537.5	5	10493.7	10	9560.83	3	7010.72	32	9283.41	9	9486.93	10	8116.23	10	9422.64	6	10885.5	5	10067.9	8	9280.62	11	8055.23	22	7158.78	7
85000	207	5626.07	58	7734.71	32	7021.28	30	7571.51	19	5215.64	62	6799.94	43	6207.94	51	5395.95	68	13911.9	2	10492	5	10326.3	6	10581.2	5	11004.2	9	10006.5	3	7221.18	28	9424.42	9	9563.6	10	8174.48	9	9491.94	5	11363.1	5	10235.8	7	9797.62	10	8315.97	22	7601.8	6
87500	207	5847.19	54	7841.15	29	7135.8	29	7816.23	16	5344.21	61	7034.59	43	6344.37	49	5538.76	65	14550.6	1	11150.2	5	10566.5	6	10792.6	5	11021.3	8	10273.9	3	7533.73	26	9925.89	8	9997.69	8	8628.07	9	9957.14	5	11990	2	11180.1	4	9953.3	9	8345.39	21	7909.17	5
90000	207	5947.03	45	8382.16	29	7226.85	29	7907.14	16	5491.54	45	7079.89	36	6596.94	47	5706.56	60	14558.7	1	11595	4	10669.9	6	10941	5	11533.6	8	10605.2	3	7776.04	23	10514.3	7	10294.3	7	8664.21	9	10152	4	12063.4	2	11447.5	4	10291	9	8528.83	20	8095.47	4
92500	207	6165.44	41	8602.09	24	7240.31	29	8409.58	13	5504.23	39	7094.92	36	6632.27	45	5779.04	57	15059.1	1	11763.1	4	10939.2	6	11271.7	5	11573	7	10997.9	3	8098.79	19	10562.4	7	10456.6	6	9149.04	7	10374.2	4	12390.8	2	12068.2	4	10589	9	8750.79	19	8575.93	4
95000	207	6511.58	31	8817.97	23	7556.78	24	8813.43	10	5668.23	36	7405.9	33	6888.52	43	5875.15	54	15345.6	1	12443.8	3	11139.9	6	11395.8	5	11984	7	11090.5	2	8227.26	17	11189.9	6	10869.3	6	9389.28	7	10761	4	12880.5	2	12068.3	4	11311.7	9	8760.05	19	8725.74	3
97500	207	6543.04	28	8822.38	22	7604.6	21	8886.73	5	5766.81	35	7789.06	25	6925.79	40	6099.09	51	15771.2	1	12555.7	3	11438	6	11848	5	12057.9	6	11432.3	2	8632.55	13	11542.2	5	10911.4	6	9552.34	6	10956	4	13081.1	2	12488.2	4	11449.9	8	8936.3	18	9121.47	3
100000	207	6907.37	26	9358.1	19	7736.84	20	9202.22	3	5846.8	34	8135.73	21	7133.91	38	6138.16	50	15908.6	1	12990.2	3	11591.7	5	12068.1	4	12477.3	5	11756.1	2	8670.71	9	11813.2	5	11458.5	6	9818.65	5	11349	4	13480.6	2	12675.8	4	11921.4	7	9141.53	18	9123.71	3
		6912.43	21	9446.38	18	7746.66	19	9247.64	3	5969.13	34	8292.6	21	7174.07	35	6337.57	50	16441	1	13189.2	3	11979.5	5	12597.6	3	12758.6	3	11815.8	2	8927.65	8	12426.9	3	11474	6	9929.45	5	11487.1	3	14106.7	2	12973.3	4	12148.9	7	9153.04	18	9390.09	3
		7099.06	20	9851.15	17	7780.53	19	9459.36	3	5978.08	27	8579.87	20	7420.56	34	6450.71	49	16775	1	13378.2	3	12100.2	5	12954.6	3	12851.1	3	12203.4	2	9278.3	8	12452.8	3	11886.3	6	10132.8	5	11801.7	3	14305.3	2	13056.8	4	12565.5	7	9344.52	18	9574.56	2
		7276.8	20	10014.2	16	7882.1	17	9677.43	3	6090.86	26	8707.15	18	7694.81	33	6535.85	40	16997.5	1	13763.5	3	12522	5	13127.1	3	13282.9	3	12423	2	9419.42	7	12995.9	3	12010.6	5	10393.6	5	12060.2	2	15105.8	1	13466.9	4	12865	7	9548.87	17	9610.06	2
		7280.39	17	10272.4	14	8035.92	17	9876.9	3	6228.18	23	9174.26	16	7800.59	31	6627.67	38	17280.3	1	13823.5	3	12575	4	13595.8	3	13454.8	3	12735.7	2	9892.9	7	13322	3	12317.2	4	10547.9	4	12223.8	2	15363.9	1	13562.7	3	13010.5	6	9600.18	15	9780.14	1
		7546.51	17	10632.8	13	8149.94	14	10088.5	3	6357.16	22	9338.51	12	8027.64	31	6790.11	37	17456.3	1	14276.7	3	13011.1	4	13647.3	3	13759.5	3	12894.5	2	9942.03	6	13513.6	3	12471.7	3	10645.7	4	12552.3	2	15634	1	13883.8	3	13440	6	9952.37	15	9822.39	1
		7648.62	16	10802.8	13	8189.21	14	10240.6	3	6521.79	16	9796.8	11	8080.29	30	6922.7	33	17532.5	1	14442.4	3	13213	4	14059.9	3	14151.6	2	13308.4	1	10389.2	6	14075	3	12852.2	3	10718.1	4	12576.4	2	16284.8	1	13903.8	3	13443.7	6	10108.9	13	10141.3	1
		7863.44	14	11255.5	10	8320.82	13	10503.6	2	6567.99	16	10138.3	10	8417.54	28	6957.68	29	17856.2	1	14760	3	13439.3	4	14319.4	3	14246.7	2	13520.7	1	10410.3	6	14135	3	12993.9	2	10962.2	4	12894.1	2	16481.8	1	14337.3	3	13720.4	6	10206.8	12	10175.4	1
		7932.04	14	11298.3	8	8459.76	13	10911.1	1	6709.33	16	10288.2	9	8666.81	23	7047.4	28	18458.4	1	15061.4	3	13636.2	4	14681.5	3	14773.2	2	13754.5	1	10774	6	14628.5	3	13450.4	2	11269.5	3	13028.9	2	17001.6	1	14456.4	3	14077	5	10528.2	12	10582.6	1
		8269.99	13	11690.5	8	8646.94	13	10938.3	1	6832.93	15	10762.9	9	8793.21	22	7174.77	28	18598.5	1	15430.2	3	13834.1	4	15148.3	3	14818.8	2	13868.6	1	10936.1	6	15025.3	3	13517.4	2	11277.9	3	13327.7	2	17690.5	1	14894.3	2	14405.2	4	10633.4	9	10757.1	1
		8280.96	12	11824.7	7	8994.92	12	11346.2	1	7004.09	13	10837.7	9	8948.11	21	7246.86	25	19157.9	1	15891.4	2	14121.5	4	15390.5	3	15160.9	2	14111.7	1	11286.6	6	15530.2	3	13963.1	2	11509.6	3	13449.9	2	17907.7	1	15255.3	2	14746	3	10895.3	9	10922.3	1
		8641.77	9	12003.3	7	9009.37	11	11761.9	1	7007.53	13	11351.4	8	9055.59	20	7291.06	25	19495.8	1	16063.9	2	14318	4	15537.4	3	15537.2	2	14430.1	1	11640.1	5	15934.9	3	13984	2	11797.8	3	13842.8	1	18753.9	1	15586.5	2	14969.4	2	10950.7	9	11113	1
		8755.1	9	12429.9	6	9305.91	9	12155	1	7171.26	13	11593.9	7	9070.01	16	7395.88	25	19951.2	1	16596	2	14545.4	4	15908	3	15728.1	2	14662.4	1	11861.7	5	16164.6	3	14442.3	2	12076.2	3	14042.3	1	18898.9	1	15954.6	2	15267.8	1	11089.7	9	11371.2	1
		8995.82	9	12503.9	5	9338.88	8	12474.7	1	7298.14	13	11883.8	7	9193.82	15	7478.17	25	20489.5	1	17010.4	2	14764.3	4	16080.1	3	16192.1	2	15021.5	1	12147	5	16774.5	3	14686.5	2	12225.6	3	14280.6	1	19961	1	16240.9	2	15453.6	1	11397.2	8	11460.1	1
		9199.56	8	12917.1	5	9495.09	7	12484	1	7413.64	12	12050.1	6	9546.22	14	7509.9	25	20675.2	1	17047	2	15148.5	3	16499.5	3	16211.8	2	15269.5	1	12226.2	5	16961.8	3	14882.7	2	12741	3	14388.7	1	20143.4	1	16648.7	2	15788	1	11451.3	7	11757	1
		9473.71	7	13174.4	5	9644.78	6	12924.6	1	7479.82	12	12248.1	6	9595.96	13	7673.68	24	21241.2	1	17476.9	1	15340	3	16599.9	3	16756.7	2	15585	1	12706.8	5	17545.5	3	15315.1	2	13047.9	3	14830.2	1	20451.3	1	16714.3	2	15870.6	1	11779.5	7	11945.4	1
		9646.09	7	13756.9	5	9705.81	5	13345.9	1	7519.52	12	12505	6	9859.34	12	7739.51	23	21306.7	1	17655	1	15980.2	3	16871.4	3	16871.8	2	15896.1	1	12809.8	5	17967.7	2	15346.1	2	13121.4	3	15086.2	1	21174.6	1	17131	2	16305.5	1	11809.8	7	12246.4	1
		10057.3	6	13806.7	5	9907.36	5	13380.2	1	7666.53	11	12628.6	6	9922.88	11	7833.94	23	21826.8	1	17905.8	1	16047.8	3	17122.6	3	17384	2	16192	1	13372.5	5	18108.1	2	15670.6	2	13490.5	3	15182.7	1	21459.3	1	17534.6	2	16437.7	1	12158	7	12475.8	1
		10265.8	6	14210.4	5	9937.86	5	13448	1	7810.38	11	12920.8	6	10209.5	10	7916.08	23	22091.6	1	18258.4	1	16470.9	3	17316	3	17445.7	2	16470.7	1	13469.3	5	18611.8	2	15914.1	2	13544.9	3	15585.8	1	21983.8	1	17595	2	16595.2	1	12213.2	6	12732.2	1
		10501.6	6	14212.9	5	10055.2	5	13610	1	7997.66	11	13058.1	6	10411	9	7954.66	23	22441	1	18528.4	1	16710.2	3	17659.2	3	17893.5	2	16494.2	1	14077.7	5	19020.5	2	15935.9	2	13985.5	3	15939.7	1	22000.7	1	18616.4	2	16967.3	1	12613.8	5	12879.5	1
		10514.6	6	14528.6	5	10151	5	13673	1	8061.44	11	13303	6	10519	9	8033.81	23	22750.2	1	18836.2	1	16824.8	3	17756	2	18017.8	2	16851.1	1	14220.5	5	19152.4	2	16231.2	2	14137.4	3	16170.6	1	22225.7	1	18789.8	2	17057.2	1	12667.9	4	13531.2	1
		10940	5	14836.7	5	10371.4	5	13682.2	1	8343.45	11	13543.1	6	10732.2	8	8106.22	19	23114.4	1	19189.2	1	17131.5	3	18097.3	2	18462.7	2	16870.3	1	14913.7	5	19676.2	2	16587.3	2	14481	3	16475.2	1	22644.9	1	19314.6	2	17523.5	1	13098.3	3	14193.9	1
		11106.6	5	14857.4	5	10466.7	5	13705.1	1	8541.38	11	13613.5	5	10869	7	8135.27	19	23261.7	1	19537.1	1	17227.3	3	18133.7	2	18510.6	2	17403.6	1	14986.6	5	20205	2	16854.6	2	14746.1	3	16530.8	1	22789.6	1	19428.9	2	17688.7	1	13194.2	3	14683.8	1
		11319	5	15094.6	5	10903.8	3	13720.9	1	8644.07	11	14158.5	5	11095.8	7	8246.03	19	24148.6	1	19793	1	17295.1	3	18478.1	1	18968.2	2	17524	1	15373.6	5	20434.4	2	17245.4	2	14919.6	3	16972	1	23249.4	1	20093.4	1	18062.2	1	13533.5	3	15185.9	1
		11344.9	5	15325.5	5	10952.2	3	13728.6	1	8693.81	11	14222.5	5	11233.1	6	8269.08	19	24163.6	1	20054.2	1	17421	3	18522.3	1	19090.6	2	17816.7	1	15851.5	5	20690.3	2	17396.7	2	15265.2	3	17022.3	1	23636.9	1	20136.2	1	18331.3	1	13854.9	3	16012.6	1
		11650.1	4	15335.6	5	11437.8	3	13732.3	1	8853.17	9	14925.5	5	11489.6	6	8276.91	19	24806.2	1	20547.9	1	17699	2	18820	1	19657.4	2	18138.2	1	15882.3	5	21079.7	2	17774.2	2	15303.7	3	17424.9	1	23677	1	20682.5	1	18399.9	1	14331.5	2	16462.4	1
		11712.1	3	15733.2	5	11464.9	2	13768.6	1	9069.73	9	14930.2	5	11639.3	5	8333.4	19	25819.1	1	20641	1	17940.9	2	18916.8	1	20107.4	2	18370.9	1	16276.5	5	21516.4	2	17788.1	2	15658.2	3	17561.2	1	24222.7	1	20807.5	1	18817.2	1	14429.5	2	16990.5	1
		12045.2	3	15786.7	5	11875.9	2	13791	1	9170.68	9	15196.2	5	11777.6	5	8339.75	18	26088.7	1	21069	1	18253	2	19101.7	1	20205.6	2	18567.1	1	16635.8	4	21800	2	18234.5	2	15795.2	3	17982.5	1	24254.3	1	21189.5	1	18997.6	1	14791	2	17359.1	1
		12101.5	3	15982.4	5	12023.3	2	13851.1	1	9271.03	9	15253.8	5	11923.5	5	8391.84	18	27591.4	1	21317.6	1	18610.6	2	19396	1	20745.8	2	19033	1	17380.7	4	22062.8	2	18577	2	16093.4	3	18080.8	1	24638.3	1	21822.1	1	19356.2	1	14918.7	2	17823.7	1
		12387.7	3	16354.4	5	12221.2	2	13864.5	1	9406.38	9	15406.3	4	12068.8	4	8392.53	16	27657.9	1	21554	1	18708.8	2	19553	1	21045.5	2	19133.3	1	17504.4	4	22266	2	18880.7	2	16126.9	3	18385.6	1	24701.3	1	21957.5	1	19531.6	1	15139.2	2	18191.4	1
		12436.4	3	16365.9	5	12530.9	1	13870	1	9642.69	9	15532.2	4	12199.2	4	8393.15	16	28178.5	1	22155	1	19296.1	2	19821	1	21455.3	2	19530.7	1	17991.2	4	22505.4	2	18981.2	1	16543.6	3	18632.2	1	25142.7	1	22288.5	1	19854.5	1	15417.8	2	18919.9	1
		12572.6	3	16783.8	3	12651.3	1	13878.1	1	9694.61	9	15951.5	4	12335.7	4	8501.87	16	28484.4	1	22326.8	1	19525.2	2	20016.5	1	21846	2	19683.6	1	17991.5	4	22866.8	2	19385.4	1	16608.1	3	18869.9	1	25171.5	1	22717.1	1	20182.2	1	15618.9	2	19325.6	1
		12592.5	3	17298	3	12937.2	1	13913.6	1	9928.3	9	16016.4	4	12515.7	4	8510.2	15	29099.7	1	22736.2	1	19852.7	2	20156.9	1	22053	2	20029.1	1	19046.4	2	22928.8	2	19469.4	1	16875	2	19180	1	25545.4	1	22793.9	1	20240.6	1	15874.8	2	19784.9	1
		12884.7	3	17586	3	13083.9	1	13964.4	1	10102.6	8	16210.6	4	12673.1	4	8530.76	14	29302.6	1	22891.1	1	20244.7	2	20587.8	1	22594.7	1	20231.3	1	19147.3	2	23154.3	2	19855.5	1	16982.4	2	19354.2	1	25785	1	23302.4	1	20497	1	16044.8	1	20321.3	1
		12904.9	2	18026	3	13263.6	1	13969.8	1	10139.1	8	16530.4	4	12696.6	4	8554.01	14	30059.2	1	23316.4	1	20418.9	2	20754.6	1	22843.8	1	20396	1	19709.1	2	23593.2	2	19860.8	1	17356.4	2	19773.1	1	26069.9	1	23737	1	20710.8	1	16289.8	1	20804.4	1
		13202.4	2	18463.6	3	13324.3	1	13970.9	1	10424.3	8	16602.8	4	12826	4	8616.27	14	30821.1	1	23688.3	1	20805	2	20837	1	23054.5	1	20864.8	1	19914.5	2	23990.1	2	20374.4	1	17371.4	2	19855.2	1	26473.6	1	23867.3	1	21030.4	1	16528.6	1	21239.3	1
		13290.8	2	18725.4	3	13548.4	1	13979.6	1	10642.7	8	16817.9	4	12987.5	4	8633.34	14	30965.9	1	23704.8	1	20950.6	2	21206.6	1	23554.1	1	20869.9	1	20482.5	2	24216.7	2	20449.8	1	17806	2	20294.6	1	26701.3	1	24459.8	1	21262.9	1	16643.4	1	21640	1
		13557.5	2	19097.2	3	13749.7	1	14130	1	10644.8	7	17095.4	3	13157.9	3	8670.15	14	31378.5	1	24031.9	1	21362.4	2	21347.1	1	23596.2	1	21259.1	1	20561.5	2	24760	2	20779.8	1	17913.4	2	20378.3	1	27155.4	1	24459.9	1	21430.9	1	16984.5	1	22070.6	1
		13718.8	2	19281.5	3	13952	1	14131.1	1	10793.9	7	17104.3	2	13321.4	3	8726.38	14	31719.2	1	24134.5	1	21414	2	21597.2	1	24088.9	1	21372.3	1	21008.6	2	25155.8	2	20949.5	1	18279.7	1	20774.4	1	27220.7	1	25031	1	21879.3	1	17213.1	1	22484.4	1
		13808.6	2	19755.8	3	14216.5	1	14245.6	1	10966.8	7	17437.5	2	13348.3	3	8783.7	11	32004.2	1	24400.5	1	21748	2	21968.6	1	24356.5	1	21626.7	1	21188	2	25264.1	2	21247.9	1	18382.6	1	20821	1	27693.7	1	25293.3	1	22061.6	1	17609.7	1	22793.2	1
		14176.5	2	20084.5	3	14313.8	1	14251.9	1	11154.9	6	18028.4	2	13576.8	3	8869.3	11	32522.6	1	24784.5	1	21819.3	2	21970.8	1	24675.2	1	21936.9	1	21523	2	25669.3	2	21525.2	1	18728.1	1	21306	1	27972.3	1	25643.5	1	22377.8	1	17915.9	1	23396.2	1
		14308.8	2	20291.9	2	14706.1	1	14274.9	1	11191.4	6	18721.6	2	13930	3	8913.16	10	32604.9	1	24828.3	1	22274.7	2	22418.1	1	25093.7	1	22403.4	1	21863.2	2	25710.8	2	22172.3	1	19004.6	1	21577.5	1	28446.1	1	26113.4	1	22394.3	1	18458.5	1	23827.1	1
		14500	1	20605.3	2	14876.7	1	14356.1	1	11346.2	6	19209.9	2	14211.5	2	8923.47	10	33269.9	1	25285.6	1	22554.7	2	22430.7	1	25233.4	1	22495	1	22001.4	2	25989.7	2	22264.3	1	19152	1	21791.4	1	29078.7	1	26153.5	1	22659.6	1	18818.1	1	24555.9	1
		14802.1	1	21154.7	2	15187.1	1	14489.1	1	11541.2	6	19573	2	14526.6	2	8933.1	10	33393.3	1	25629.8	1	22802.7	2	22756.5	1	25796.1	1	23090.3	1	22245.7	2	26136.4	2	22631.3	1	19253.9	1	22239.2	1	29370.9	1	26746.2	1	22813.3	1	19046.7	1	24976.8	1
		14833.3	1	21573.2	2	15233.8	1	14540.8	1	11707.9	6	19975.8	2	14924.9	1	8934.84	10	33554	1	25842.5	1	22995.1	2	23001.4	1	25938.5	1	23162.2	1	22476.3	2	26200.1	2	22816	1	19543.7	1	22277.4	1	29723.5	1	27312.4	1	22911.7	1	19102.5	1	25437.9	1
		15089	1	21967.7	2	15484.9	1	14775.8	1	11793.2	6	20421.9	2	15134.2	1	8986.29	10	33643.8	1	26271.3	1	23114.3	2	23061.1	1	26511.9	1	23375.6	1	22732.8	2	26253.2	2	23212.1	1	19617.7	1	22576.9	1	30284.5	1	27316.2	1	23124.9	1	19352.5	1	25849	1
		15297	1	22169.8	2	15637.3	1	14830.7	1	12038.2	6	20905.2	2	15458.9	1	9001.39	10	33926.6	1	26331.7	1	23509.6	2	23294.6	1	26800.7	1	23664.6	1	23266.5	2	26274.6	2	23415.9	1	19845.4	1	22905.3	1	30304.2	1	27911.1	1	23381.8	1	19527.9	1	26430.3	1
		15477	1	22264.3	2	15657.5	1	14852.8	1	12202.8	6	21616.7	2	15828.6	1	9126.57	10	34037.8	1	26846.9	1	23682	2	23368.6	1	27266.2	1	23793.3	1	23307.4	2	26309.5	2	23902.2	1	20187	1	22990.9	1	31113.8	1	28427.7	1	23436.1	1	19573.8	1	26735.3	1
		15536.7	1	22358.4	2	15715.3	1	14984.9	1	12295.4	6	22145.5	2	16162.6	1	9129.36	9	34315.5	1	26911.3	1	24025.1	2	23874.4	1	27653.6	1	24062.4	1	23766.7	2	26630.1	2	23968.6	1	20410.2	1	23221.2	1	31190.9	1	28445.6	1	23805.7	1	19955.9	1	27166.6	1
		15701.7	1	22547.3	2	15742	1	15228.2	1	12362.6	6	22684.3	2	16580.4	1	9130.61	9	34532.7	1	27337.6	1	24193.8	2	23906.4	1	27766.3	1	24764.1	1	24001.8	2	26887.7	2	24386.6	1	20507.8	1	23714.2	1	31908.4	1	29060.6	1	24059.6	1	20034.9	1	27827.2	1
		15722.9	1	22789.4	2	15898.5	1	15251.9	1	12572.7	6	23060.5	1	16956.5	1	9141.77	9	34675.1	1	27469	1	24275.5	2	24291.1	1	28306.9	1	25021.9	1	24331.4	1	27036.4	2	24559	1	20850.5	1	23776.2	1	31960.4	1	29475.5	1	24360.6	1	20430.8	1	28274.7	1
		15968	1	22977.7	2	16179.5	1	15356.7	1	12802.1	6	23411.1	1	17310.4	1	9150.75	9	34823.1	1	27714.4	1	24583.1	2	24349.5	1	28546.3	1	25432.2	1	24832.8	1	27124.2	2	25022.5	1	21034.8	1	24199.9	1	32699.6	1	29582	1	24517.9	1	20537.1	1	28710.5	1
		16103.3	1	23157.5	2	16249.3	1	15483.6	1	12920	6	23718.4	1	17558.8	1	9197.58	9	35171.6	1	28116	1	24732.6	2	24759.4	1	28844.3	1	25642.9	1	25008.8	1	27352.8	2	25183	1	21205.8	1	24371	1	32757.1	1	30162.4	1	24747.7	1	20843.3	1	29124	1
		16204.4	1	23487.7	2	16501.6	1	15665.2	1	12936	6	24248.7	1	17978.2	1	9271.75	9	35406.5	1	28364	1	24942.4	2	24862.2	1	29308	1	26145.8	1	25314.2	1	27527.5	2	25544.7	1	21408.3	1	24646	1	33176.1	1	30329.2	1	25075	1	21190.1	1	29517.5	1
		16455.4	1	23823.9	2	16680.8	1	15814.2	1	13116.2	6	24849.6	1	18503.5	1	9349.85	9	35475	1	28639.8	1	25309	2	25013.2	1	29427.1	1	26170.7	1	25536.7	1	27657.5	1	25880	1	21411.1	1	24995.3	1	33537.1	1	30656.4	1	25234.8	1	21484.3	1	29998.7	1
		16546.6	1	24372.8	2	16754.8	1	15824.1	1	13264.5	5	25521.9	1	18721.3	1	9356.46	9	35548	1	28820.4	1	25316.9	2	25356	1	30065.5	1	26683.3	1	26073.4	1	27872.8	1	26202.3	1	21609.1	1	25076.5	1	33670.7	1	30968	1	25736	1	21634.7	1	30740.3	1
		16718.1	1	24610.9	2	17052.8	1	16003	1	13421.2	5	26015.6	1	18957.5	1	9474.79	9	36000.2	1	29176	1	25663.4	2	25597.3	1	30320	1	26734.3	1	26132.5	1	27977	1	26556.5	1	21810.6	1	25455.6	1	34427.5	1	31353.4	1	26090.6	1	21719	1	31303.3	1
		16950.2	1	25432.7	2	17200.2	1	16095.4	1	13583.5	5	26452.4	1	19110	1	9526.79	9	36318.8	1	29332.5	1	26072.5	2	25772.6	1	30897.4	1	27174.6	1	26551.2	1	28329.5	1	26705.1	1	21873.1	1	25851.8	1	34444.7	1	31502.6	1	26334.6	1	21975	1	31761.3	1
		17205.5	1	25736.7	2	17356.9	1	16197.5	1	13596.3	5	26947.1	1	19284.8	1	9573.71	9	36432.2	1	29658.9	1	26265.3	2	26137.2	1	31128.7	1	27479.1	1	26820.4	1	28406.2	1	27007.1	1	22081.5	1	25914	1	35309.5	1	32222.3	1	26886.5	1	22416	1	32309.8	1
		17404.9	1	26112.8	2	17569.9	1	16324.2	1	13777.8	5	27413.2	1	19466.9	1	9608.44	9	36850.5	1	29785.8	1	26829.2	2	26207.7	1	31813.4	1	27614.7	1	27028.6	1	28715.6	1	27369.3	1	22347.7	1	26656.1	1	35499	1	32281.2	1	27002	1	22548	1	32614.5	1
		17519.7	1	26480.4	2	17666.2	1	16332.2	1	13907.7	5	27848.3	1	19733.5	1	9710.71	9	36870.9	1	30103.3	1	27384.4	2	26576.3	1	32172.3	1	28030.7	1	27446.9	1	28918.6	1	27420.4	1	22401.8	1	27027.9	1	35930.1	1	32931.9	1	27503.4	1	22861.2	1	33061.2	1
		17530.7	1	26822	1	17885.2	1	16623.9	1	14080.7	5	28374.4	1	20015.9	1	9741.47	9	37866.5	1	30423.9	1	27683.3	2	26820.1	1	32499.2	1	28281.5	1	27650.6	1	29268.3	1	27827	1	22622.3	1	27359.3	1	36495.7	1	33230.4	1	27805.6	1	23130.3	1	33377.1	1
		17896.3	1	27335.1	1	18276.7	1	16640.6	1	14101.6	5	28898.3	1	20249.4	1	9810.97	9	37895.6	1	30451.7	1	27904.1	2	27077.8	1	33418	1	28764.8	1	27953.9	1	29404.8	1	28094.4	1	22719.4	1	27665.2	1	36497.8	1	33498.8	1	28144.1	1	23227.3	1	33805.2	1
		17910.2	1	28014.1	1	18327.4	1	16709.1	1	14288.9	5	29364.8	1	20500.4	1	9869.03	9	38505.1	1	30800.4	1	28049.5	2	27258.4	1	33458.7	1	29026.5	1	28220.1	1	29930.6	1	28245.6	1	22937.9	1	28170.7	1	37575.4	1	34113.5	1	28569.9	1	23838.3	1	34570.2	1
		18266	1	28484.6	1	18555	1	16929.3	1	14540	5	29900.8	1	20641.2	1	10020.3	9	38693.7	1	31021.1	1	28352.3	2	27340.4	1	34040.7	1	29203	1	28699.2	1	30189.9	1	28772.2	1	22995.3	1	28216.7	1	37637.6	1	34287.2	1	29040.3	1	24184	1	35028.3	1
		18600.4	1	28858.9	1	18681.5	1	16968.7	1	14555.7	4	30351.9	1	20884.3	1	10164.7	9	39348	1	31502.7	1	28490.8	2	27658.9	1	34242.1	1	29585.2	1	28818.6	1	30310.1	1	28797.7	1	23378.2	1	28544.2	1	38849	1	34469.7	1	29157.5	1	24212.1	1	35532.3	1
		18669.9	1	29377.7	1	18686.2	1	17167.4	1	14784.3	4	30714.4	1	21274.8	1	10243.6	8	39596.8	1	31573.9	1	28719.2	2	27836.5	1	34659	1	29906.2	1	28978.8	1	30510.1	1	29090.3	1	23421.8	1	28982.5	1	38987.9	1	34865.9	1	29560.7	1	24490.6	1	35875.1	1
		18915.7	1	29864.8	1	18703.4	1	17337.3	1	14934	4	31119.6	1	21477.2	1	10331.5	8	39954.6	1	32022.1	1	29037.4	2	27976.4	1	35146.3	1	30014.6	1	29310.2	1	30865.8	1	29210.7	1	23843.6	1	28999.2	1	39474.3	1	35166.2	1	29622	1	24711.4	1	36415.9	1
		18977.7	1	30347	1	18787.8	1	17380.7	1	14996.3	4	31364.2	1	21787.1	1	10413.3	8	40224.4	1	32320.6	1	29250.9	1	28355.3	1	35184.1	1	30570.2	1	29662	1	30870.6	1	29258.6	1	24012.8	1	29502	1	39928.1	1	35307.2	1	29877.7	1	24795	1	37245.4	1
		19273.3	1	30725.8	1	18946.1	1	17714.3	1	15242.2	4	31738.4	1	22080.8	1	10481.5	8	40834.2	1	32577.1	1	29435.2	1	28668.2	1	35706	1	30619.4	1	29782.3	1	31369.4	1	29373	1	24299.2	1	30054.7	1	40341.1	1	35875.6	1	29939	1	25101.9	1
		19362.2	1	31252.5	1	19215.3	1	17771.3	1	15303.8	4	31930.5	1	22300.7	1	10607.4	8	41255.7	1	33046.2	1	29820	1	28777.5	1	35799	1	31199.4	1	30164.3	1	31674.5	1	29561.8	1	24339.6	1	30058.9	1	40399.2	1	36027.7	1	30250.5	1	25326.5	1
		19567.2	1	31635.9	1	19471.4	1	18010.5	1	15509.8	4	32320.3	1	22738.2	1	10666.5	8	41301.2	1	33554.8	1	29868.9	1	29321.2	1	36202.3	1	31422.2	1	30276.3	1	32197.8	1	29780.6	1	24656	1	30497	1	40904.6	1	36425.5	1	30301.9	1	25427.3	1
		19647.1	1	32029.1	1	19518.1	1	18130.8	1	15696.1	4	33077	1	23222.6	1	10683.5	7	41732.7	1	34239.1	1	30305.1	1	29900	1	36879.3	1	31825.8	1	30343.1	1	32239.9	1	29838.3	1	24709.4	1	30893.7	1	41288.7	1	36715.5	1	30459	1	25691.3	1
		20017.3	1	32341.2	1	19752.4	1	18196.2	1	15703.2	4	33650	1	23601.2	1	10703.7	7	41978.7	1	34239.2	1	30393	1	30713.1	1	37536.1	1	32396	1	30507.7	1	32713.9	1	30112.2	1	25037	1	31018.8	1	41584.9	1	37103.7	1	30788.4	1	25754.6	1
		20210	1	33204	1	19797.2	1	18487.8	1	15810.2	4	33961.3	1	23834.4	1	10707.5	7	42137.2	1	35010.6	1	30892.9	1	31384.7	1	37566.4	1	32497.9	1	30510.5	1	32833.5	1	30184.6	1	25048.8	1	31317.9	1	42130	1	37531.4	1	31110.4	1	25911.6	1
		20595.7	1	33819	1	20082.7	1	18519.9	1	15951.1	4	34431.6	1	24249.8	1	10773.3	7	42800.2	1	35137.6	1	30973.2	1	31827.2	1	38295.9	1	32855.8	1	30515.6	1	33396.4	1	30411	1	25304	1	31639.6	1	42239.3	1	37587.1	1	31236.1	1	26202.9	1
		20879.4	1	34168	1	20089.6	1	18544.4	1	16101.1	4	34866.5	1	24622.5	1	10803.4	7	42927.7	1	35565.6	1	31376.5	1	32288.6	1	38633.7	1	33108.8	1	30532	1	34150.5	1	30594.3	1	25561.3	1	31914	1	42695.5	1	38031.6	1	31392.4	1	26263.5	1
		21035	1	34823.1	1	20152.6	1	18554	1	16131.7	4	35545.9	1	24989.7	1	10834.3	6	43319.2	1	36008.5	1	31539.3	1	32899.3	1	38860.1	1	33370.1	1	30632.2	1	35022	1	30689.8	1	25593.3	1	32035.2	1	43197.1	1	38369.9	1	31830.2	1	26536.8	1
		21392.3	1	34880.8	1	20276.3	1	18567.6	1	16319.9	4	36287.2	1	25222.2	1	10872.1	6	43787.1	1	36096.1	1	31929.5	1	33399	1	39514.4	1	33455.3	1	30987	1	35739.2	1	30875.2	1	25934.1	1	32371.7	1	43487.9	1	38569.1	1	32013.2	1	26580.9	1
		21480.5	1	35007.1	1	20430	1	18785.6	1	16486.9	4	36583.8	1	25572.7	1	10878.4	6	43822.7	1	36633.3	1	32067.6	1	34059	1	40297.7	1	33732.9	1	31679.7	1	36168.4	1	30953.9	1	26148.5	1	32614.7	1	43964.9	1	38758.3	1	32453.5	1	26985.3	1
		21644.8	1	35068.1	1	20456.5	1	18827.4	1	16492.6	4	36885.1	1	25901	1	10893.7	6	44412.2	1	36797.1	1	32499.5	1	34458.1	1	40308.8	1	34219.4	1	32515.8	1	36870.3	1	31024.2	1	26390.3	1	33079.2	1	44470.4	1	39026.4	1	32772.5	1	27028.8	1
		21878.2	1	35301.6	1	20674	1	18927.1	1	16696.5	4	37275.4	1	26387	1	10935.7	6	44785.7	1	37172.2	1	32555.2	1	34947.6	1	41010.7	1	34371.2	1	32909.6	1	37589.2	1	31320.7	1	26411.2	1	33186.8	1	44765	1	39178.2	1	33210.2	1	27519.7	1
		22106	1	35323	1	20709.8	1	19013	1	16951.4	4	37682.5	1	26822	1	11012.7	6	44999.7	1	37434.6	1	33032.7	1	35402.4	1	41567.5	1	34784.9	1	33417.9	1	38483.6	1	31431.6	1	26746.7	1	33464.4	1	45734.1	1	39660.6	1	33413.9	1	27553	1
		22289.7	1	35462	1	20906.5	1	19178.1	1	17019.9	3	38081.1	1	27185.2	1	11119.6	5	45732.7	1	37645.2	1	33044.4	1	35876.3	1	41795.8	1	35215.2	1	34074.6	1	39072	1	31552.3	1	26905.7	1	33760.3	1	45898.9	1	40895.4	1	33719.3	1	27888.9	1
		22474.6	1	35913.4	1	21047.5	1	19236.7	1	17184.9	3	38420.7	1	27591.5	1	11188.1	5	46191.2	1	37915.8	1	33483.3	1	36495.3	1	42189.7	1	35377.1	1	34770.4	1	39914.8	1	31945.4	1	27104.7	1	34070.4	1	47255.8	1	41924	1	34302.2	1	28148.6	1
		22718.8	1	36248.3	1	21123.6	1	19271.4	1	17428.6	3	39022.4	1	28040.3	1	11196.1	5	46215.7	1	38258.3	1	33537.6	1	36810	1	43039.2	1	35602.4	1	35241	1	40975.4	1	31973.5	1	27327.4	1	34379.6	1	48300.2	1	42945.5	1	34478.2	1	28376.1	1
		22755.2	1	36926.7	1	21417.3	1	19366.5	1	17527.4	2	39603.2	1	28458	1	11252.3	5	46740.5	1	38313.1	1	33838.2	1	36982.2	1	43202	1	35941	1	35827.9	1	42038.8	1	32301.1	1	27568	1	34583.3	1	49436.9	1	44079.8	1	35301.6	1	28832.6	1
		22830.1	1	37167.2	1	21529.9	1	19396.4	1	17591.1	2	40171.7	1	28811.6	1	11339.7	5	47100	1	38652.1	1	34028.8	1	37130.1	1	43608.8	1	35996.7	1	36369.9	1	43342.3	1	32399.9	1	27783.4	1	34749.6	1	50555.8	1	44936.5	1	35657	1	29076.4	1
		23115.3	1	37495.2	1	21684.9	1	19416.9	1	17791.9	2	40488.9	1	29166.6	1	11425.2	5	47471.8	1	38664.4	1	34454.8	1	37288.7	1	43863.7	1	36286.1	1	37160.2	1	44623	1	32627.4	1	27832.6	1	35195.2	1			45864.3	1	36114.9	1	29566.2	1
		23184.3	1	37814.8	1	21928.6	1	19501.4	1	17985.2	2	40884.9	1	29631.8	1	11461.1	5	47534.6	1	38926.8	1	34455.1	1	37577	1	44113.5	1	36557.7	1	37807.7	1	45543.5	1	32762.6	1	28223.5	1	35205.6	1			46897.8	1	36544.1	1	29587.5	1
		23269.9	1	38118	1	21929.9	1	19751.4	1	18088.5	2	41375	1	29925.8	1	11528.7	5	48098.4	1	39180.6	1	34771.2	1	37870.9	1	44622	1	37026.2	1	38554.7	1	46775.6	1	33047.1	1	28456.9	1	35578.1	1			47973	1	37061.8	1	30238.7	1
		23439.9	1	38263.3	1	22023	1	19767.6	1	18173.2	2	41777.8	1	30239.5	1	11572.8	5	48588.9	1	39273.2	1	34987	1	38357.9	1	44650.9	1	37118.7	1	39283.8	1	47481.7	1	33049.5	1	28647.7	1	35879.3	1			48992.8	1	37346.8	1	30269.7	1
		23547.2	1	38307.3	1	22099.2	1	19771.8	1	18232	2	42214.1	1	30457.9	1	11680.8	5	48606.3	1	39666.3	1	35319.1	1	38697.4	1	45629.1	1	37659.6	1	39895.7	1	48601.2	1	33437.7	1	28903.8	1	36086	1			49714.8	1	37744.4	1	30836.9	1
		23613.9	1	38497.4	1	22156.9	1	19879.5	1	18251.8	2	42658.2	1	30697.8	1	11699.9	5	49227.7	1	39928.4	1	35489.4	1	39061.6	1	45799.2	1	37735.5	1	40542	1	49747.5	1	33463.2	1	28955.3	1	36378.1	1			50654.1	1	38197.1	1	30984.8	1
		23802.2	1	38872.7	1	22196.2	1	19963.1	1	18426.4	2	43098.4	1	30833	1	11773.5	5	49696.3	1	40061.7	1	35873.2	1	39442.1	1	46779.1	1	38134.5	1	41411.2	1	50560.6	1	33787.5	1	29546.3	1	36499.2	1			51385	1	38283.3	1	31300.2	1
		23826	1	39129.6	1	22241.9	1	20050.2	1	18625.8	2	43578.8	1	31018.1	1	11924.3	5	49967.3	1	40427	1	36285.9	1	39747.3	1	46801.4	1	38403	1	42152.2	1	50886.9	1	33874.9	1	29743.1	1	36822.3	1			52145.2	1	38591.7	1	31544.4	1
		23874.3	1	39486.9	1	22339.1	1	20328.6	1	18785.1	2	44098.1	1	31122.9	1	11946.4	5	50234.8	1	40552.9	1	36715.2	1	40421.4	1	47558.6	1	38566.7	1	43205.6	1	51004.8	1	34272	1	30033.4	1	37045.9	1			53001.2	1	39015.2	1	31705	1
		24022.1	1	40098.6	1	22399.2	1	20457.7	1	18847.6	2	44435.5	1	31481.7	1	12031.5	5	50780.6	1	40886	1	37065.1	1	40856.5	1	47789.2	1	39143.8	1	44170.2	1	51106.1	1	34396.3	1	30126.4	1	37547.1	1			53645.4	1	39117.1	1	32058	1
		24190.2	1	40874.4	1	22410	1	20458.2	1	18923.6	2	44693.4	1	32019.2	1	12071.7	5	51766.4	1	41133.1	1	37422.4	1	41343.5	1	49016.4	1	39180.2	1	45117.3	1	51229.9	1	34633.3	1	30637.2	1	37579	1			54568.5	1	39576.7	1	32177	1
		24227.6	1	41227.8	1	22469.3	1	20710.4	1	19070.4	2	44841.6	1	32438.2	1	12095.6	5	52374.8	1	41349	1	38114.1	1	41807.6	1	49306.2	1	39603.3	1	45592.2	1	51315.8	1	34705.3	1	30725.2	1	38157.5	1			55073	1	39585.5	1	32690.1	1
		24521.2	1	41935	1	22470.8	1	21010	1	19216.9	2	45316.4	1	32713.9	1	12190.3	5	53420.7	1	41644.8	1	38847.5	1	42299.6	1	50029.1	1	40070.5	1	45793.4	1	51389.5	1	34982.3	1	30917.4	1	38305.2	1			55862.7	1	39945.3	1	32756.8	1
		24608.4	1	42455.1	1	22487.2	1	21079.9	1	19357.3	2	45860.9	1	32859.2	1	12237.3	5			41740.2	1	39626.8	1	42757.7	1	50772.8	1	40122.1	1	46110.4	1	51818.7	1	35112.7	1	31210.1	1	38823.8	1			56844.8	1	40197.4	1	33278.4	1
		24790.9	1	42953.7	1	22491.2	1	21123.1	1	19421.4	2	46111.6	1	33043	1	12266.4	5			42145.8	1	40426.2	1	43126.9	1	51442.3	1	40571.2	1	46420	1	52384	1	35396.5	1	31510.4	1	38846.8	1					40511.9	1	33313.7	1
		24901.3	1	43698.7	1	22607.3	1	21337.5	1	19607.2	2	46306.8	1	33176.4	1	12273.9	5			42252	1	41012.7	1	43644.8	1	52328.6	1	40852.1	1	47024.3	1	52840.2	1	35600.5	1	31790.7	1	39154.9	1					40680	1	33838.1	1
		25123.9	1	44161.4	1	22631.2	1	21339.9	1	19781.2	2	46558.8	1	33396.4	1	12281.2	5			42503.6	1	41450.8	1	44091.7	1	53304.6	1	41016.1	1	47580.3	1	52964.5	1	36014.5	1	32213.3	1	39354.1	1					41004.8	1	33908.8	1
		25330.1	1	44790.8	1	22645.9	1	21360.5	1	19923.2	2	46904	1	33609.3	1	12317.7	5			42785.6	1	42052.5	1	44572.4	1	53741.3	1	41439.2	1	47989.5	1	53211.6	1	36032.3	1	32309.7	1	39482.9	1					41157.5	1	34094.5	1
		25340.6	1	45045.8	1	22684.6	1	21473.8	1	19994	2			33930.6	1	12381.5	5			43019.6	1	42612.8	1	44942.1	1	54291	1	41542.5	1	48858.6	1	53635.9	1	36330	1	32709.9	1	39996.5	1					41202.5	1	34353.3	1
		25495	1	45367.3	1	22747.9	1	21544.9	1	20076.1	2			34211.1	1	12403.9	5			43219.6	1	43207.8	1			55426.5	1	41998.6	1	49508.1	1	53815.5	1	36444	1	32787.9	1	40426.2	1					41725.4	1	34387.3	1
		25589.5	1	45529	1	22789.8	1	21573.5	1	20236.5	2			34609.2	1	12415	5			43470.1	1	43705.7	1			56625.4	1	42041.5	1	50062.1	1	54018.5	1	36653.8	1	33109.6	1	40497.6	1					41765.2	1	34544.1	1
		25703.7	1	45667.6	1	22810.9	1	21588	1	20399.9	2			34750.2	1	12500.8	5			43615.5	1	44094	1			57788.7	1	42470.5	1	50470.2	1	54091.3	1	36888.8	1	33422.7	1	40829.4	1					42309.1	1	34761	1
		25704.1	1	45709.6	1	22811.4	1	21590.3	1	20585.8	2			35012.4	1	12553.2	5			43834.8	1	44578.9	1			59200.5	1	42735.8	1	51023.2	1	54170	1	37020.1	1	33512	1	41056.7	1					42334.3	1	34849.1	1
		25955.1	1	45765.2	1	22854.1	1	21639.6	1	20660.9	2			35310.7	1	12617.1	5			43991.6	1	45123.1	1			61083.7	1	42921.1	1	51776	1	54313.5	1	37338	1	33878.8	1	41266.3	1					42849.2	1	35143.3	1
		26045.1	1	45911.3	1	22863.8	1	21744.5	1	20891.6	2			35519.5	1	12659.3	5			44385	1	45731	1			62632.9	1	43252.6	1	52461.5	1	54329.8	1	37346.5	1	33953.3	1	41610.5	1					42970.4	1	35481.2	1
		26233.5	1	46236.5	1	22866.6	1	21752.9	1	21076.5	1			35877.1	1	12721.1	5			44435.7	1	46364.6	1					43612.5	1	52884.5	1	54378.9	1	37610.5	1	34389.4	1	41626.4	1					43457.5	1	35517.4	1
		26347.6	1	46460.7	1	22881.4	1	21822.9	1	21098.7	1			36166.6	1	12791.1	5			44800.4	1	47060.1	1					43770.7	1	53635.4	1	54400.3	1	37726.7	1	34500.6	1	42078	1					43561.1	1	35948	1
		26476	1	46732.7	1	22882	1	21831.3	1	21270	1			36237	1	12938.9	5			44998.9	1	47718.6	1					44135.2	1	54238.4	1	54580.3	1	37727.7	1	34998.4	1	42282.8	1					43961.6	1	35998.8	1
		26873.8	1	47016.1	1	22940.8	1	21850.1	1	21413.8	1			36319.1	1	13079	5			45242.8	1	48242.2	1					44212	1	54959.6	1	54943.4	1	38117.8	1	35229.6	1	42503.8	1					44072.1	1	36350.2	1
		26888.7	1	47133.7	1	22940.9	1	21863.6	1	21562.4	1			36482.7	1	13206.5	5			45376.7	1	48647.8	1					44408.7	1	55452.7	1	55353.6	1	38129.1	1	35496.1	1	42948.3	1					44121	1	36414.8	1
		27223	1	47277.6	1	22991	1	21902.4	1	21622	1			36815.4	1	13247.3	5			45660.6	1	49093.2	1					44518.2	1	56086.2	1	55588	1	38295.6	1	35730.6	1	42968.7	1					44259.7	1	36809.9	1
		27264.1	1	47540.1	1	22991.1	1	21908.9	1	21875.8	1			36989.3	1	13429.1	5			45836.8	1	49479.3	1					45047.3	1	56788.9	1	56014.1	1	38352.3	1	36054.2	1	43298.2	1					44565.9	1	36821.6	1
		27512.6	1	48005.5	1	22994	1	21933.6	1	22053.2	1			37090.1	1	13505.6	5			46088	1	49951.8	1					45049.5	1	57487.9	1	56344.2	1	38509.6	1	36102.6	1	43597.7	1					44651	1	36984.6	1
		27543.2	1	48025.6	1	23030.2	1	21998.6	1	22207.1	1			37234.1	1	13619.7	5			46374.5	1	50268.6	1					45535.6	1	58248.9	1	56809.7	1	38593.2	1	36495.7	1	43730.7	1					44921.3	1	37220.3	1
		27803.7	1	48072.4	1	23087.4	1	22080.7	1	22285.2	1			37399.6	1	13765.9	5			46511.7	1	50828.7	1					45776.5	1	58939.2	1	57366.1	1	38926.7	1	37078.7	1	44225.4	1					45245.5	1	37343.4	1
		27980.2	1	48164.7	1	23096.9	1	22138	1	22565.3	1			37662.5	1	13896.2	5			46882.6	1	51539	1					45952.1	1	59644.6	1	57813.7	1	39028.7	1	37184.3	1	44333	1					45369.1	1	37635.7	1
		28301.8	1	48229.6	1	23164.1	1	22147.8	1	22842.1	1			38073.6	1	13945.2	5			47108.8	1	52186.5	1					46395.1	1	60075.6	1	58239	1	39381.8	1	38019.2	1	44643	1					45537.2	1	37728.2	1
		28380	1	48434.6	1	23171.9	1	22169.5	1	22867.1	1			38482.1	1	14034.1	5			47338.8	1	52742.5	1					46508.8	1	60667.4	1	58906.2	1	39474.8	1	38056.4	1	44992.6	1					45880.3	1	37942.4	1
		28817	1	48613.4	1	23233.6	1	22176.2	1	23031.4	1			39065.4	1	14214.5	5			47517.8	1	53271.9	1					46825.3	1	61201.5	1	59333.7	1	39686.9	1	38242.1	1	45138.9	1					45914.5	1	38190.7	1
		28893.8	1	48699.9	1	23278.1	1	22196	1	23212.2	1			39282	1	14386.8	5			47988.1	1	53814.8	1					46903	1	61837.7	1	59632.4	1	39864	1	38517.7	1	45667.6	1					46072.4	1	38318.9	1
		29364	1	48742	1	23384.5	1	22210.1	1	23451.3	1			39334.1	1	14586.2	4			47992.9	1	54503.5	1					47249.9	1	62602.4	1	59926.6	1	40018	1	38885	1	45674.1	1					46080	1	38570.7	1
		29460.5	1	48912.1	1	23426.6	1	22212.6	1	23630.6	1			39404.5	1	14629.7	4			48455.2	1	55134.5	1					47754.6	1	63347.2	1	60295.8	1	40195.2	1	39138.4	1	46131.9	1					46161.1	1	38803.5	1
		29711.5	1	49441.2	1	23757.7	1	22271.9	1	23646.7	1			39408.7	1	14673.6	3			48502.2	1	55694.9	1					48242.6	1	64166	1	60664.7	1	40351.3	1	39830.4	1	46315.4	1					46287.6	1	38844.5	1
		30125.8	1	49774.1	1	23994.5	1	22306.6	1	23846.1	1			39415	1	14699.4	2			48835.6	1	56076.9	1					48495.6	1	64939.4	1	61232.3	1	40632.9	1	39853.5	1	46453.3	1					46416.2	1	38956.3	1
		30223	1	50158.4	1	24034.4	1	22319	1	24050.4	1			39438.2	1	14777.9	2			48926.5	1	56805.5	1					48666.9	1	65263.4	1	61809.9	1	40876.2	1	40223.8	1	46849.9	1					46577.8	1	39105.8	1
		30524.4	1	50596.4	1	24226.2	1	22327.4	1	24137.2	1			39490.8	1	14851.8	2			49538.2	1	57530.8	1					49187.8	1	65709.1	1	62351.4	1	41209.3	1	40471	1	46904.1	1					46876.6	1	39318.8	1
		30629.4	1	50872.4	1	24344	1	22412.7	1	24270.8	1			39506.6	1	14966.4	2			49643.8	1	58123.4	1					49585.3	1	66491.1	1	62873.6	1	41521.9	1	41178.4	1	47580.7	1					47141.7	1	39367.1	1
		31176.5	1	51242.2	1	24354	1	22419.6	1	24419	1			39559.4	1	14996	2			50159.9	1	58401.6	1					49673.8	1	67139.8	1	63280.7	1	41771.5	1	41573.3	1	47690.1	1					47304.7	1	39673.5	1
		31203.2	1	51549.6	1	24724.1	1	22444	1	24511.9	1			39601.3	1	15152.2	2			50229.4	1	58637.9	1					50132.7	1	67794.8	1	63585.3	1	42224.4	1	41885	1	48088	1					47490.4	1	39872.3	1
		31619	1	51808.7	1	24795.1	1	22456.2	1	24612.8	1			39622.8	1	15186.1	2			50671.9	1	58862	1					50497.2	1	68197.9	1	64071.8	1	42312.4	1	42048.2	1	48434.3	1					47864.1	1	39945.4	1
		31784.1	1	52213.1	1	25004.5	1	22458.9	1	24686.7	1			39657.2	1	15309.5	2			50775	1	59283.8	1					50608.1	1	68464.4	1	64407.4	1	42621.9	1	42475.5	1	48734.3	1					47949.8	1	40312.3	1
		31893.5	1	52592.8	1	25137.1	1	22459.5	1	24767.6	1			39696	1	15355.7	2			51072.9	1	59857.5	1					50989.5	1	68902.5	1	64743.6	1	42703.9	1	42593.9	1	48975.8	1					48553	1	40903.9	1
		32248	1			25173.1	1	22525.4	1	24783.7	1			39863.9	1	15450	2			51429.9	1	60439.6	1					51239.2	1	69379.2	1	64942.9	1	42887.6	1	43063.6	1	49170.1	1					48690.4	1	41373.4	1
		32271	1			25448.1	1	22535.2	1	24806.4	1			40062.9	1	15626.5	2			51466.4	1	60854.7	1					51387.5	1	69888	1	65274.6	1	43133.7	1	43554.5	1	49520.4	1					49154.2	1	41665.3	1
		32555.4	1			25624.5	1	22541.6	1	24842.5	1			40316.4	1	15647.2	2			51999.7	1	61287.1	1					51585.5	1	70639.2	1	65620.7	1	43935.5	1	43878.9	1	49612.1	1					49410.3	1	42190.3	1
		32803.8	1			25739.6	1	22554	1	24932.1	1			40713.7	1	15794.2	2			52053.9	1	61708.2	1					51936.9	1	71122.8	1	65971.2	1	44055	1	44568.6	1	49839.8	1					49685.2	1	42805.3	1
		32849.2	1			25770.2	1	22662	1	24977.9	1			41107.8	1	15806.6	2			52530.4	1	62465.7	1					52247.4	1	71371.3	1	66237.5	1	44454	1	44870.5	1	50348	1					50073.1	1	43333.7	1
		33048.6	1			25963.2	1	22665	1	25058.2	1			41468.4	1	15967	2			52595.6	1	62793	1					52420.1	1	71744.3	1	66532.8	1	44861.4	1	45397.3	1	50442.5	1					50191.7	1	43762.7	1
		33362.8	1			26210.1	1	22694	1	25131.7	1			41525.1	1	15981.7	2			53038.6	1	63228	1					52629.2	1	72013.3	1	66758	1	45302.9	1	45874.9	1	50826.4	1					50958.9	1	44041.6	1
		33464.4	1			26236.3	1	22715.7	1	25299.3	1					16142.5	2			53040.4	1	63711.9	1					52950.5	1	72546.1	1	66975.1	1	45464.6	1	46646.6	1	51214.2	1					50996.6	1	44746.3	1
		33803.2	1			26625.9	1	22763.9	1	25468.8	1					16153.2	2			53491	1	64163	1					53179.8	1	73089.9	1	67256.5	1	46061.8	1	46756.5	1	51446	1					51684.8	1	45542.8	1
		34165.9	1			26681.5	1	22901	1	25529	1					16326.1	2			53576	1	64657.8	1					53347	1	73403.4	1	67592.9	1	46479.2	1	47668.5	1	51667.3	1					51904.9	1	45978.7	1
		34199.1	1			27013.6	1	22925.4	1	25741.6	1					16346.7	2			53851.4	1	65057.7	1					53827.8	1	73907	1	67938.6	1	46559.1	1	47722.8	1	52121	1					52142.3	1	46346.5	1
		34532.4	1			27081.6	1	22950.2	1	25922	1					16523.5	2			54158.5	1	65519.4	1					53915	1	74388.6	1	68214.5	1	47102.7	1	48089.1	1	52559.4	1					52506.5	1	47083	1
		34561.5	1			27304.5	1	22984.5	1	26094.2	1					16568.7	2			54245.9	1	66058.7	1					54149.6	1	74847.8	1	68526.3	1	47186.5	1	48210.7	1	52588.6	1					52751.5	1	47838.8	1
		34947.2	1			27377.6	1	23018.9	1	26119.7	1					16694.9	2			54766.9	1	66605	1					54240.4	1	75333.9	1	68799.7	1	47578.8	1	48791	1	52989.6	1					53234.3	1	48595.2	1
		35114.8	1			27628.7	1	23032.6	1	26328.7	1					16805	2			54781.2	1	67086.2	1					54552.1	1	75877.3	1	69141	1	47776	1	49193.8	1	53517.5	1					53283.1	1	49222	1
		35535.6	1			27708	1	23048.4	1	26521.3	1					16818.2	2			55300.2	1	67420	1					54570.2	1	76417.2	1			48092.1	1	50018.8	1	53940.9	1					53780.5	1	49917.6	1
		35609.4	1			27925	1	23086.4	1	26674.5	1					16996.1	2			55419.6	1	67974.3	1					54701	1	76977.9	1			48469.5	1	50095.6	1	54107.5	1					53878.9	1	50501.5	1
		35761.3	1			28221.1	1	23094.6	1	26886.5	1					17012.9	2			55692.3	1	68360.1	1					54715.8	1	77715.2	1			48545.8	1	50958.3	1	54403	1					54266.6	1	51235.5	1
		35880.1	1			28303.8	1	23101.3	1	26962	1					17156.6	2			56005.4	1	68771.6	1					55123	1	77994.1	1			48845.9	1	51231.5	1	54797.4	1					54411.4	1	51746.3	1
		36094.8	1			28512.4	1	23105	1	27113.2	1					17222	2			56209.8	1	69188.6	1					55379.7	1	78203.5	1			49258.5	1	51758.1	1	55091.6	1					54541.5	1	52440.8	1
		36107.3	1			28561.5	1	23141.1	1	27417.3	1					17319.6	2			56641.6	1	69459.5	1					55410.4	1	78617	1			49298.5	1	51867.1	1	55260.7	1					54605.8	1	52925.1	1
		36475.1	1			28817.3	1	23143	1	27587.1	1					17399.2	2			56649.1	1	69832.7	1					55793	1	78864.8	1			49588.1	1	52393.7	1	55987.6	1					54825.7	1	53368.6	1
		36511.6	1			29082.2	1	23229	1	27606.2	1					17471.3	2			57023	1	70437.9	1					55939.8	1	79645.4	1			49846.3	1	52631.8	1	57021.8	1					54849.2	1	54484.3	1
		36761.5	1			29148.8	1	23232.4	1	27721.2	1					17555.5	2			57286	1	70876.4	1					56412.5	1	80745.9	1			50022.8	1	53085.8	1	57730.1	1					54858	1	55035.6	1
		36961.5	1			29409.4	1	23232.7	1	27901.4	1					17582.6	2			57400.8	1	71378	1					56458.1	1	81402	1			50373.3	1	53367.2	1	58228.1	1					54862	1
		37183.1	1			29494.2	1	23249.9	1	28110.9	1					17684.6	2			57950.8	1	71953.1	1					56829	1	82010.2	1			50618.9	1	53716.2	1	58798.7	1					54920.8	1
		37722.1	1			29661.4	1	23325	1	28251.3	1					17720.4	2			58033.9	1	72682.3	1					57301.4	1	82700.3	1			51046	1	53981.8	1	59436.8	1					54943.8	1
		37726.4	1			29712.9	1	23352.8	1	28326	1					17746.2	2			58423.7	1	73501.4	1					57696.9	1	83477.4	1			51083.1	1	54374.5	1	59933.2	1					54976	1
		37984	1			29869.8	1	23396.8	1	28543.1	1					17775.6	2			58581.4	1	74336.4	1					58106.8	1	84174.1	1			51319.5	1	54960.3	1	60567.6	1					55068.4	1
		38231.8	1			29901.7	1	23425.6	1	28760.3	1					17787.7	2			58901.9	1	75181.2	1					58513	1	84842.6	1			51655.8	1	54998.5	1	61345.1	1					55301	1
		38555.1	1			30277.5	1	23434.8	1	28915.2	1					17832.2	2			59367	1	75696.9	1					58864.5	1	85539.7	1			51799.2	1	55407.5	1	61987.4	1					55494.3	1
		38775	1			30352.6	1	23436	1	28978.3	1					17875.8	2			59751	1	76374.7	1					59338.8	1	85784.9	1			51939	1	55773	1	62202.3	1					55629.2	1
		39013.9	1			30735.5	1	23474.2	1	29422.4	1					17951.7	2			59912.1	1	77048.4	1					59790.4	1	86141.1	1			52308	1	56053.4	1	62303.9	1					55941.7	1
		39210.6	1			30897	1	23484.3	1	29467.4	1					18101	2			60308.8	1	77658.9	1					60246.6	1	86241.2	1			52628.4	1	56516.3	1	63065.9	1					56049.1	1
		39437.3	1			31177.6	1	23535.3	1	30029.4	1					18246.3	2			60481.6	1	78172.4	1					60758.2	1	86488	1			52680.5	1	56582.3	1	63895.4	1					56217	1
		39643.2	1			31211.7	1	23572.1	1	30106.5	1					18321.7	2			60818.3	1	78749.4	1					61295.8	1	86651.6	1			53058.6	1	57189.8	1	64150.5	1					56530.6	1
		39794.1	1			31389.1	1	23621.9	1	30337.9	1					18434.7	2			60945.8	1	79410.2	1					61941.6	1	86789.9	1			53215.5	1	57661.9	1	64715.3	1					56679.4	1
		40179.9	1			31486.6	1	23660.6	1	30490	1					18561	2			61422.3	1	79821.3	1					62469.3	1	87162.8	1			53286.4	1	57821.1	1	65366.8	1					56779.2	1
		40189.2	1			31700.2	1	23726.3	1	30633.5	1					18706.8	2			61529.5	1	80356.7	1					63055.3	1	87283.3	1			53559.3	1	58419.6	1	65816.6	1					56832.3	1
		40656.6	1			31709.5	1	23731.1	1	30654.2	1					18798.2	2			61832.4	1	80769.8	1					63676.2	1	87404	1			53601.5	1	58943.4	1	66536.4	1					57211	1
		40690.8	1			31943.2	1	23737.1	1	30778.1	1					18927	2			62101.6	1	81363.5	1					64286.3	1	87703.5	1			53869.7	1	59895	1	67201.1	1					57211.2	1
		41283.2	1			32194.3	1	23769.8	1	30931.4	1					19094	2			62108.1	1	81823.3	1					64877.5	1	87860.1	1			53919.9	1	60699.9	1	67991.9	1					57598.4	1
		41646.4	1			32220.9	1	23795.9	1	31126.6	1					19215	2			62611.3	1	82250.9	1					65251.2	1	88129.3	1			54250	1	61455.6	1	68549.7	1					57833.3	1
		41698.5	1			32373	1	23811.5	1	31185.6	1					19345.4	2			62767.4	1	82802.9	1					65707.5	1	88151.2	1			54463.1	1	62052.2	1	69338	1					57933.5	1
		41944.2	1			32588.9	1	23836.4	1	31270.7	1					19514.6	2			63242.5	1	83303.1	1					66193.2	1	88534.3	1			54548	1	62846	1	69917	1					58309.6	1
		42000.3	1			32684.5	1	23918.4	1	31449.3	1					19652.4	2			63505.8	1	83598	1					66548.9	1	88546.7	1			54852.7	1	63538.4	1	70494.8	1					58427.7	1
		42201.1	1			32959.6	1	23919.7	1	31629.9	1					19760.2	2			63717.7	1	83669.5	1					66902.7	1	88801	1			55067	1	64294.3	1	71129.8	1					58589	1
		42393.4	1			33118.4	1	23987.6	1	31750.1	1					19933.9	2			64215.1	1	84151.4	1					67349	1	88862.8	1			55136.5	1	65149.9	1	72006	1					59010.8	1
		42477.3	1			33280.8	1	24016.2	1	31797.2	1					20147.6	2			64312.1	1	84426.8	1					67977.3	1	88912.3	1			55427.2	1	66082.7	1	72754.4	1					59180.2	1
		42721.1	1			33449.7	1	24027.9	1	31926.3	1					20296.8	2			64592.4	1	84979.2	1					68565.3	1	89083.6	1			55484.7	1	66812.4	1	73251.3	1					59590.9	1
		42858.2	1			33643.5	1	24039.2	1	32078	1					20467.7	2			64996.6	1	85250	1					69095.1	1	89151.3	1			55769.5	1	67534.6	1	74008.7	1					59710.9	1
		42971.7	1			33731.9	1	24162.1	1	32232.7	1					20639.3	2			65135.8	1	85371	1					69662.7	1	89245.1	1			55841.9	1	68221.5	1	74621.3	1					60305.1	1
		43256	1			33751.6	1	24238.1	1	32298.7	1					20806.7	2			65621.1	1	85722.6	1					70082.6	1	89356.9	1			56054.5	1	69364.7	1	75036	1					60334.5	1
		43430.3	1			33943.1	1	24357.6	1	32510.4	1					21036.7	2			65659.8	1	86019.7	1					70432.8	1	89508.4	1			56346.4	1	70329.4	1	75438.9	1					60618	1
		43933.4	1			34032.3	1	24394.6	1	32771.5	1					21360.2	2			66290.9	1	86262.7	1					71200.2	1	89606.4	1			56358.2	1	71929.1	1	75851.3	1					60781.6	1
		43945.2	1			34061.2	1	24413.9	1	32977.8	1					21581.8	2			66520	1	86494.8	1					71596.6	1	89617.9	1			56734.5	1	72981.9	1	76583.4	1					61136.9	1
		44204.8	1			34066	1	24499.1	1	33460	1					21800.6	2			66935.8	1	86708.9	1					71932.2	1	89649.8	1			56827.2	1	74380.7	1	77185.7	1					61329.1	1
		44298.3	1			34105	1	24529.6	1	33490.2	1					21940.3	2			67191.4	1	87130.4	1					72178	1	89686.7	1			57101.9	1	75765.3	1	77987.3	1					61329.3	1
		44566.1	1			34161.8	1	24623.3	1	33921.6	1					22017.6	2			67363.5	1	87512.8	1					72538.2	1	89726.1	1			57281.8	1	77256.9	1	78443.1	1					61867.5	1
		44612.6	1			34241	1	24653.2	1	33999	1					22138.7	2			67887.6	1	87886.6	1					72757.9	1	89757	1			57695.1	1	78989.2	1	79168.7	1					61999.8	1
		44886	1			34314.7	1	24666.2	1	34400.7	1					22232.3	1			67965.2	1	88356.3	1					73469.7	1	89777.3	1			57698.7	1	79978.8	1	79796.5	1					62444.9	1
		45232.4	1			34398.9	1	24768	1	34606.3	1					22307.2	1			68545.8	1	88857.2	1					74121.4	1	89807.6	1			58006.8	1	80697.3	1	80236.8	1					62494.5	1
		45306	1			34430	1	24801	1	34709.6	1					22386.1	1			68546	1	89453.6	1					74684.4	1	89847.1	1			58229.1	1	82443.7	1	81002.6	1					62756.1	1
		45490.2	1			34529.2	1	24868.7	1	34995.3	1					22533.3	1			69368.1	1	90084.6	1					75257.2	1	89936.9	1			58337.9	1	84491.5	1	81692.4	1					63141.9	1
		45520.9	1			34722.7	1	24873	1	35180.1	1					22618	1			69384.8	1	90659.5	1					75843	1	90441.4	1			58688.2	1	84912.7	1	82171.2	1					63269.6	1
		45943.8	1			34813.9	1	24886.4	1	35460.2	1					22754.4	1			69924.8	1	91229.2	1					76034.3	1	90847.8	1			58740.9	1	85374.1	1	82728.1	1					63606.6	1
		46306.5	1			34828.2	1	24892.6	1	35787.2	1					22947.4	1			70549.4	1	91962.5	1					76956.2	1	91297.4	1			59166.1	1	86294.2	1	83235.1	1					64083.7	1
		46642.4	1			34974.1	1	24948.8	1	35842.4	1					23152.6	1			70631.5	1	92535.7	1							91804.9	1			59352.8	1	86901.7	1	83736.3	1					64085.1	1
		46920.9	1			34979.3	1	24954.5	1	36236.1	1					23294.5	1			71147.1	1	93048.5	1							92222.2	1			59819.6	1	87206.1	1	84199	1					64552.6	1
		47125	1			35050.1	1	25014.2	1	36363.8	1					23476.2	1			71393.6	1	93616.7	1							92642.1	1			59886	1	87838.9	1	84944.6	1					64660.6	1
		47380.9	1			35174.5	1	25041.6	1	36555.6	1					23625.3	1			71791.2	1	94090.3	1							93098.3	1			60266	1	88737.6	1	85691.7	1					65057.8	1
		47648.1	1			35212.3	1	25105.7	1	36777.5	1					23692.2	1			72252.5	1	94678	1							93630.7	1			60384.5	1	89121.1	1	86606.2	1					65237.9	1
		47766.4	1			35249.4	1	25123.3	1	36991.7	1					23887.1	1			72317	1	95040.7	1							94135.7	1			60668	1	89593.2	1	87224.9	1					65606.1	1
		48149.8	1			35316.8	1	25225.8	1	37279.1	1					24143	1			72785.2	1	95495.6	1							94581.1	1			60914.2	1	90078.6	1	87687.4	1					66099.8	1
		48724.8	1			35410.1	1	25300.7	1	37289.9	1					24394.6	1			73262.3	1	95928.5	1							95049.9	1			61103.2	1	91031.5	1	88206.5	1					66116.6	1
		49127	1			35513	1	25313.9	1	37614.7	1					24571.3	1			73284.6	1	96399.6	1							95509.2	1			61469.6	1	91808	1	88704.2	1					66600.6	1
		49376.6	1			35547.8	1	25462.7	1	37913.9	1					24678.9	1			73712.9	1	96865.8	1							95964.2	1			61661.7	1	92629.3	1	89414.5	1					66700	1
		49774.7	1			35702.5	1	25507.8	1	37918.8	1					24753.4	1			74204.9	1	97249.9	1							96290.5	1			61905.6	1	93875.7	1	90005.7	1					67079.7	1
		50159.9	1			35753.3	1	25515.5	1	38371.7	1					24851.3	1			74673.2	1	97857.8	1							96680.2	1			62062.2	1	95262.3	1	90497.7	1					67434.5	1
		50579.7	1			35757.1	1	25640.1	1	38397.4	1					24962.6	1			74840.9	1	98365.1	1							97088.2	1			62377	1	96938.7	1	91405.5	1					67476.1	1
		51124.2	1			35803.4	1	25750.8	1	38804.7	1					25040.2	1			75025.3	1	98872.5	1							97549.6	1			62505.3	1	98064.9	1							67901.5	1
		51843.5	1			35832.5	1	25809.2	1	38819.7	1					25126	1			75405.8	1	99441.7	1							97869.3	1			62796.7	1	99094.6	1							67952.4	1
		52130.6	1			35981.6	1	25855.6	1	39234.1	1					25212.8	1			76362.4	1	99775.8	1							98249.8	1			62849.8	1									68387.3	1
		52479	1			36021.3	1	25930	1	39445.6	1					25272.2	1			77143.6	1	100227	1							98275.8	1			63112.8	1									68575.1	1
		52806.2	1			36066.7	1	26017.1	1	39855.7	1					25282	1			77969.6	1	100748	1							98550	1			63265.6	1									69116.3	1
		53097.8	1			36351.2	1	26061.8	1	40057	1					25289.1	1			78877.7	1	101249	1							99143.1	1			63300.5	1									69588.5	1
		53374.1	1			36391	1	26191.2	1	40347.6	1					25300.1	1			79384.7	1									99614.1	1			63538.4	1									69803.7	1
		53677.5	1			36691.8	1	26200.2	1	40692.6	1					25306.9	1													100837	1			63736.3	1									70045.8	1
		54168.5	1			36727.2	1	26412.6	1	40729.8	1					25307.8	1													101098	1			63830.6	1									70354.2	1
		54241	1			36975	1	26413.6	1	41140.9	1					25370.6	1													101249	1			64118	1
		54440.8	1			37094.2	1	26423.4	1	41327.3	1					25421	1													101519	1			64208.1	1
		54828	1			37205.7	1	26566.5	1	41519.7	1					25544.4	1													101919	1			64229.7	1
		55126.2	1			37423.9	1	26640.2	1	41974.4	1					25688.6	1													102026	1			64238.1	1
		55428.5	1			37916	1	26660.9	1	42090.4	1					25871.9	1													102139	1			64320.8	1
		56018.3	1			37988.8	1	26662.4	1	42639.3	1					26030.3	1													102281	1			64442.5	1
		56631.8	1			38425.6	1	26671.6	1	42703.1	1					26108.8	1													102749	1			64604.1	1
		57340.9	1			38489.9	1	26719.9	1	43225.3	1					26330.2	1																	64686.6	1
		57846.9	1			38841.2	1	26724.5	1	43638.6	1					26547.8	1																	65034.6	1
		58284.6	1			38841.2	1	26876.5	1	43772.8	1					26768.2	1																	65117.4	1
		58678.5	1			39191.7	1	26910.1	1	44310	1					26948.6	1																	65384.3	1
		59061.7	1			39276.6	1	27025.5	1	44367.6	1					27100.2	1																	65402	1
		59465.1	1			39446.3	1	27026.9	1	44814.9	1					27260.1	1																	65768.9	1
		59821.6	1			39691.1	1	27135.2	1	45157.4	1					27318.9	1																	65943.2	1
		60267.9	1			39696.9	1	27147.4	1	45273.3	1					27439.3	1																	66175.2	1
		60837.7	1			39839.7	1	27154.9	1	45739.2	1					27639.4	1																	66619.8	1
		61061.5	1			40022.7	1	27241.3	1	45777.2	1					27823.6	1																	66725.9	1
						40047.2	1	27279.4	1	46140.5	1					28007.4	1																	67008.1	1
						40274.2	1	27286.1	1	46360.4	1					28226.5	1																	67396.6	1
						40589.1	1	27335.4	1	46659.4	1					28447.9	1																	67645.5	1
						40834.8	1	27393.6	1	46925.9	1					28638.5	1																	67817.3	1
						41097.3	1	27401.6	1	47170.2	1					28786.8	1																	68125.7	1
						41191.9	1	27410.5	1	47424.6	1					29052.2	1																	68251.4	1
						41366.2	1	27492.8	1	48005.9	1					29226.5	1																	68396.4	1
						41523.8	1	27557.1	1	48548.7	1					29474.6	1																	68719.8	1
						41777.9	1	27750.3	1	49216.1	1					29669.5	1																	68771.1	1
						41948.9	1	27859.7	1	49794.6	1					29937.7	1																	69089.5	1
						42164.1	1	27870.5	1							30149.4	1																	69373	1
						42305.3	1	27901.7	1							30376.3	1																	69432.3	1
						42495.7	1	27943.2	1							30626.6	1																	69810.1	1
						42505.2	1	28155.5	1							30849.9	1																	70130.3	1
						42512.1	1	28188.4	1							31071.4	1																	70156.7	1
						42587.2	1	28393.8	1							31187.2	1																	70525.5	1
						42617.4	1	28445.4	1							31248.7	1																	70926	1
						42709.2	1	28450.6	1							31400.5	1																	71261	1
						42726.9	1	28471.8	1							31442.2	1																	71333.7	1
						42752.9	1	28669.5	1							31532.6	1																	71593.6	1
						42806.4	1	28674.9	1							31566.8	1																	72013.4	1
						42838.6	1	28762.5	1							31742.7	1																	72030.9	1
						42859.4	1	28811.7	1							31835.8	1																	72358.9	1
						42909.6	1	28845.2	1							31998.8	1																	72581.7	1
						42912.6	1	28888.9	1							32024.6	1																	72749.5	1
						43021.9	1	28937.8	1							32213.2	1																	73058.9	1
						43275.8	1	29086.2	1							32415.4	1																	73148.7	1
						43473.6	1	29183.6	1							32661.7	1																	73493.2	1
						43635.7	1	29222	1							32836.2	1																	73639.6	1
						43672.4	1	29236.3	1							33003.5	1																	73978.5	1
						43741	1	29354.6	1							33158.2	1																	74316.6	1
						43800.6	1	29522.6	1							33357.6	1																	74470.7	1
						43820.1	1	29543.6	1							33434.7	1																	74639.4	1
						43889.7	1	29569.4	1																									74947.3	1
						43926.4	1	29630.8	1																									75094.7	1
						43953.4	1	29696.5	1																									75514.6	1
						44116.5	1	29771.1	1																									75737.6	1
						44216.3	1	29824.7	1																									75841.2	1
						44343.1	1	29869.5	1																									76231.3	1
						44372.7	1	29977.3	1																									76303.1	1
						44418	1	29986.9	1																									76632.5	1
						44557.2	1	30099.4	1																									77602.1	1
						44571.4	1	30154	1																									77605.3	1
						44790.5	1	30196.6	1																									78034	1
						44935.8	1	30203.7	1																									78365.2	1
						45114	1	30211.8	1																									78440.2	1
						45125.9	1	30231.9	1																									78971.2	1
						45399.4	1	30360	1																									79063.7	1
						45518.3	1	30402.2	1																									79663.1	1
						45629.6	1	30433.3	1																									79906.8	1
						45942.6	1	30455.2	1																									80219.5	1
						45954.9	1	30598	1																									80678.9	1
						46298.5	1	30662.1	1																									80726.7	1
						46454.8	1	30682.6	1																									81364.5	1
						46703	1	30684.5	1																									81377.8	1
						46912.6	1	30700.8	1																									82015.5	1
						46980.2	1	30738.2	1																									82125.5	1
						47176.2	1	30796.2	1																									82415.9	1
						47242.1	1	30866.8	1																									82646.9	1
						47350.6	1	30889.1	1																									82914.1	1
						47464.1	1	30892	1																									83090.5	1
						47566.1	1	30920.9	1																									83454	1
						47820.9	1	30924.1	1																									83487.6	1
						47837.2	1	31027.9	1																									84081.2	1
						48017.9	1	31047.5	1																									84095.3	1
						48350.3	1	31072.5	1																									84620.8	1
						48363.7	1	31141	1																									85004.3	1
						48660.5	1	31326.8	1																									85251	1
						48875.3	1	31397.7	1																									85653.5	1
						48904.2	1	31538.5	1																									85721	1
						49248.8	1	31878	1																									85977.7	1
						49398.2	1	32106.8	1																									86367.1	1
						49663.1	1	32254.8	1																									86702.9	1
						49754.9	1	32523.2	1																									87106.5	1
						50088.1	1	32812.1	1																									87132	1
						50692.5	1	33131.7	1																									87590.1	1
						51103.7	1	33157.4	1																									87806.8	1
								33501.6	1																									88021.4	1
								33727.9	1																									88467.1	1
								33765.5	1																									88608.7	1
								33872.5	1																									89221.7	1
								34099	1																									89415.1	1
								34325.8	1																									89936.2	1
								34478.1	1																									90023.3	1
								34479.1	1																									90465.3	1
								34661.3	1																									90554.3	1
								35085.7	1																									90782	1
								35218.6	1																									90820	1
								35445.9	1																									91234.2	1
								35448.7	1																									91642.2	1
								35696	1																									92040.8	1
								35925.4	1																									92453.3	1
								35958.6	1																									92839.3	1
								36107.2	1																									93198.8	1
								36275.3	1																									93686.1	1
								36714.3	1																									94110.8	1
								36808.5	1																									94805.6	1
								37227.8	1																									95241.8	1
								37723.7	1																									95657.1	1
								37765.6	1																									96221	1
								38131.4	1																									96669.3	1
								38661.3	1																									97143.1	1
								38816	1																									97594.9	1
								39381.2	1																									98057.3	1
								39823.7	1																									98690.3	1
								40155.7	1																									99302.6	1
								40294.4	1																									99876.2	1
								40594.1	1																									100550	1
								40922.6	1																									101356	1
								41248.9	1
								41287.8	1
								41393.5	1
								41544	1
								41698.7	1
								42037.5	1
								42262.6	1
								42334.3	1
								42675.4	1
								42823	1
								42977.3	1
								43216.8	1
								43345.9	1
								43419.5	1
								43474.5	1
								43491.7	1
								43507.6	1
								43539.1	1
								43592.5	1
								44103.6	1
								44548.2	1
								45451.2	1
								45874.9	1
[truncated: 380 more columns]
