# Supplementary material for: FluoEM, virtual labeling of axons in three-dimensional electron microscopy data for long-range connectomics
Source: eLife journal article supplement (doi:10.7554/elife.38976), 2018-08-14
Supplement: supp [file elife-38976-supp-v1.zip › elife_poa_e38976_Figure_1_source_data_3.xlsx]

## Sheet: Sheet1
uniqueFraction_binDists	uniqueFraction_binFracs	ax001_dist	ax001_counts	ax002_dist	ax002_counts	ax003_dist	ax003_counts	ax004_dist	ax004_counts	ax005_dist	ax005_counts	ax006_dist	ax006_counts	ax007_dist	ax007_counts	ax008_dist	ax008_counts	ax009_dist	ax009_counts	ax010_dist	ax010_counts	ax011_dist	ax011_counts	ax012_dist	ax012_counts	ax013_dist	ax013_counts	ax014_dist	ax014_counts	ax015_dist	ax015_counts	ax016_dist	ax016_counts	ax017_dist	ax017_counts	ax018_dist	ax018_counts	ax019_dist	ax019_counts	ax020_dist	ax020_counts	ax021_dist	ax021_counts	ax022_dist	ax022_counts	ax023_dist	ax023_counts	ax024_dist	ax024_counts
0	0	2139.86	124	1793.72	125	705.548	127	941.157	127	1911.29	125	2565.3	120	1631.45	126	3106.15	109	3337.65	108	3671.43	95	329.843	127	3812.82	102	2610.86	115	2489.45	114	2506.94	121	2850.52	118	2096.88	126	2167.88	123	1919.82	126	3488.43	102	2582.51	118	3349.17	98	2457.03	122	2834.25	116
2500	0	2186.95	123	1799.08	123	851.047	127	1142.32	127	2182.4	123	2814.69	119	1632.26	126	3125.34	108	3449.33	104	3726.08	89	387.046	127	3861.46	100	2662.43	111	2518.76	113	2531.39	121	2851.01	117	2160.57	126	2220.94	123	1968.08	126	3516.77	100	2615.66	118	3362.16	94	2574.59	121	2854.52	109
5000	2	2263.47	122	1936.34	123	861.844	127	1312.64	127	2471.69	118	3115.61	115	1639.8	126	3220.39	102	3897.33	95	3737.02	88	566.885	127	3884.87	96	2725.44	108	2548.39	112	2535.44	121	2932.04	115	2167.29	126	2237.71	122	1985.38	126	3516.82	94	2619.89	116	3396.23	91	2591.3	117	2859.18	109
7500	15	2348.73	122	1964.94	123	1154.42	127	1578.18	126	3167.98	101	3593.72	105	1651.85	126	3444.07	96	4007.3	86	3863.46	88	655.267	127	3922.79	92	2730.57	108	2567.27	111	2546.29	121	2953.96	114	2188.58	125	2296.47	121	1993	126	3549.79	93	2667.77	116	3427.14	91	2750.17	116	2863.68	108
10000	28	2561.72	122	1994.49	122	1465.71	126	1597.15	125	3451.09	98	3981.75	95	1653.5	126	3528.12	94	4226.63	79	3956.77	87	913.599	127	3924.71	89	2744.7	108	2575.3	110	2562.09	121	2958.68	112	2253.41	122	2399.83	119	2073.15	123	3566.63	93	2670.38	116	3432.39	89	2752.81	115	2868.21	108
12500	53	2634.41	119	2248.02	121	1667.11	125	1844.75	122	3734.95	98	4455	87	1664.2	126	3685.28	90	4495.04	78	4072.22	85	986.124	127	3926.06	87	2761.59	108	2620.8	110	2567.1	121	2994.81	110	2434.01	118	2447	117	2212.33	121	3576.28	93	2737.69	115	3457.28	88	2795.44	110	2872.98	107
15000	79	2724.49	116	2476.89	115	1820.66	124	2029.58	122	4300.08	90	4932.64	74	1692.62	126	3763.31	81	4748.64	67	4274.37	79	1024.15	127	3926.84	87	2778.6	108	2627.56	110	2580.84	121	3050.34	108	2538.32	117	2574.68	116	2223.87	120	3605.46	93	2768.48	114	3518.87	87	2870.78	108	2875.44	106
17500	89	2837.73	111	2511.19	111	2050.42	124	2210.24	122	4671.74	87	5272.45	69	1695.97	126	3946.43	77	5448.13	52	4479.37	77	1088.66	127	3927.65	86	2797.17	104	2635.45	108	2588.12	121	3109.62	104	2723.47	113	2665.87	116	2402.37	113	3621.64	93	2859.77	111	3529.71	85	2903.77	107	2880.68	105
20000	105	2972.44	108	2936.5	104	2197.25	124	2315.72	120	4916.72	84	5670.01	61	1696.33	126	4515.88	67	6160.74	34	4527.36	69	1172.8	127	3947.12	86	2946.37	103	2663.74	108	2595.83	119	3219.25	99	2784.46	110	2738.4	116	2492.42	113	3626.68	93	2987.29	109	3551.78	85	2953.95	104	2883.58	105
22500	113	3050.55	107	3155.16	97	2525.79	119	2688.49	118	5210.06	77	6185.55	53	1711.66	126	4582.65	58	6363.06	24	4710.43	65	1257.47	126	3947.37	86	3062.23	101	2742.67	108	2600.09	118	3274.66	95	2930.51	109	2899.55	114	2645.93	112	3640.76	93	3016.8	108	3565.37	85	3028.98	102	2888.61	104
25000	115	3122.24	104	3485.63	86	2581.86	115	2696.65	114	5676.2	67	6603.43	47	1722.46	126	4945.86	50	7727.42	16	4920.54	62	1376.68	126	3950.58	86	3184.44	98	2775.67	105	2617.88	118	3411.11	93	3017.29	107	3128.01	107	2780.34	109	3670.64	92	3175.43	107	3589.17	83	3084.26	99	2890.47	104
27500	115	3350.18	103	3525.41	79	2766.38	114	3325.72	109	5970.36	63	6663.76	41	1723.2	126	5381.43	41	7758.99	6	4986.07	62	1404.43	126	3954.97	85	3305.32	95	2931.33	105	2618.33	118	3421.57	91	3152.91	105	3168.26	103	2871.31	105	3707.25	91	3254.01	103	3618.14	83	3101.7	95	2891.21	104
30000	118	3450.46	97	4041.21	68	2817.34	110	3546.65	90	6407.4	59	6681.15	41	1748	126	5501.46	35	8733.03	5	5380.4	59	1481.95	126	3955.75	85	3377.45	92	2946.78	102	2649.03	118	3577.46	90	3320.96	101	3376.55	98	3163.31	101	3720.94	91	3284.81	101	3691.58	82	3267.33	94	2893.49	104
32500	124	3667.51	92	4115.32	58	3197.14	108	3721.88	85	6781.25	52	6739.95	31	1764.57	126	6077.87	30	8798.34	4	5433.71	54	1717.97	125	3961.04	82	3547.22	91	3152.45	99	2681.01	116	3648.85	88	3421.65	94	3442.02	90	3235.01	98	3725.41	88	3427.85	99	3705.6	82	3287.1	90	2901.81	104
35000	125	3759.92	88	4473.17	57	3470.01	100	3872.72	76	7049.41	49	6846.2	31	1814.6	126	6263.85	27	10161.1	3	5867.17	50	1952.47	122	3963.92	82	3550.15	87	3161.46	95	2683.07	116	3704.54	85	3694.18	90	3627.63	88	3487.18	93	3735.19	88	3493.12	96	3809.49	81	3465.52	89	2902.74	104
37500	125	3924.51	85	4579.88	50	3664.33	98	4223.76	66	7386.56	44	6934.34	26	1825.64	123	6515.23	19	10491.5	3	5890.84	41	2058.32	118	3985.55	82	3596.69	87	3391.52	93	2729.41	115	3906.4	82	3842.78	82	3771.36	87	3584.34	86	3802.71	86	3728.76	90	3853.61	81	3568.89	84	2903.75	104
40000	125	4004.95	78	4925.3	47	3946.11	91	4317.12	59	7779.69	37	7102.36	24	1893.64	123	6895.11	12	11454.2	3	6242.57	38	2268.34	117	3989.98	82	3812.29	84	3469.8	91	2782.53	114	3979	80	4008.21	76	3830.81	82	3637.91	85	3871.57	86	3765.39	87	3981.2	79	3641.91	84	2918.85	104
42500	126	4220.13	72	4949.47	47	4188.04	84	4633.76	58	8232.56	29	7108.48	22	1965.93	123	7316.56	12	11463.2	3	6441.62	36	2475.36	113	3992.56	82	3852.85	81	3622.06	87	2786.64	109	4024.34	78	4067.92	75	4007.94	80	4112.74	78	3906.67	84	4013.77	84	3983.96	78	3796.19	76	2919.28	104
45000	126	4442.75	66	5110.75	43	4279.73	80	4702.45	55	8682.6	24	7353.64	18	1974.87	123	7511.11	10	12589.7	3	6450.36	35	2626.91	111	4003.48	82	3985.43	77	3753.18	86	2890.4	107	4208.28	77	4158.54	75	4092.08	78	4217.21	67	3943.33	80	4059.83	83	4259.4	77	3797.71	73	2943.16	104
47500	126	4596.53	60	5263.25	40	4682.91	78	5052.26	50	9091.44	24	7427.66	16	1990.51	122	8102.78	6	13298.5	3	6600.71	34	2656.99	111	4069.96	81	4059.35	75	3759.56	84	2899.97	104	4255.1	76	4299.03	72	4191.98	73	4469.44	63	3957.56	79	4227.73	79	4362.69	74	3878.72	72	2944.72	103
50000	126	4813.97	50	5475.12	37	4709.56	72	5255.41	47	9521.9	22	7515.92	16	2054.82	122	8300.02	6	13833.5	3	6781.16	32	2895.93	105	4181.93	79	4189.21	72	3985.77	83	3033.57	101	4350.15	74	4507.95	67	4313.87	69	4638.35	55	3958.38	79	4304.27	79	4427.94	69	4071.78	71	2977.8	102
52500	126	5003.3	41	5630.41	34	5107.48	66	5427.95	46	9990.45	20	7601.74	14	2143.4	122	9012.05	4	14770.2	2	7002.43	25	2966.71	103	4308.98	79	4209.97	68	4009.29	77	3070.92	99	4486.07	71	4741.4	64	4534.38	63	5099.39	44	4048.09	74	4531.4	74	4574.68	67	4179.05	64	3023.17	101
55000	127	5324.43	34	5919.39	32	5225.98	57	5762.99	43	10349.1	18	7672.84	13	2239.34	121	9274.54	4	16238.2	1	7215.69	22	3253.86	99	4340.02	76	4414.63	68	4211.55	73	3134.35	98	4607.72	66	4828.5	57	4563.77	58	5134.74	37	4077.33	73	4554.74	68	4591.82	65	4352.5	60	3071.43	100
57500	127	5620.54	31	5950.06	32	5639.88	50	5895.6	42	10584	16	7695.07	13	2293.2	120	10030.7	3	16760.9	1	7241.47	19	3288.46	94	4399.26	75	4518.4	67	4264.65	71	3156.27	97	4646.69	64	5066.65	52	4809.33	55	5561.97	34	4169.97	73	4676.14	66	4804.81	65	4484.27	59	3072.53	98
60000	127	5683.76	26	6109.8	27	5646.44	46	6139.48	42	10995.4	14	7707.33	12	2316.25	120	10276.7	3	16999.8	1	7471.88	18	3405.08	94	4441.9	70	4560.55	65	4383.65	69	3250.64	95	4765.39	64	5109.95	52	4898.31	50	5596.95	33	4298.97	70	4728.73	60	4920.92	64	4611.48	58	3112.61	96
62500	127	6100.31	20	6128.29	24	6056.5	43	6464.87	31	11258.1	12	7714.27	12	2365.88	120	10670.1	3	17044.6	1	7544.14	17	3696.22	88	4456.24	70	4615.29	61	4430.55	65	3274.94	93	4872.21	59	5144.03	51	5185.31	43	6081.08	28	4304.28	66	4782.29	57	5001.18	64	4851.25	54	3148.26	95
65000	127	6184.64	18	6304.83	17	6100.7	37	6587.45	24	11438.8	12	7885.11	12	2366.03	120	11307.7	3	17100.4	1	7712.22	16	3915.01	75	4481.64	70	4779.62	57	4672.95	65	3395.7	92	5061.56	57	5163.02	50	5227.45	40	6188.61	27	4430.97	66	4898.45	55	5202.86	62	4883.59	53	3175.73	94
67500	127	6313.56	16	6413.69	17	6594.92	34	6704.78	23	11767.8	12	7915.59	12	2459.19	118	11482.9	3	17159.6	1	7945.14	16	4229.54	66	4502.87	68	4816.14	56	4688.69	62	3426.71	90	5180.92	53	5213.06	45	5451.19	36	6427.47	26	4547.72	66	5006.87	51	5263.06	54	5055.29	51	3215.64	94
70000	127	6673.99	13	6490.02	14	6632.13	30	6958.04	22	12067.4	10	8013.05	10	2529.3	118	12570.8	2	17438.1	1	8228.46	12	4418.98	56	4506.82	62	5026.81	54	4804.49	62	3508.91	88	5434.62	49	5217.96	43	5579.2	33	6604.35	26	4559.2	64	5174.87	48	5336.08	50	5241.51	51	3241.87	92
72500	127	6729.94	13	6643.92	12	6992.57	28	7063.89	20	12416.5	10	8073.08	10	2570.68	117	12622.4	1	17460.1	1	8602.37	11	4640.29	50	4542.11	60	5027.99	52	5001.23	54	3579.92	87	5452.27	45	5374.16	40	5591.89	33	6644.18	22	4733.43	63	5291.87	43	5466.63	49	5275.13	48	3245.57	91
75000	127	7031.89	13	6677.01	11	7099.44	26	7362.89	17	12801	9	8111.79	10	2654.68	114	13263.4	1	17741	1	8722.54	11	4699.52	49	4562.26	60	5179.64	51	5055.54	54	3599.29	87	5722.12	42	5521.1	38	5688.19	33	7043.15	19	4774.74	58	5345.31	37	5510.66	49	5443.87	47	3259.12	91
77500	127	7217.63	11	6819.78	8	7332.82	26	7548.23	17	12981.6	9	8230.16	10	2763.2	113	13717	1	17820.6	1	8854.01	10	4979.08	47	4616.27	59	5315.86	47	5229.06	53	3691.73	85	5754.81	39	5620.98	36	5804.27	30	7120.73	14	4829.86	56	5461.8	36	5529.15	48	5446	45	3324.68	88
80000	127	7300.11	11	6950.43	8	7692.02	23	7590.78	15	13125.4	7	8377.1	10	2828.72	111	14072	1	18239.1	1	9185.43	10	5303.53	39	4654.85	57	5520.24	45	5325.18	48	3692.21	82	5991.18	38	5746.61	30	5824.21	29	7460.6	13	4912.27	55	5521.48	34	5558.13	43	5624.96	42	3346.32	86
82500	127	7713.05	8	6988.36	8	7897.82	23	7769	14	13479.9	7	8775.07	9	2873.65	111	14620.5	1	19062.5	1	9256	10	5509.08	31	4655.02	57	5538.47	43	5412.77	45	3770	82	6076.36	35	5827.56	29	5874.13	27	7478.4	13	5033.69	51	5733.07	30	5710.1	42	5674.16	42	3397.67	83
85000	127	7736.85	6	7124.98	7	8286.71	23	8029.32	13	13851.5	7	8799.07	8	2934.7	109	14716.5	1	19968.8	1	9744.49	10	5779.02	30	4656.18	57	5717.7	42	5575.34	42	3816.19	80	6206.26	34	6046.7	29	5928.31	26	7788.32	11	5073.27	49	5831.67	27	5835.39	39	5868.63	38	3432.66	83
87500	127	8076.11	6	7393.94	7	8469.26	22	8231.88	13	14408.9	5	8995.16	5	3007.25	107	15370.8	1	21263.3	1	10023.1	4	5995.63	25	4703.09	57	5737.65	41	5721.7	38	3860.45	80	6296.26	34	6052.25	29	6003.32	24	7992.53	10	5168.73	47	5964.02	25	5995.44	39	6009.96	38	3438.96	83
90000	127	8274.15	5	7597.03	5	8951.81	22	8260.84	13	14862.2	3	9023.61	5	3027.38	104	15608.8	1	22637.7	1	10133.2	4	6379.06	23	4747.09	56	5916.33	41	5882.65	37	3960.44	79	6457.59	31	6316.92	27	6078.93	22	8143.19	10	5276.84	43	6023.33	24	6117.76	35	6019.24	38	3452.72	83
92500	127	8522.1	5	7783.62	4	8954.4	20	8651.19	10	15245.7	3	9060.75	5	3065.43	103	15691.9	1	23449.1	1	10277.2	4	6443.55	23	4748.27	56	5922.48	41	5918.04	36	4059.36	79	6498.2	28	6346.92	25	6249.64	21	8373.18	9	5279.41	41	6258.34	21	6240.72	34	6210.96	34	3456.74	82
95000	127	8730.9	5	7788.98	4	9353.85	19	8774.92	10	15598.1	2	9062.89	5	3183.45	102	15750.5	1	24936.3	1	10597.7	4	6896.33	23	4807.62	52	6059.15	39	6135.59	35	4107.32	69	6634.42	28	6623.85	23	6296.77	19	8548.19	8	5392.29	38	6305.3	19	6382.85	29	6263.17	31	3475.14	82
97500	127	9023.55	5	7913.36	3	9597.19	17	9360.19	9	15947.6	1	9174.51	5	3238.9	102	15904.6	1	26072.6	1	10684	4	7043.58	19	4830.26	50	6111.21	39	6275.51	34	4144.87	68	6684.73	26	6773.72	22	6342.96	15	8761.53	8	5493.62	37	6486.27	17	6414.99	29	6448.09	27	3485.84	82
100000	127	9088.6	5	7999.39	3	9806.5	16	9396.59	8	16505.3	1	9433.75	4	3306.12	101	16039.8	1	27640.8	1	10937.9	4	7407.67	18	4848.28	47	6288.5	38	6356.19	32	4171.33	68	6809.15	23	6815.29	21	6479.76	15	8847.99	8	5541.53	33	6495.75	16	6501.86	28	6524.63	27	3494.15	82
		9400.44	5	8097.55	3	10214.1	16	9641.68	8	16964.8	1	9665.3	3	3431.56	101	16175	1	29081	1	11037.9	4	7677.14	18	4893.74	45	6378.38	35	6613.89	32	4283.11	68	6855.21	23	7148.12	21	6761.75	13	9026.93	7	5681.85	31	6656.04	15	6673.16	28	6694.18	27	3508.33	82
		9412.32	5	8232.03	3	10487.8	13	10004.1	7	17709.8	1	9814.33	3	3488.31	99	16237.9	1	30457.8	1	11246.3	4	7881.19	17	4909.33	45	6454.09	34	6681.52	31	4306.44	68	7069.98	21	7171.43	21	6817.16	13	9321.44	7	5696.88	31	6776.08	14	6723.73	27	6707.25	26	3520.45	82
		9771.87	4	8426.52	3	11124.4	12	10389.5	7	18330.6	1	9915.34	3	3539.31	97	16326.7	1	31778.3	1	11462.1	4	8041.74	14	4925.78	45	6466.78	34	6813.37	31	4406.13	67	7070.17	21	7466.28	20	6903.6	11	9357.54	7	5848.33	30	6872.31	11	6945.88	26	6846.05	26	3542.52	82
		9978.06	4	8591.91	3	11205.1	12	10428.6	7	19112.9	1	10033.1	3	3619.83	95	16414.9	1	33154	1	11749.1	4	8282.43	14	4927.38	43	6576.85	33	6973.37	30	4468.43	64	7301.27	21	7535.94	19	6964.27	10	9704.4	5	5955.15	29	6950	11	7007.49	25	6851.22	26	3576.56	80
		10320.1	4	8626.21	3	11898.5	12	10771.5	7	19586.5	1	10080.7	3	3659.91	94	16519.3	1	34847.2	1	11804.8	4	8404.09	14	4932.62	43	6750.11	32	7086.79	27	4481.2	62	7416.61	16	7832.12	18	7078.76	9	9745.88	5	6190.24	27	7133.95	11	7118.44	24	6921.29	26	3587.89	79
		10339.2	4	8907.54	3	11983.5	10	10851.7	6	19934.4	1	10209.5	3	3662.92	94	16560.4	1	36424	1	12360.4	4	8406.97	14	4948.11	43	6798.3	32	7266.34	26	4578.29	61	7578.43	16	7950.87	17	7147.69	9	10077.7	5	6191.95	24	7194.9	11	7245.11	24	7011.07	23	3620.41	79
		10882.5	4	8985.89	2	12566.1	9	11362	6	20366.3	1	10210.9	3	3718.42	94	16646.3	1	37690.1	1	12463.8	4	8498.13	14	5037.86	42	7082.07	30	7273.1	25	4674.25	60	7717.69	12	8004.44	16	7341.05	9	10155.6	4	6396.1	22	7377.3	10	7338.37	22	7139.13	20	3638.78	78
		10990.1	4	9091.93	2	12577.2	8	11384.2	6	20705.3	1	10380.5	3	3756.5	91	16741.1	1	39056	1	12830.2	4	8810.18	12	5037.93	42	7086.48	30	7506.44	24	4706.69	60	7872.96	10	8225.23	14	7504.74	8	10573.7	4	6421.21	19	7614.57	10	7450.86	22	7323.37	20	3662.8	78
		11250.7	4	9486.3	1	12961.1	7	11866.3	6	21166.1	1	10422.7	3	3823.8	88	16751.5	1			12968.9	3	8996.19	10	5044.46	42	7279.84	29	7576.92	23	4840.19	60	7938.01	10	8268.66	14	7565.6	8	10634.3	4	6588.7	18	7677.07	8	7703.03	17	7436.98	19	3687.25	78
		11555.7	4	9784.23	1	13065	7	12272.1	6	21559.7	1	10435.4	3	3937.14	86	16776.9	1			13342.4	3	9255.37	9	5051.76	42	7410.8	27	7715.81	21	4846.76	56	8151.12	10	8475.82	12	7604.33	8	10743	4	6675.92	16	7974.4	8	7758.42	17	7580.39	19	3720.32	76
		11584.5	3	9810.34	1	13497.4	7	12388.5	6	22011.8	1	10507.9	3	3979.85	81	16836.5	1			13402	3	9599.02	8	5080.65	42	7477.64	27	7921.63	21	5032.85	53	8276.58	10	8565	11	7928.4	8	11023.8	3	6711.65	16	8022.2	7	7984.72	13	7772.95	18	3722.65	76
		11963.1	3	9849.42	1	13571.2	7	12628.1	6	22318.8	1	10510.5	3	4004.78	81	16949.4	1			13781.6	2	10067.1	8	5099.3	41	7651.95	26	7970.54	21	5110.53	48	8410.83	10	8773.76	10	8012.87	8	11246.7	3	6745.44	16	8262.15	7	8054.52	13	7788.77	18	3736.31	75
		12258.5	3	10306.7	1	14234.9	7	12682.9	6	22679.5	1	10750.3	3	4022.25	77	16969.8	1			13827.5	2	10107.7	8	5119.71	41	7732.8	25	8235.84	19	5164.77	47	8558.84	10	8921.69	9	8093.16	7	11440.3	2	6771.6	16	8478.22	7	8311.7	13	8170.74	16	3803.49	73
		12481.8	2	10319.1	1	14292.5	7	13137.5	5	23012.4	1	10879	3	4097.66	77	17006.2	1			14091.4	2	10506.6	8	5127	36	7805.93	25	8274.38	18	5259.74	46	8650.12	10	9018.97	9	8149.74	7	11654.8	2	6832.53	16	8610.47	7	8365.32	12	8216.47	16	3889.9	72
		12611.2	2	10617.4	1	14854.8	7	13385.4	4	23338.8	1	11002.8	2	4214.01	77	17038.3	1			14566.5	2	10726.6	8	5195.7	36	8035.04	25	8558.32	16	5358.02	43	8930.08	10	9169.64	9	8316.96	6	11973.9	2	6843.3	15	8761.72	7	8601.2	11	8663.98	15	4058.16	69
		13143.1	2	10672.2	1	14955.1	7	13444.5	4	23781.6	1	11178.3	2	4317.21	76	17050.7	1			14646.4	1	11349.6	7	5215.61	34	8115.95	21	8561.24	14	5372.68	43	8966.01	9	9238.74	8	8331.88	4	12027.7	2	6858.04	15	8934.61	7	8641.55	11	8742.66	12	4266.36	66
		13181	2	10949.3	1	15326	6	13641.7	4	24130.8	1	11315.1	1	4342.42	75	17154.8	1			15067.1	1	11557.1	6	5216.21	34	8248.63	20	8825.06	14	5476.27	43	9263.42	8	9374.85	8	8524.42	4	12418.4	2	6871.75	15	9052.32	6	8825.06	11	9032.88	11	4363.42	65
		13554.4	2	11169.6	1	15743.5	4	13900.1	4	24383.1	1	11555.8	1	4468.12	73	17190.5	1			15479.7	1	11898.7	6	5223.9	31	8345.03	20	8881.37	13	5592.24	41	9269.23	7	9530.3	8	8573.86	4	12599.5	2	6896.04	13	9357.07	6	9016.8	10	9098.4	11	4437.4	65
		13724.1	2	11217.7	1	15914.5	3	14356.4	4	24769.9	1	11921.3	1	4503.32	70	17290.8	1			15902.1	1	12217.7	6	5251.11	31	8441.47	19	9095.99	13	5726.95	40	9513.56	5	9679.23	7	8652.22	3	12819.4	2	6940.31	13	9497.2	6	9069.42	9	9378.1	10	4637.27	64
		14115.1	2	11240.1	1	16446.3	3	14366	3	25131.2	1	11973.9	1	4557.84	70	17299.2	1			16175.8	1	12991.6	5	5260.17	31	8609.47	19	9223.24	13	5840.67	39	9562.14	5	9742.27	6	8815.86	3	13273	2	7084.87	11	9636.83	6	9382.23	8	9386.62	10	4886.68	61
		14160.8	2	11771.2	1	16945.7	3	14906.5	3	25543.2	1	12141.5	1	4694.82	69	17631.7	1			16493.8	1	13292.9	3	5260.36	31	8677.16	19	9440.48	13	5856.43	37	9793.52	4	9855.78	6	8990.6	1	13342.7	2	7122.17	11	9794.34	5	9515.39	5	9685.66	9	5119.14	60
		14486.5	2	11799.8	1	17206.5	3	15061.5	3	25844.6	1	12245.1	1	4710.86	65	17701.6	1			16828	1	13546.7	3	5294.52	30	8820.57	18	9517.34	11	6026.75	35	9846.43	4	10041.9	6	9056.64	1	13644.3	1	7191.92	11	9886.77	5	9622.38	5	9810.87	9	5336.52	57
		14522	2	11833.3	1	17798	3	15466.8	3	26531.4	1	12372.9	1	4781.32	65	17924.8	1			17122.6	1	13595.9	3	5327.05	26	8918.13	18	9852.08	7	6040.93	35	10080.4	4	10153.6	6	9255.46	1	13863.4	1	7262.11	11	10132.8	4	9799.76	4	10087.3	9	5596.9	55
		14942.4	1	12162.3	1	17927	2	15807.3	3	27062.6	1	12679.7	1	4890.7	65	17942.4	1			17375.1	1	13968.2	2	5332.71	26	9057.37	18	9928.49	7	6041.19	35	10110.1	4	10375.1	6	9340.06	1	13967.3	1	7383.74	11	10142.2	4	9892.49	3	10163.6	8	5766.32	53
		14963.4	1	12236.8	1	18446.4	2	15979.2	3	27566.1	1	12708.4	1	4921.49	61	17963.7	1			17642.1	1	14173.3	1	5387.92	25	9160.94	18	10247.1	6	6041.91	34	10249.9	4	10429.5	6	9400.35	1	14304.3	1	7487.66	11	10428.3	4	10187.2	3	10381.2	7	5838.58	53
		15219.4	1	12256.9	1	18848.6	2	16250.6	3	28157.4	1	13105.5	1	4961.65	60	18449.4	1			17927.2	1	14190.4	1	5405.15	24	9283.41	18	10288.9	4	6043.89	34	10436.8	3	10603.9	6	9403.48	1	14410.7	1	7507.29	10	10456.7	3	10213.7	3	10470.5	7	5919.95	51
		15384.9	1	12279.1	1	18915.1	2	16486.9	3	28683.3	1	13210.3	1	5030.63	60	18555.4	1			18140.1	1	14199.8	1	5565.12	22	9289.38	18	10531.1	4	6071.5	34	10574.2	3	10672.3	5	9498.48	1	14666.3	1	7647.07	9	10726	3	10501.1	3	10693.8	6	6001.9	49
		15534.6	1	12499.7	1	19369.3	2	16738.4	3	29418.3	1	13429	1	5090.56	60	19121.2	1			18420	1	14199.9	1	5580.06	22	9475.25	18	10651	4	6110.5	32	10667.1	3	10814.8	5	9509.09	1	14854.3	1	7732.47	9	10775.8	3	10535.7	3	10827	6	6091.29	49
		15827.1	1	12580.5	1	19439.9	2	17006.6	3	29787.1	1	13499.2	1	5104.6	60	19552.1	1			18650.3	1	14369.2	1	5589.09	21	9577.8	17	10848.1	4	6168.41	32	10849.4	2	10905.1	5	9648.4	1	15083.2	1	7761.63	9	10934.6	3	10636.8	3	10924.1	6	6195.57	49
		15903.8	1	12704.8	1	19937.9	2	17086.1	3	30315.8	1	13637.1	1	5165.78	59	19555.4	1			18861.5	1	14431.6	1	5664.85	20	9682.26	17	10928.7	4	6381.41	31	10892.7	2	11110	5	9665.5	1	15327.6	1	7953.02	8	11044.6	3	10834.8	3	11113.1	5	6475.11	45
		16209.7	1	13002.8	1	20180.4	2	17558.1	3	30801	1	13836.1	1	5183.6	58	20000.3	1			19099.2	1	14780	1	5702.2	20	9817.01	17	11154.1	4	6418.97	31	11070.5	2	11164.4	5	9841.56	1	15619.8	1	7996.73	8	11234.8	3	11074.7	3	11221.1	5	6722.27	42
		16247.5	1	13068.6	1	20500.8	2	17830.7	3	31046.1	1	13889.4	1	5235.95	57	20356.9	1			19374.1	1	15166.3	1	5773.44	20	9817.36	17	11245.7	4	6421.28	29	11100.7	2	11368	5	9906.81	1	15758.9	1	8112.47	8	11330.9	3	11081.4	2	11379.8	5	6928.84	40
		16734.9	1	13189.5	1	20779.9	2	18274.6	3	31239.6	1	14079.4	1	5265.95	56	20365.6	1			19664.6	1	15479.5	1	5820.4	20	9936.27	17	11438.8	4	6440.92	29	11239.7	2	11432.7	5	9959.34	1	16064.5	1	8186.93	8	11566.6	3	11279.2	2	11563.3	5	7048.45	39
		16794	1	13374.8	1	21106.8	1	18382.4	3	31592.8	1	14337.3	1	5323.09	55	20694.1	1			19879.4	1	15592.1	1	5857.16	18	10060.7	17	11529.1	3	6479.41	29	11446.1	2	11635.2	5	9991.41	1	16225.5	1	8281.33	7	11585.9	3	11336.6	2	11708	5	7272.19	34
		17245.9	1	13530.2	1	21326.5	1	18687.4	3	32073.4	1	14565.8	1	5332.32	54	20843.9	1			20102.2	1	15855.8	1	5929.27	18	10130.7	17	11771.8	3	6536.87	29	11471.9	2	11725.6	5	10200.4	1	16322.2	1	8327.15	7	11811.8	3	11345.3	2	11722.3	5	7380.33	34
		17336.8	1	13797	1	21670.5	1	18821	3	32683.5	1	14762.2	1	5373.14	54	21147.1	1			20307.4	1	16056.4	1	5980.68	17	10185.7	17	12011	3	6588.28	29	11755.8	2	11841.2	5	10212.9	1	16712	1	8332.28	7	11896.8	3	11526.3	2	11838.8	5	7433.68	34
		17555.3	1	14152.9	1	22213.4	1	19164.8	3	33172.8	1	15092.7	1	5398.86	54	21166.2	1			20608	1	16302.2	1	6085.68	17	10325.6	17	12029.1	3	6607.79	28	11764	2	12049.2	5	10218.5	1	16731.4	1	8529.07	7	12179.4	2	11598.7	2	11993.6	4	7491.66	33
		17667.8	1	14231.5	1	22232.1	1	19456.9	3	33569.2	1	15119.2	1	5462.31	53	21794.2	1			20872.5	1	16425.6	1	6180.98	17	10407.8	15	12448.7	2	6695.23	27	12003	2	12147	4	10239.2	1	17090	1	8571.09	7	12245.6	2	11685.7	2	12048.6	4	7510.41	33
		17996.3	1	14361.8	1	22751.5	1	19756	3	34043.7	1	15190.8	1	5462.63	50	21808.3	1			21115.9	1	16617.8	1	6362.81	15	10436.7	15	12452.3	2	6734.28	25	12003.3	2	12210.5	4	10437	1	17167.9	1	8685.01	7	12538.2	2	11790.1	2	12185.9	4	7559.24	32
		18105	1	14635.8	1	22807.1	1	19760.9	2	34450.4	1	15377.2	1	5504.55	50	22400.9	1			21449.9	1	17010.7	1	6378.26	14	10511.2	14	12725.9	2	6739.44	25	12224.3	2	12368.9	4	10578.9	1	17451.3	1	8799.09	7	12585.6	2	11878.1	2	12247.9	4	7602.92	32
		18230.3	1	14672	1	23303.2	1	20070.6	2	34841.5	1	15547.1	1	5576.17	50	22696	1			21767.6	1	17083.2	1	6435.94	12	10601.2	14	12762.8	2	6844.15	25	12279.4	2	12405.1	4	10589.2	1	17700.8	1	8901.38	6	12840	2	12004.6	2	12387.8	4	7653.54	31
		18405.3	1	14710.4	1	23450.8	1	20441.6	2	35231.9	1	15579.2	1	5586.88	50	23026	1			22180.5	1	17302	1	6564.9	11	10625.8	14	13091.4	2	6897.38	25	12436.5	2	12504.4	4	10625.1	1	17920	1	8942.79	6	12852.7	2	12012.1	2	12506.5	4	7806	29
		18467.6	1	15056.7	1	23822.7	1	20719.6	2	35825.4	1	15770.1	1	5685.12	50	23206.8	1			22427.8	1	17508	1	6650.66	10	10762.4	14	13103.9	2	7004.97	23	12486.2	2	12588.3	4	10728	1	18202.1	1	9069.71	6	13002	2	12080.8	2	12625.7	4	7916.28	29
		18616.3	1	15329.4	1	23860.3	1	21491.6	2	36332.8	1	16000.1	1	5710.92	49	23247.6	1			22668.4	1	17583	1	6691.11	10	10872.8	14	13337.6	2	7054.63	22	12730.9	2	12782.4	4	10794.8	1	18559.6	1	9229.25	6	13141.5	2	12091.7	2	12722	2	8049.02	29
		18893	1	15412.9	1	24354.6	1	21674.3	2	36852.6	1	16035.3	1	5793.8	48	23791.7	1			22933.2	1	17856.5	1	6836.17	8	10917	14	13599.4	2	7230.83	21	12926	2	12817.7	4	10832	1	18613.5	1	9340.62	6	13154.2	2	12116.7	2	12730.8	2	8194.53	29
		18934.3	1	15714	1	24389.7	1	21918.6	2	37347.4	1	16227.5	1	5815.12	45	23860.6	1			23205.4	1	17945.6	1	6940.09	8	11001.3	14	13618.7	2	7237.03	21	12941.3	2	13111.2	4	10840.2	1	18964.1	1	9534.35	5	13293.5	2	12135.3	2	12783.8	2	8443.31	29
		19295.3	1	15869.2	1	25136.6	1	21962.7	2	37783.2	1	16474	1	5897.58	45	24454.8	1			23540.1	1	18155.9	1	7060.8	8	11127.3	14	13905.7	2	7379.03	20	13229.2	2	13210.6	4	10973.8	1	19031.7	1	9718.08	5	13366.8	2	12326.7	2	12813.4	2	8895.51	24
		19354.4	1	15991.4	1	25241.3	1	22398.2	2	38274.9	1	16740.8	1	5953.88	45	24721.3	1			23710.2	1	18367.1	1	7278.29	7	11202.9	13	13987.8	2	7428.02	19	13268	2	13331.6	4	11069.7	1	19294.7	1	9855.42	5	13410	2	12446.3	2	12857.2	2	9136.72	21
		19652.4	1	16128.8	1	25672.7	1	22506	2	38787.9	1	17039.9	1	6026.96	43	24971.2	1			23918.9	1	18504	1	7300.01	7	11229.6	13	14178.5	2	7433.26	16	13486.7	2	13418.3	4	11086.2	1	19375.4	1	10084.2	5	13606.2	2	12581.2	2	12875.1	2	9250.38	21
		19734.1	1	16237.4	1	25994.7	1	22864.6	2	39133.6	1	17161.8	1	6100.32	43	25502.2	1			24107.7	1	18781	1	7460.19	6	11336.9	13	14392.4	2	7570.2	16	13487.8	2	13542.8	4	11150.4	1	19563.1	1	10094.3	5	13744	2	12695.8	2	12917.1	2	9384.91	20
		19982.4	1	16498.1	1	26173.5	1	23238.6	2	39592.6	1	17417.3	1	6150.91	43	25523.6	1			24353.2	1	18888.6	1	7462.52	6	11475.9	13	14443	2	7576.48	14	13720.7	2	13719.7	4	11176.6	1	19797.5	1	10247	5	13761.8	2	12837.1	2	13043.4	2	9516.02	18
		20165.1	1	16649.8	1	26748.6	1	23851.7	1	40017.4	1	17539.6	1	6251.53	42	26066	1			24628.7	1	19110	1	7566.46	6	11512.4	13	14678.4	2	7716.97	13	13827.6	2	13790.7	4	11246.3	1	19964.3	1	10338.9	3	14008.1	2	12967.6	2	13103.3	2	9651.24	17
		20313.9	1	16695	1	26867.2	1	23886.7	1	40606	1	17744.2	1	6351.22	40	26423.8	1			24860.2	1	19425.6	1	7591.63	6	11611.1	13	14861	2	7744.06	13	13933.8	2	13959.6	4	11481.8	1	20143.1	1	10489	3	14008.6	2	12987.8	2	13149.4	2	9740.73	17
		20593.1	1	17096.1	1	27340.4	1	24393.4	1	41140.2	1	18005.4	1	6373.46	40	26459.1	1			25093.9	1	19596.9	1	7763.27	6	11724.1	13	14890.7	2	7808.6	13	14203.5	2	14077.1	4	11531.7	1	20340.7	1	10589.6	3	14245.1	2	13194.5	2	13159.2	2	9849.05	17
		20700.2	1	17105	1	27899.9	1	24639.5	1	41572.2	1	18161	1	6500.42	39	26723.6	1			25316.8	1	19763.5	1	7799.34	6	11875.3	13	15006.3	2	7850.5	13	14316.8	2	14090.8	4	11575.3	1	20556.8	1	10762.2	2	14273.4	2	13327	2	13214.8	2	9962.52	17
		20839.9	1	17149.4	1	28054	1	25068.5	1	42018.3	1	18446.8	1	6517.9	37	27077.2	1			25574.4	1	19974.2	1	7899.04	6	12064.3	12	15135.2	2	7856.34	13	14526.9	2	14198.7	4	11586.1	1	20667.3	1	10908.8	2	14460.9	2	13430	2	13261.8	2	10190.5	16
		20964.6	1	17550.5	1	28372.9	1	25173.4	1	42581.9	1	18601.3	1	6616.69	37	27086.9	1			25769.1	1	20045.1	1	8038.66	5	12073.4	11	15354.6	2	7951.13	13	14728.5	2	14207.3	4	11613.4	1	20985.5	1	10909.5	2	14490.9	2	13621.7	2	13276.7	2	10282	16
		21062.6	1	17576.8	1	28553.2	1	25510.3	1	43152.6	1	18985	1	6628.67	37	27514.7	1			25946.5	1	20146.4	1	8067.43	5	12310.4	11	15375.8	2	8085.66	13	14807	2	14207.7	4	11653.8	1	21234.3	1	11039.6	2	14725.8	2	13647.6	2	13387.8	2	10508.6	14
		21245.3	1	17774.9	1	28702.2	1	25795.1	1	43703.9	1	19007.7	1	6721.45	37	27816.6	1			26199	1	20396.9	1	8252.98	5	12419.7	11	15561.4	2	8103.48	13	14886.5	2	14225	4	11714.2	1	21592	1	11132.5	2	14792	2	13811.7	2	13431.4	2	10699.5	13
		21248	1	17942.9	1	28837.7	1	25841.8	1	44265.2	1	19351.1	1	6806.83	35	28377.1	1			26516.5	1	20619.9	1	8307.13	5	12556.9	10	15771.9	2	8216.74	12	14964.6	2	14286	4	11853.4	1	21599.7	1	11133.7	2	14860.9	2	13966.6	2	13457.8	2	10804.1	13
		21670.6	1	18074.7	1	29169.1	1	26064.9	1	44785.5	1	19448.7	1	6882.56	34	28644.6	1			26761.9	1	20661.7	1	8515.56	5	12596.3	10	15838.6	2	8300.26	12	15225.5	2	14415.7	4	11877	1	21901.1	1	11297.5	2	15010.7	2	14054.1	2	13504	2	10890	13
		21743.9	1	18293.4	1	29503.7	1	26539.8	1	45215.5	1	19453	1	6927.37	34	28950.1	1			26957.6	1	20912.9	1	8550.99	4	12807.9	10	15986	2	8348.2	11	15295.6	2	14478.8	4	11879.4	1	21945.6	1	11379	2	15078.2	2	14217.7	2	13511.4	2	10930.7	13
		22017	1	18445.5	1	29504.9	1	26603	1	45717	1	19734.1	1	7020.41	34	29482.1	1			27168.6	1	21161.8	1	8733.35	4	12905.8	10	16279.6	2	8382.9	11	15558	2	14480.9	4	11995.4	1	22258.1	1	11438.3	2	15301.2	2	14228.2	2	13531.4	2	10995.1	13
		22268.7	1	18560.7	1	29757.7	1	27384.1	1	46023.3	1	19897.5	1	7027.51	34	29752.4	1			27390.2	1	21202.1	1	8780.02	4	13038.3	10	16361.6	2	8469.73	11	15592.4	2	14507	4	12011.5	1	22316	1	11501.2	2	15307	1	14372.7	2	13588.1	2	11038.8	12
		22269.5	1	18661	1	30051	1	27466	1	46400.5	1	20107.1	1	7088.1	33	29961.3	1			27687.7	1	21478.5	1	8988.97	3	13229.9	10	16549.5	2	8582.83	11	15745.8	2	14827.2	4	12073.4	1	22675.8	1	11568.2	2	15583.7	1	14556.7	2	13609.1	2	11089.5	12
		22475.1	1	18983	1	30094.8	1	27842.2	1	46764	1	20328.6	1	7165.9	33	30779.6	1			28006.2	1	21665.8	1	8994.26	2	13271.5	10	16712.1	2	8583.62	11	15863.4	2	14830.7	4	12124.3	1	22755.9	1	11589.1	2	15600.5	1	14619.1	2	13686.5	2	11150.6	11
		22740.9	1	19090.7	1	30376.1	1	28011.1	1	47202.9	1	20746.9	1	7198.81	33	30854.1	1			28319.1	1	21794.4	1	9157.26	2	13394.3	10	16926.9	1	8670.22	10	15904.9	2	14832.6	4	12133.3	1	22900.6	1	11647.9	2	15726.1	1	14723.9	2	13701.5	2	11213.3	11
		22859.5	1	19321.9	1	30700	1	28227.7	1	47649.9	1	21092	1	7237.48	33	31521.5	1			28600.3	1	22086.8	1	9239.05	2	13493.6	9	17026.5	1	8790.5	10	15978.8	2	15011.9	4	12195.2	1	23135.1	1	11670.5	2	15774.7	1	14763.5	2	13713.4	2	11311.7	10
		23183.1	1	19361.2	1	30788	1	28376.9	1			21236.7	1	7373.2	33	31807.9	1			28818.6	1	22272	1	9336.18	2	13726.5	9	17236.9	1	8934.42	10	16226	2	15044.5	4	12369.9	1	23204.5	1	11676.1	2	15792	1	14987.2	2	13751.6	2	11347.8	9
		23226	1	19563.8	1	31295.5	1	28647	1			21665.1	1	7405.72	29	32171.2	1			29110.9	1	22339.1	1	9411	2	13732.7	9	17277.9	1	8962.22	9	16316.7	2	15262.3	4	12423.8	1	23482.3	1	11738.1	2	15892.3	1	15002.2	2	13925.3	2	11384.1	9
		23498.9	1	19776.3	1	31364.4	1	28702	1			22041.7	1	7505.41	29	32633.3	1			29402.9	1	22468.1	1	9537.93	2	13918.7	9	17584.7	1	9069.35	9	16532.5	2	15327.3	4	12438.4	1	23660.1	1	11788.9	2	15972.4	1	15206.3	2	13951.8	2	11406.8	9
		23796.3	1	19948.2	1	31769.9	1	29183.7	1			22391.6	1	7516.5	28	33021.5	1			30248.5	1	22574	1	9568.68	2	13927.9	9	17628.3	1	9176.03	9	16801.7	2	15581.2	4	12525.1	1	23763.7	1	11804.4	2	16039.3	1	15261.7	2	13959.6	2	11460.5	9
		23896	1	19973.7	1	31833.7	1	29291.1	1			22797.1	1	7579.41	28	33364.8	1			30736.8	1	22679.6	1	9738.28	2	14191.7	9	17853.6	1	9204.47	8	16821.8	2	15643.4	4	12632.1	1	24054.5	1	11832.4	2	16233.3	1	15340.3	2	13991.4	2	11527.8	9
		24106.4	1	20299.6	1	32223.5	1	29605.7	1			23230.5	1	7685.39	28	33691.5	1			31183.6	1	22898.9	1	9745.49	2	14209	9	17978.1	1	9358.24	8	16910.6	2	15757.8	4	12658.5	1	24498.9	1	11864.7	2	16257	1	15359	2	14025.4	2	11589	9
		24415.7	1	20522.9	1	32507.1	1	29800	1			23619.1	1	7744.71	27	34628.9	1			31631.8	1	22956.2	1	9892.52	2	14381.9	9	18079.2	1	9452.63	7	17136.1	2	15953.4	4	12695.7	1	24505.4	1	11893.2	2	16525.4	1	15548.2	2	14052.6	2	11646.4	9
		24458	1	20566	1	32565.4	1	30404.3	1			24377.4	1	7850.82	27	34718.6	1			32006.5	1	23259	1	9950.36	2	14555.6	7	18375.1	1	9517.39	7	17168.6	2	16105.7	4	12707.1	1	24958.9	1	11966.9	2	16525.9	1	15619.2	2	14091	2	11654.2	9
		24654.7	1	20777.6	1	32914.2	1	30539.3	1			24624.6	1	7881.86	27	35568.5	1			32391.4	1	23417.8	1	10073.8	2	14633.6	7	18490.3	1	9606.66	7	17298.4	2	16216.3	4	12820.1	1	25059.2	1	12005	2	16782.4	1	15754.1	2	14095.8	2	11664.1	9
		24838.4	1	21109	1	33229.3	1	30820.6	1			25074.2	1	7954	26	35581.4	1					23549.1	1	10122.1	2	14769.9	7	18690.5	1	9665.7	7	17311.8	1	16428.5	4	12879.6	1	25366.1	1	12055.6	2	16827.1	1	15812.2	2	14164.7	2	11669.6	9
		24965.4	1	21129	1	33262.7	1	31110.4	1			25656.4	1	8044.1	25	36231.4	1					23785.7	1	10255.3	2	14839.6	7	18891.5	1	9686.87	7	17581.7	1	16510	4	12992.3	1	25421	1	12061.4	2	17073.1	1	15880	2	14180.8	2	11713.3	9
		25389.4	1	21191	1	33882.1	1	31272.3	1			26068.5	1	8067.27	24	36284.9	1					23867.2	1	10343.9	2	14995.8	7	18956.1	1	9856.59	7	17605.9	1	16698.1	4	13086	1	25642.7	1	12095	2	17088.5	1	16033.8	2	14208.3	2	12231	8
		25415.1	1	21379.9	1	33986.7	1	31678.3	1			26592.1	1	8137.55	24	37020	1					24149.2	1	10522	2	15134.5	7	19071.2	1	9961.73	7	17855.5	1	16817.8	4	13091.2	1	25998.7	1	12158.5	2	17356.7	1	16234.5	2	14244.8	2	12385.2	8
		25740.9	1	21554.6	1	34202.4	1	31982.3	1			27039.6	1	8224.64	24	37897.8	1					24334.1	1	10657.8	2	15258.9	7	19261.6	1	9988.51	7	17960.3	1	16967	4	13091.9	1	26264.1	1	12185	2	17397.8	1	16323.4	2	14265.4	2	12550.7	8
		25911.9	1	21605.9	1	34786.9	1	32119.8	1			27506.5	1	8244.78	24	38432.7	1					24447.8	1	10701.9	2	15454.8	7	19369.9	1	10151.7	7	18153.6	1	17061.3	4	13113.1	1	26456.1	1	12243.2	2	17584	1	16582.9	1	14270.5	2	12639.1	8
		26144.6	1	21721.2	1	35021.9	1	32317.9	1			27863.3	1	8384.15	23							24694.3	1	10731.1	2	15574.4	6	19531	1	10168.3	7	18348.4	1	17211.8	3	13190.4	1	26817.5	1	12260.9	2	17658.1	1	16676.1	1	14333.6	2	12739.1	8
		26395.6	1	21778.3	1	35318.8	1	32526.9	1			28323.6	1	8396.19	23							25001.3	1	10954.4	2	15652	6	19802.4	1	10346	6	18348.8	1	17375.7	3	13295.7	1	26864.2	1	12307.7	2	17814.3	1	16720.3	1	14360.7	2	12825.3	8
		26728.4	1	21793.4	1	35639.3	1	32572.6	1			28648.2	1	8468.79	21							25193.7	1	10971.1	2	15862.9	6	19824.7	1	10397.5	6	18591.1	1	17570.8	3	13444.8	1	27077.9	1	12383.4	2	17926.9	1	16810.8	1	14407.7	2	13089.1	8
		27017.3	1	21870.3	1	35707.9	1	32647.1	1			28784	1	8540.94	21							25471.4	1	11123.6	2	15937.3	6	20110.5	1	10514.9	6	18731	1	17678.8	2	13493.4	1	27329.2	1	12415.8	2	18085.7	1	16908.4	1	14416.7	2	13262.6	8
		27227.2	1	22091.7	1	36094.1	1	32792.3	1			28805.9	1	8585.01	20							25630.4	1	11175.4	2	16133	6	20136.5	1	10529.1	6	18779.2	1	17803	1	13496.5	1	27337.5	1	12470.1	2	18224.6	1	17092.9	1	14462.9	2	13346	8
		27605.2	1	22157.7	1	36183.3	1	33134	1			29026.5	1	8697.3	19							25722.6	1	11337.2	1	16205.5	6	20374.2	1	10539	6	19006	1	18004.9	1	13544.2	1	27710.3	1	12506	2	18359.4	1	17144	1	14477.3	2	13507.9	8
		27811.1	1	22324.3	1	36554.4	1	33229.8	1			29074.2	1	8712.33	18							25756	1	11383.9	1	16473.6	5	20610.5	1	10551.6	6	19034.9	1	18137.5	1	13570.5	1	27719	1	12577.5	2	18522	1	17334.8	1	14619	2	13614.5	8
		27987.6	1	22400.2	1	36739.8	1	33464.7	1			29354.9	1	8845.43	18							25913.4	1	11511.8	1	16503.9	4	20677	1	10641.3	6	19179.1	1	18192.3	1	13768.5	1	28084.1	1	12619.3	2	18631.1	1	17346.3	1	14645.2	2	13799.2	8
		28298.5	1	22510.2	1	37105.4	1	33694	1			29762.7	1	8896.25	17							26171.3	1	11519.9	1	16639.7	4	20962.6	1	10656.8	6	19285.9	1	18382.5	1	13773	1	28136.2	1	12719.5	2	18797.5	1	17445.9	1	14703.8	2	13934.6	8
		28525.4	1	22612.2	1	37229.9	1	34057	1			30214.9	1	9010.85	17							26472.5	1	11645.8	1	16798	4	21068.5	1	10677.3	6	19378.2	1	18464.5	1	13773.7	1	28397.6	1	12720.9	2	18801.8	1	17620	1	14737.4	2	14019.4	8
		28868.3	1	22906.2	1	37572.1	1	34206.7	1			30795.9	1	9153.32	17							26476.5	1	11746	1	16903.9	4	21242.7	1	10720	6	19443.1	1	18606	1	13800.1	1	28637.5	1	12901	1	19076.9	1	17681.5	1	14889.6	2	14094.2	7
		29012.5	1	22915.6	1	37958.3	1	34536.9	1			31341.3	1	9165.29	14							26806.5	1	11821.4	1	17100.5	4	21373.3	1	10750.9	6	19601	1	18691.2	1	13877.5	1	28696.9	1	12929.2	1	19150.2	1	17887.9	1	14967.1	2	14156.2	7
		29475	1	22927.8	1	38013.1	1	34884.7	1			32094.5	1	9274.28	14							26893.4	1	11991.5	1	17139.9	4	21384.1	1	10776.9	6	19644.4	1	18799.2	1	13886.8	1	29011.1	1	13057.6	1	19352.8	1	18005.7	1	14969.9	2	14221	7
		29615.3	1	23080.1	1	38447.8	1	34923	1			32587	1	9367.44	14							27147	1	12029.3	1	17243.7	4	21552.4	1	10813.1	6	19811.1	1	18827.9	1	13895.1	1	29080.4	1	13101.5	1	19420.3	1	18167.4	1	15029.2	2	14241.9	7
		29851.7	1	23370.3	1	38743.6	1	35194.1	1			33131.9	1	9407.25	14							27356	1	12257.4	1	17423.5	4	21852.1	1	10925.4	6	19838.1	1	19031.5	1	13991.3	1	29438.3	1	13258.6	1	19575.1	1	18186.4	1	15070.7	2	14284	7
		30047.6	1	23373.1	1	38973.3	1	35265.8	1			33469.5	1	9540.63	14							27528	1	12333.1	1	17465.9	4	22000.1	1	11026.8	5	19959.2	1	19049.1	1	14072	1	29444.1	1	13269.6	1	19656.7	1	18352.7	1	15195.2	2	14349.2	7
		30381.6	1	23411.8	1	39584.5	1	35457	1			34013.3	1	9587.58	14							27759.6	1	12487.2	1	17752.6	4	22044.9	1	11048.6	5	20058.2	1	19215	1	14090.1	1	29780.3	1	13557.4	1	19913.5	1	18394	1	15213.4	2	14399	7
		30634.5	1	23805.3	1	39666.2	1	35919.1	1			34359.1	1	9640.17	14							27818	1	12676.8	1	17851.9	4	22271.1	1	11178.9	5	20167.8	1	19319.7	1	14171.7	1	29904.9	1	13635	1	19952.8	1	18484.9	1	15295	2	14428.1	7
		30694.1	1	23951.1	1	40193.6	1	36187.2	1			34789.5	1	9678.5	13							28118.2	1	12708.4	1	18060.8	4	22482.3	1	11268	5	20382.7	1	19465.7	1	14216.6	1	30256.7	1	13803.6	1	20128.6	1	18661	1	15295.2	2	14488.2	7
		31128.5	1	24206	1	40316.5	1	36376.1	1			35427.2	1	9686.05	13							28286.5	1	12862.7	1	18101.8	4	22609.9	1	11285	5	20418.2	1	19528.4	1	14260.4	1	30333.6	1	13902	1	20252.8	1	18698	1	15444.7	2	14567.2	7
		31138.6	1	24274.5	1	40777.6	1	36683.8	1			36026.2	1	9723.65	13							28323.8	1	13017.3	1	18318.6	4	22836.8	1	11330.9	5	20744.5	1	19690.1	1	14267.7	1	30681.5	1	13995.5	1	20314.6	1	18806.2	1	15445	2	14605.1	7
		31571.1	1	24463.1	1	40845	1	36729.5	1			36383.1	1	9745.56	12							28452.8	1	13054.8	1	18525.5	4	23036.9	1	11344.4	5	20812.2	1	19717	1	14408.5	1	30758.8	1	14059.3	1	20529.8	1	18814.3	1	15525	2	14760.5	7
		31891.9	1	24893.2	1	41273.6	1	37123.9	1			36808.3	1	9750.64	12							28518.8	1	13290.1	1	18544.8	4	23051.7	1	11430.7	5	21093.7	1	19888.4	1	14413	1	30906	1	14131.8	1	20612.3	1	19003.4	1	15650.2	2	15023.7	7
		32435.1	1	24907.9	1	41519.7	1	37322.6	1			37494	1	9777.12	12							28684.3	1	13295.6	1	18764.4	4	23333.7	1	11437.4	5	21149.8	1	19934	1	14482.3	1	31163.5	1	14223.7	1	20819.1	1	19038.8	1	15687.3	2	15277.1	7
		32594.6	1	25491.6	1	41723.2	1	37793.5	1			38165.8	1	9787.94	12							28767.1	1	13376.3	1	18785	4	23348.6	1	11560.5	5	21305.8	1	19961.7	1	14596	1	31201.9	1	14345.5	1	20854.1	1	19177.7	1	15761.2	2	15464.3	7
		32853.9	1	25568.1	1	42034	1	37809.3	1			38748	1	9803.16	12							28822.6	1	13436.9	1	18998.6	4	23648.4	1	11567.4	5	21427.4	1	20220.2	1	14622.3	1	31433.6	1	14469.7	1	21052.5	1	19306.7	1	15813.5	2	15514.5	7
		32913.6	1	25763.2	1	42307.6	1	38113.5	1			39295.8	1	9815.97	11							28857.8	1	13519.5	1	19115.2	4	23649.6	1	11750.4	5	21458.7	1	20250.7	1	14729.1	1	31553.1	1	14476.8	1	21099.5	1	19405	1	15844.5	2	15523.9	7
		33203.8	1	25955	1	42477.3	1	38177	1			39828.9	1	9832.02	11							29031.5	1	13564.1	1	19258.4	4	23863.9	1	11787.2	5	21727.4	1	20377.6	1	14741.4	1	31702.7	1	14564.2	1	21332.8	1	19637.9	1	16002.1	2	16148.7	7
		33256.2	1	25984.8	1	42709.4	1	38584.5	1			40184.6	1	9843.02	10							29044.9	1	13757.5	1	19432.9	4	24039.6	1	11883.7	5	21905.2	1	20634.8	1	14768.7	1	31888.8	1	14721.3	1	21342.3	1	19647	1	16038.2	2	16503.7	7
		33707.5	1	26221.2	1	43099.4	1	38684.2	1			40596.7	1	9859.34	10							29107.4	1	13797.8	1	19675.6	4	24106.1	1	11954.8	5	22012.1	1	20668.4	1	14775.7	1	32186.2	1	14775.4	1	21601.5	1	19921.1	1	16056.8	2	16728.7	7
		33996.1	1	26553.5	1	43215.1	1	38987.5	1			41179.5	1	9889.96	10							29129.7	1	14045.5	1	19762.1	4	24391.3	1	12027.5	5	22161.8	1	20719.3	1	14815.5	1	32289.8	1	14873.8	1	21687.2	1	19999.9	1	16155.5	2	16876.6	7
		34171.2	1	26574.4	1	43538.6	1	39390.9	1			41836.6	1	9911.13	10							29164	1	14080.2	1	19929.2	4	24397.9	1	12176.4	5	22241.9	1	20941.9	1	14985	1	32576.1	1	14909.8	1	21885.9	1	20225.6	1	16297.7	2	17020.3	7
		34324.1	1	26617.4	1	43965.1	1	39471.3	1			42367.6	1	9941.22	10							29201.9	1	14156.3	1	20040	4	24667.8	1	12345.8	5	22467	1	20983.5	1	15045.5	1	32673.1	1	14997	1	22017.7	1	20237.9	1	16320.4	2	17198.9	7
		34393.4	1	26973	1	44058.2	1	39868.4	1			42708.1	1	9991.69	10							29220.4	1	14370.1	1	20236.6	4	24881.4	1	12402	5	22518.4	1	21098.7	1	15050.7	1	32907.9	1	15091.6	1	22066.7	1	20584.4	1	16343	2	17368.1	7
		34661.6	1	27105.9	1	44654.8	1	40289.6	1			43120.6	1	10015.7	10							29220.9	1	14384.5	1	20366	4	24923.5	1	12509.3	5	22780.8	1	21188.7	1	15050.8	1	32962.1	1	15097.6	1	22289.4	1	20653.7	1	16425.7	2	17561	7
		34739.2	1	27190	1	44778.8	1	40868.7	1			43458.8	1	10043.1	10							29259.9	1	14531.4	1	20480.1	4	25182.8	1	12636.7	5	22795.9	1	21318.6	1	15078.3	1	33268.4	1	15161.1	1	22433.2	1	20948.2	1	16486.1	2	17755.6	7
		35078.8	1	27416.9	1	45222.4	1	41623.2	1			43811.4	1	10062	10							29260.3	1	14596.2	1	20678.6	3	25251.2	1	12757.3	5	22972.7	1	21527.8	1	15121.8	1	33335.4	1	15257.1	1	22494.2	1	21005.7	1	16659.2	2	17918.4	7
		35210.2	1	27770	1	45608.9	1	42168.9	1			44069.1	1	10123.6	10							29284.5	1	14608	1	20708.8	3	25565.2	1	12762.4	5	23073.4	1	21615.5	1	15250.3	1	33581.3	1	15264.7	1	22759.1	1	21027.2	1	16784.9	2	18049.3	7
		35500	1	27866.6	1	45685.6	1	42655.4	1			44537.8	1	10206.6	10							29328.2	1	14621.8	1	20969.4	3	25581.5	1	12930.5	5	23223.7	1	21669.3	1	15258.5	1	33827.9	1	15405.7	1	22789.8	1	21219.7	1	16880.1	2	18090.6	7
		35727.4	1	28177.4	1	46165.8	1	43380.7	1			45001.6	1	10236.2	10							29369.7	1	14627.2	1	21041.3	2	25602.7	1	13059.3	5	23370.4	1	21779.6	1	15347.9	1	33870.9	1	15516.6	1	23090.8	1	21347.9	1	16909.3	2	18207.9	7
		35849.4	1	28563.6	1	46719.7	1	43793.6	1			45651.6	1	10267.6	10							29408	1	14884.4	1	21273	2	25773.9	1	13086.9	5	23394.4	1	21989.3	1	15420.1	1	34111.7	1	15547.1	1	23179.3	1	21410.1	1	16991.8	2	18358.7	6
		35960.8	1	28712.5	1	47252.2	1	44328.6	1			46238.8	1	10345.5	10							29416.8	1	14906.4	1	21352.2	2	25903.3	1	13153.3	5	23591.9	1	22006.7	1	15497.1	1	34415.4	1	15617	1	23355.2	1	21567.3	1	17083.4	2	18442.6	6
		36184.4	1	28727	1	48000	1	44703.6	1			46829.4	1	10387	10							29439.4	1	14987.1	1	21410.6	2	26118.7	1	13256.9	5	23772.3	1	22085.8	1	15633.2	1	34556.5	1	15725.7	1	23510.5	1	21575.9	1	17244.1	2	18517.2	6
		36265.8	1	29201.1	1	48551.6	1	45033.3	1			47124.4	1	10480.4	10							29487.4	1	15137.8	1	21561.6	2	26225.3	1	13398.4	5	23809.2	1	22278.7	1	15648.3	1	34771.3	1	15779.5	1	23614.4	1	21587	1	17255.2	2	18585.2	6
		36281	1	29354	1	49250	1	45608.2	1			47475	1	10494.6	10							29510.4	1	15226.8	1	21756.8	2	26459.5	1	13410.8	5	23962.2	1	22450.2	1	15665.7	1	35099.1	1	15889.6	1	23749.6	1	21605.1	1	17324.8	2	18657.6	6
		36463.5	1	29446.9	1	49967.9	1	45959.6	1			47591.3	1	10602.6	10							29511.7	1	15369.4	1	21784.8	2	26499.9	1	13575.1	5	24054.2	1	22521.9	1	15849.1	1	35140.7	1	15906.6	1	23817.2	1	21794.3	1	17364.4	2	18749.8	6
		36491	1	29690.9	1	50175.6	1	46438.4	1			47820.6	1	10611.7	10							29524.4	1	15421.5	1	21836.4	2	26630.3	1	13670	5	24117.2	1	22544.8	1	15853.1	1	35401	1	15922.5	1	23935.1	1	21804	1	17533.9	2	18890.8	6
		36620.9	1	30023	1	50768.9	1	47021.2	1			48112.9	1	10613.1	10							29531.3	1	15630.1	1	21895.2	2	26791.6	1	13744.1	5	24309.6	1	22806.4	1	15872.2	1	35622.4	1	15951.9	1	24072.7	1	21878.7	1	17575	2	19025.9	6
		36665.3	1	30321.9	1	51149.5	1	47512	1			48262.6	1	10736.5	9							29551.5	1	15674	1	22018.1	2	26970.6	1	13756.6	5	24502.3	1	22817.6	1	15979	1	35880	1	15960	1	24165.8	1	22003.8	1	17643.2	1	19211.7	5
		36944.1	1	30491.5	1	51707.9	1	47789.5	1			48484	1	10758.8	9							29596.4	1	15858.7	1	22192.7	2	27078.1	1	13832.4	5	24617.4	1	22984.9	1	16013.5	1	36234.6	1	15964.8	1	24223.7	1	22175.7	1	17651.7	1	19269.4	5
		37112.1	1	30553.3	1	52080.7	1	48079.5	1			48737.3	1	10759.9	9							29603	1	15908	1	22277.7	2	27247.9	1	13893.3	5	24689.9	1	23124.9	1	16044.9	1	36373.1	1	16017.9	1	24434.5	1	22255.2	1	17670.8	1	19452.5	5
		37134.6	1	30794.9	1	52607.8	1	49089.7	1			48820.1	1	10908.2	9							29626.5	1	16051.4	1	22355.2	2	27378.8	1	13903.4	4	24852.4	1	23134.2	1	16071.8	1	36729.9	1	16042.7	1	24447.3	1	22404.7	1	17861.9	1	19662.2	5
		37195.5	1	31081.7	1	53350.5	1	49715.7	1			49056.1	1	10926.3	9							29779.9	1	16124.6	1	22501.6	2	27579	1	14045	4	24870.5	1	23340.1	1	16133.4	1	36913.8	1	16043	1	24739.5	1	22458.4	1	17892.5	1	19733.7	5
		37201.4	1	31411.2	1	54009.1	1	50290	1			49285.9	1	10993	9							29807.3	1	16199.9	1	22509.2	2	27681.7	1	14121.5	4	25139.9	1	23393.1	1	16188.6	1	37120.6	1	16107.8	1	24753.2	1	22599.3	1	17930.1	1	19805.4	5
		37208.5	1	31520.8	1	54683.1	1	50924	1			49844.6	1	11089	9							29821.1	1	16359.1	1	22737.4	2	27797.6	1	14214.7	4	25164.6	1	23476.2	1	16311.2	1	37385.8	1	16132.8	1	24986.4	1	22651.9	1	17965.3	1	19886.9	5
		37222.5	1	31682.7	1	55385.5	1	51382.9	1			50261.2	1	11136.9	9							29872.4	1	16392.3	1	22774.7	2	27995.2	1	14284	4	25427.5	1	23597.3	1	16395.6	1	37504.7	1	16140.9	1	25078.5	1	22802.2	1	18118.8	1	19980.3	4
		37223.7	1	31716.8	1	56049	1	51856.4	1			50687.8	1	11160.9	9							29932.4	1	16612.7	1	22867.2	2	28015.2	1	14338.1	4	25481.2	1	23689.7	1	16431.7	1	37873.3	1	16159.2	1	25225.3	1	22899.9	1	18125	1	20207	3
		37338.4	1	32018.1	1	56442.3	1	52224.4	1			51361.5	1	11216.5	9							29945.9	1	16618.9	1	22940.2	2	28214.3	1	14396.5	4	25730.4	1	23764.1	1	16442.5	1	38083.5	1	16186.8	1	25299.6	1	22944.5	1	18180.5	1	20279.8	3
		37374	1	32243.9	1			52636.8	1			51758.4	1	11346.1	9							29946.8	1	16819.1	1	23081.7	2	28287.3	1	14457.3	4	25741.6	1	23824.4	1	16522.9	1	38231.5	1	16218.8	1	25407.1	1	22950	1	18282.5	1	20356.2	3
		37455.4	1	32278.9	1			53281.9	1			52060.9	1	11379	9							29953.9	1	16897.9	1	23247.3	2	28438.9	1	14483.6	4	25923.8	1	23848	1	16554.8	1	38599.1	1	16226.9	1	25618.3	1	23083.6	1	18298.8	1	20463	3
		37457.4	1	32422	1							52346	1	11395	8							29972.1	1	17044.3	1	23414.6	2	28627.3	1	14573.6	4	25949.2	1	24091.2	1	16738.1	1	38663.5	1	16232.2	1	25638.8	1	23205.1	1	18424.1	1	20628.4	3
		37464.5	1	32746.8	1							52613	1	11464.5	7							29972.3	1	17155.9	1	23480.6	1	28630.2	1	14622.7	4	26162	1	24091.2	1	16740.2	1	38989.7	1	16242	1	25742.9	1	23220.9	1	18454.3	1	20702.8	3
		37777	1	32759.8	1							52866.9	1	11474.3	7							29974.4	1	17286.3	1	23641.4	1	28807.5	1	14660.3	4	26173.8	1	24230.7	1	16759.8	1	39049.1	1	16245.2	1	25902.1	1	23426.2	1	18497.9	1	20742.1	3
		37859.9	1	32888.3	1							53064.3	1	11531.9	7							29990.9	1	17323.2	1	23689.1	1	28904.8	1	14744.1	4	26360.7	1	24304	1	16938.3	1	39318	1	16252.9	1	26073.6	1	23468.5	1	18558	1	20801	3
		38189.5	1	33000.2	1							53208.4	1	11568.2	7							29995.4	1	17437.8	1	23902.1	1	29060.9	1	14752.5	4	26366.7	1	24460	1	16965.9	1	39334.1	1	16253.2	1	26268.6	1	23627.5	1	18674.8	1	20868.2	3
		38448	1	33017.9	1							53723.1	1	11585.4	7							30042	1	17589.9	1	24054.1	1	29146	1	14857.1	4	26605.1	1	24505.3	1	16973.9	1	39640.3	1	16267.8	1	26292.7	1	23628.6	1	18690.9	1	20968.2	3
		38818.7	1	33050.1	1							54236.7	1	11602.9	5							30062	1	17606.5	1	24282.1	1	29314.5	1	14859.6	4	26697.4	1	24543	1	16982.5	1	39758.9	1	16288	1	26514.9	1	23670.6	1	18897.4	1	21081.5	3
		38897.1	1	33085.9	1							54533.5	1	11651.4	5							30071.1	1	17746.6	1	24326.6	1	29347.5	1	14904	4	26841.8	1	24745.6	1	17054.9	1	39953.9	1	16326.7	1	26656.9	1	23753.6	1	18910.2	1	21235.5	3
		39200.3	1	33112.5	1							54890.3	1	11701.7	4							30077	1	17762.1	1	24596.8	1	29527	1	15036.3	4	26926.9	1	24849.7	1	17247.8	1	40120.4	1	16334.8	1	26943.8	1	23887.2	1	18940.1	1	21312.2	3
		39229.6	1	33363.1	1							55308.8	1	11742.5	4							30093.4	1	17862.6	1	24614.7	1	29648.6	1	15037	4	26983.3	1	24859	1	17272.2	1	40275.7	1	16356.1	1	26980.2	1	24018.4	1	19073.5	1	21385.8	3
		39454.6	1	33408	1							55622.2	1	11754.9	4							30104.8	1	17918.3	1	24794.8	1	29779.6	1	15180.9	4	27154.9	1	24949.6	1	17282.2	1	40506.4	1	16368.6	1	27220.9	1	24023.3	1	19111.2	1	21511.9	3
		39495	1	33562.6	1							56148	1	11827.9	3							30116.6	1	18029.7	1	24930.1	1	29908.8	1	15211.5	4	27163	1	25098.3	1	17376.7	1	40839.7	1	16392.9	1	27232.5	1	24187.2	1	19251.8	1	21687.2	3
		39845.7	1	33664.4	1							56180.2	1	11850.2	3							30137	1	18092.6	1	25008.5	1	30162.2	1	15269	4	27164	1	25150	1	17554.5	1	40927.1	1	16398.9	1	27436.1	1	24272.3	1	19285.2	1	21875.8	3
		39914.6	1	33778.6	1							56622.7	1	11913.8	3							30205.5	1	18338.7	1	25059.8	1	30183.9	1	15301.4	4	27255.5	1	25205.4	1	17559.8	1	41049.9	1	16430.4	1	27494.7	1	24374.6	1	19392.6	1	22079.9	3
		40177.6	1	33790.1	1							56630.3	1	11935.6	3							30236.4	1	18410.1	1	25310.4	1	30421.4	1	15407.5	4	27286.4	1	25414.1	1	17569.4	1	41367.8	1	16444.1	1	27679.2	1	24512.8	1	19405.6	1	22274.4	3
		40375.7	1	33873.1	1							56894.2	1	11940	3							30264.5	1	18528.2	1	25331.5	1	30525.4	1	15468.1	4	27303.6	1	25464.1	1	17639.5	1	41379.9	1	16511.1	1	27768.1	1	24576.9	1	19439.2	1	22458.5	3
		40559.9	1	34047.6	1							57192.2	1	12015.4	2							30290	1	18584.2	1	25471	1	30604.8	1	15562.9	4	27355.8	1	25692	1	17693.8	1	41748.3	1	16517.8	1	28000.9	1	24633.1	1	19492.9	1	22823.6	3
		40719.2	1	34144.6	1							57531.9	1	12047.4	2							30335.3	1	18660.5	1	25594	1	30862.9	1	15575.2	4	27478.8	1	25695	1	17890.5	1	41806.1	1	16536.3	1	28091.9	1	24768.9	1	19569	1	23058.7	3
		41165.6	1	34377.5	1							57933.1	1	12053.4	2							30458.4	1	18772.4	1	25672.9	1	30976	1	15687	4	27487.4	1	25747.5	1	17905.2	1	42115.6	1	16540.1	1	28177.6	1	24777.2	1	19588.7	1	23293.4	3
		41237.5	1	34484.3	1							58512.7	1	12136.9	1							30706.2	1	18969.5	1	25772.6	1	31119.6	1	15784	4	27608.2	1	25978.8	1	17918.7	1	42361.5	1	16548.3	1	28388.9	1	24916	1	19747.7	1	23463.7	3
		41639.1	1	34500.5	1							59054.2	1	12162.6	1							30910.3	1	19020.6	1	25919.9	1	31320	1	15912.2	4	27625.7	1	26130	1	17935.1	1	42407.6	1	16605.5	1	28530.3	1	24957.2	1	19774.7	1	23623.9	3
		41806.9	1	34742.3	1							59501.7	1	12198.3	1							31090.5	1	19154.9	1	26166.3	1	31340.2	1	15986.8	4	27750.1	1	26148.8	1	18096	1	42909.5	1	16606.2	1	28641.2	1	25099.7	1	19800.1	1	23727	3
		42115.5	1	34796.9	1							59872.6	1	12268.4	1							31214.5	1	19270	1	26170.1	1	31545	1	16080.6	4	27790.5	1	26268.9	1	18121.3	1	42922.3	1	16644.5	1	28838.1	1	25191.2	1	19954.4	1	23832.4	3
		42481.1	1	34918.1	1							60312.9	1	12276	1							31235	1	19481.5	1	26411.7	1	31767.2	1	16255.8	4	27977.2	1	26337.1	1	18228.6	1	43344.2	1	16676.4	1	28877.8	1	25317.3	1	20046.6	1	23965.4	3
		42504.9	1	35010	1									12323.9	1							31529.2	1	19515.9	1	26506.4	1	31800.8	1	16301	4	28030.6	1	26447.5	1	18229.3	1	43525.5	1	16727.9	1	29098.3	1	25461.5	1	20104.7	1	24046.9	3
		42733.2	1	35039.5	1									12398	1							31792	1	19624.8	1	26741	1	32191.8	1	16387.3	4	28157.4	1	26491.2	1	18313.7	1	43719.8	1	16734	1	29156.1	1	25688.3	1	20253.3	1	24248.2	3
		43043.9	1	35064.6	1									12412.2	1							31979.9	1	19654.6	1	26796.7	1	32197	1	16501.7	4	28342.5	1	26547.3	1	18349.4	1	44038.5	1	16737.1	1	29370.4	1	25714	1	20270.7	1	24355.8	3
		43101.6	1	35091.9	1									12425.9	1							32086.5	1	19852.8	1	26993.4	1	32558.2	1	16512.6	4	28355.7	1	26686.5	1	18419	1	44040.9	1	16760.6	1	29441.9	1	25846.8	1	20383.5	1	24401.6	3
		43324.8	1	35152.5	1									12496.1	1							32163.6	1	20045	1	27152.4	1	32560.4	1	16632.1	4	28542.9	1	26778.9	1	18532.7	1	44334	1	16765.5	1	29567.1	1	25948.1	1	20461.9	1	24448.9	2
		43578.3	1	35171.5	1									12568.7	1							32167.9	1	20135.1	1	27164.7	1	32914.7	1	16665.9	3	28625.4	1	26815.8	1	18649.7	1	44334.7	1	16790.3	1	29656.2	1	26118.8	1	20536.2	1	24504.5	2
		43659.4	1	35189.6	1									12568.9	1							32213.3	1	20156.6	1	27343.2	1	32917.9	1	16700.9	3	28734.6	1	26936.2	1	18662	1	44625.3	1	16794.2	1	29850.3	1	26178.2	1	20559.7	1	24653.4	2
		44162.1	1	35276.4	1									12601	1							32306.9	1	20197.6	1	27444.3	1	33094.1	1	16820	3	28920.2	1	26969	1	18735.6	1	45003.5	1	16803.4	1	29929.9	1	26287.6	1	20606.2	1	24745.3	2
		45000	1	35445.7	1									12659.3	1							32460.8	1	20283.7	1	27609	1	33323.4	1	16833.3	3	28935.2	1	27007.8	1	18788.8	1	45120.7	1	16809.8	1	30167.9	1	26421.3	1	20705.2	1	24817.9	2
		45627.1	1	35494.6	1									12712.5	1							32505	1	20373.3	1	27620.4	1	33346	1	16932.9	3	29103.7	1	27129.8	1	18844.8	1	45459.2	1	16840.7	1	30245.3	1	26567.8	1	20874.6	1	24871.5	2
		46050.7	1	35639.6	1									12742.9	1							32535.4	1	20424.2	1	27932.3	1	33582.4	1	17074.1	3	29162.6	1	27184.6	1	18908.8	1	45949.2	1	16853.1	1	30480.5	1	26773.1	1	21002.9	1	24990	2
				35656.3	1									12794.4	1							32542.1	1	20481.4	1	27954.5	1	33853.6	1	17086.7	3	29286	1	27269	1	18967.3	1	46076.3	1	16876.4	1	30531.7	1	26852.3	1	21047.5	1	25100.8	1
				35737.8	1									12853.5	1							32576.6	1	20511.4	1	28191.6	1	33904.7	1	17270.5	3	29356.9	1	27450.1	1	18993	1	46418.2	1	16885.9	1	30625.7	1	27037.8	1	21114.3	1	25315.2	1
				35798.9	1									12869.7	1							32612.8	1	20577	1	28228.1	1	34137.2	1	17272.8	3	29579.9	1	27457.2	1	19138.8	1	46723.7	1	16927.7	1	30858.5	1	27121.2	1	21192.7	1	25484.1	1
				36092.5	1									12875.1	1							32854.3	1	20692	1	28500.8	1	34245.3	1	17348.6	3	29699.2	1	27485.2	1	19200.8	1	46804.6	1	16936.2	1	30907.7	1	27354.9	1	21225.2	1	25633.5	1
				36142.8	1									12982.2	1							32921.7	1	20702.1	1	28537.6	1	34392.4	1	17360	3	29714.3	1	27653.5	1	19343.3	1	47116.4	1	16950.2	1	31151.4	1	27371.4	1	21397.2	1	25734.3	1
				36225.1	1									13011.5	1							33085.5	1	20842.1	1	28632.5	1	34589.8	1	17441.9	3	29765.8	1	27717.1	1	19354.8	1	47257.4	1	16961.5	1	31213	1	27479	1	21433.9	1	25972.4	1
				36241.4	1									13038.6	1							33474.7	1	20891.5	1	28782.1	1	34717.1	1	17499.1	3	29785	1	27876.3	1	19382.2	1	47564.8	1	17004.5	1	31413.9	1	27660.4	1	21585.7	1	26093.6	1
				36322.1	1									13062.7	1							33567	1	20900.6	1	28797.1	1	34948	1	17530.5	3	29792.3	1	27912	1	19386.5	1	47605.2	1	17029.7	1	31529.5	1	27677.1	1	21628.9	1	26200.3	1
				36451.8	1									13154.7	1							33683.3	1	20931.8	1	28966.4	1	35053	1	17606.7	3	29858.3	1	28009.3	1	19681.5	1	47998.9	1	17030.5	1	31681	1	27895.7	1	21655.1	1	26366.3	1
				36591.8	1									13159.6	1							34601.6	1	21081.7	1	29035	1	35085.4	1	17623.5	3	29867.8	1	28092.1	1	19691.7	1	48004.6	1	17036.1	1	31740.5	1	27983.2	1	21925.5	1	26436.7	1
				36668.7	1									13232.6	1							34720.1	1	21135.3	1	29200.5	1	35304.2	1	17733.4	3	29876.1	1	28099	1	19700	1	48329.6	1	17043.4	1	31927.6	1	28054.5	1	22058.6	1	26515.8	1
				36870.4	1									13272	1							35313.4	1	21258.3	1	29330.3	1	35542.5	1	17813.3	3	29912.1	1	28270.3	1	19927.7	1	48453.8	1	17082.6	1	32021.1	1	28283.9	1	22103	1	26559.8	1
				37134.6	1									13288	1							35353.4	1	21427.6	1	29479.4	1	35575.6	1	17859.9	3	30133.8	1	28319.2	1	19992.3	1	48733.6	1	17101.4	1	32146	1	28289.6	1	22131.4	1	26638.7	1
				37273.7	1									13336.8	1							35543.3	1	21428.7	1	29580.3	1	35813.7	1	17961.9	3	30252	1	28476.2	1	20050.2	1	48788.3	1	17105.6	1	32403.7	1	28559.4	1	22292.3	1	26821.7	1
				37466.8	1									13371.7	1							35786.3	1	21500.8	1	29715	1	35827.2	1	17985.5	3	30265.4	1	28569.5	1	20103.5	1	49053.4	1	17133.4	1	32524.4	1	28633.2	1	22302.8	1	26901.9	1
				37538.8	1									13410.6	1							35962.5	1	21646.9	1	30060.1	1	36027.4	1	18096.6	2	30341.8	1	28599.4	1	20288.3	1	49384.2	1	17133.6	1	32775.4	1	28851.9	1	22380.8	1	27057.1	1
				37609.7	1									13440.9	1							35998.8	1	21678.8	1	30139.4	1	36102	1	18166.1	2	30553.1	1	28791.3	1	20294.7	1	49390.2	1	17134.8	1	32895.6	1	29053.9	1	22461.2	1	27170.6	1
				37689.6	1									13469.3	1							36015.9	1	21769.9	1	30352	1	36382	1	18173.7	2	30691.1	1	28795.7	1	20365.4	1	49714	1	17138.9	1	33242.2	1	29105.9	1	22601.2	1	27218.6	1
				37819.4	1									13507.7	1							36180	1	21869.3	1	30473.1	1	36411.2	1	18267.5	2	30722.7	1	28950.4	1	20468.1	1	49864.3	1	17149.8	1	33314.7	1	29324.7	1	22619.6	1	27270	1
				38016.1	1									13534.3	1							36352.1	1	21955.8	1	30559.9	1	36585.3	1	18398.1	2	30732.4	1	29101.5	1	20833.8	1	50056.6	1	17215.7	1	33622.7	1	29418.1	1	22739.1	1	27394.1	1
				38174.1	1									13609.3	1							36421	1	22005.6	1	30666.1	1	36873.3	1	18430.5	2	30866.6	1	29110	1	20855.3	1	50283.5	1	17255.4	1	33631.1	1	29636.3	1	22836.6	1	27445.9	1
				38204.5	1									13620.7	1							36561.7	1	22113.5	1	30677.9	1	36898.4	1	18549.3	2	30931	1	29286.5	1	20898.8	1	50397.4	1	17256	1	33827.4	1	29638.5	1	22905.4	1	27525.1	1
				38710.1	1									13629.3	1							36777.8	1	22120.2	1	30931.9	1	37125.3	1	18651.4	2	30996.9	1	29366.8	1	20920.1	1	50803.9	1	17280.2	1	33947.8	1	29918.5	1	22951.9	1	27606.5	1
				38899.8	1									13725.2	1							36843.6	1	22300.8	1	30988	1	37301.1	1	18676.5	2	31098.9	1	29498.6	1	20967.5	1	50836.8	1	17285.8	1	34172.1	1	29939.3	1	23067.8	1	27682.9	1
				38931.3	1									13740.1	1							36982.9	1	22305.2	1	31128.9	1	37310.3	1	18802.4	2	31189.8	1	29556	1	21126	1	51144.3	1	17309.6	1	34190	1	30226.9	1	23125.4	1	27751.3	1
				39057.6	1									13780.4	1							37229.6	1	22466.7	1	31425.9	1	37478.9	1	18812.4	2	31195.5	1	29723.9	1	21187.4	1	51533.4	1	17365.3	1	34445.6	1	30292.6	1	23425.8	1	27855.8	1
				39260.5	1									13817.6	1							37358.2	1	22494	1	31618.7	1	37652.6	1	18957.5	2	31255.1	1	29777.9	1	21329.2	1	52015.5	1	17418.2	1	34550.2	1	30556.9	1	23429.7	1	27959.2	1
				39441.2	1									13862.5	1							37638.8	1	22620.6	1	31758.4	1	37734.4	1	18973.7	2	31374.6	1	29791.2	1	21497.5	1	52466.2	1	17432.1	1	34691.8	1	30669.7	1	23635.7	1	28058.7	1
				39606.7	1									13913.6	1							37771.7	1	22623.1	1	31947.7	1	38027.3	1	19069.4	2	31429.3	1	30014.9	1	21514.3	1	52957.9	1	17446	1	34918.7	1	30749.4	1	23663.7	1	28188.7	1
				39671.6	1									13921.4	1							37893.1	1	22740.3	1	32160.3	1	38058.3	1	19123.1	2	31473.6	1	30191.7	1	21718.7	1	53205.8	1	17449.6	1	34989.7	1	30866.3	1	23934.1	1	28464.8	1
				39684.3	1									13998.8	1							38078	1	22827.7	1	32324.6	1	38348	1	19165	2	31572	1	30244.8	1	21789.7	1	53484.2	1	17459.1	1	35221.4	1	30916.7	1	24071.5	1	28610.9	1
				40114.9	1									14058.5	1							38168.6	1	22891.5	1	32562.9	1	38535.2	1	19260.8	2	31607	1	30279.3	1	21835.2	1	53852.2	1	17460.2	1	35321.8	1	31020.3	1	24221	1	28692.6	1
				40328.5	1									14078.1	1							38287.6	1	22980.8	1	32820.3	1	38757.3	1	19273.6	2	31665.1	1	30449.6	1	21872.9	1	54425.6	1	17467.8	1	35459.5	1	31162.6	1	24401.4	1	28745.3	1
				40344.3	1									14141.7	1							38334.7	1	23037.1	1			38941.6	1	19402.4	2	31794.8	1	30557.9	1	21949.8	1	55080.9	1	17530.2	1	35707.1	1	31174.6	1	24486.2	1	28856.7	1
				40405.6	1									14145.7	1							38354.6	1	23180.9	1			39039.4	1	19445.9	2	31809.1	1	30809.3	1	22000.6	1	55214.2	1	17559.6	1	35727.8	1	31217.3	1	24561.1	1	28930.4	1
				40728.5	1									14227.6	1							38585.4	1	23232.2	1			39265.4	1	19452.9	2	31861	1	30820.6	1	22117.7	1	55296.9	1	17605.7	1	35979.9	1	31336.5	1	24647.7	1	29046.8	1
				40924.2	1									14235	1							38719.4	1	23350.3	1			39393.5	1	19554.9	2	31910	1	30877.7	1	22234.9	1	55408.9	1	17631.7	1	36125.1	1	31368.8	1	24660.5	1	29149.6	1
				40995.3	1									14240.3	1							38748.1	1	23457.4	1			39399.2	1	19564.8	2	31910.6	1	31061.9	1	22269.5	1	55594.3	1	17634.8	1	36251.4	1	31542.6	1	24671.5	1	29206	1
				41292.3	1									14329.2	1							38993	1	23509.5	1			39563.7	1	19652.5	2	31952.5	1	31153.1	1	22273.1	1	55599.7	1	17688.2	1	36327.2	1	31601.6	1	24678.5	1	29282.8	1
				41320.4	1									14350.5	1							39135.9	1	23657.6	1			39685	1	19786.9	2	31989.1	1	31288.1	1	22326.5	1			17734.5	1	36525	1	31636.6	1	24759.4	1	29342.7	1
				41532.3	1									14407.1	1							39257.3	1	23734.5	1			39826.8	1	19796.9	2	31998.7	1	31371.9	1	22559.2	1			17734.9	1	36643.4	1	31723.4	1	24811	1	29406.1	1
				41739.5	1									14494	1							39619.1	1	23833.6	1			39830.2	1	19910.4	2	32021.1	1	31425.5	1	22650.5	1			17745.2	1	36803.1	1	31796.1	1	24812.6	1	29461	1
				41756.7	1									14500.5	1							39622.1	1	23990.8	1			40026	1	19948.2	2	32071	1	31474	1	22681.7	1			17770.6	1	37061.1	1	31913.1	1	25134.1	1	29541.8	1
				42109.8	1									14513.2	1							39845.1	1	24012.7	1			40178	1	20033.3	2	32243.7	1	31563.4	1	22722	1			17797.3	1	37071.2	1	31923	1	25202.7	1	29665.7	1
				42152.7	1									14614	1							39984.8	1	24109.4	1			40242.2	1	20154.4	2	32267.5	1	31721.7	1	22741.5	1			17808.2	1	37319.1	1	32062.1	1	25325.2	1	29760.5	1
				42318.2	1									14639.1	1							40209.1	1	24136.2	1			40381.6	1	20242.1	2	32433	1	31732.6	1	22919.1	1			17898.8	1	37403.8	1	32128.5	1	25407	1	29851.8	1
				42445.6	1									14715.4	1							40280.5	1	24230.7	1			40635.2	1	20301.2	2	32572.8	1	31840.6	1	23027.4	1			17910.9	1	37510.9	1	32131.1	1	25500.6	1	30036.9	1
				42717	1									14737.6	1							40557.7	1	24256	1			40658.2	1	20320.3	2	32658.1	1	32023.8	1	23160.8	1			17949.7	1	37677.3	1	32218.5	1	25716	1	30261.6	1
				42833.6	1									14821.7	1							40584.3	1	24375.9	1			40792.3	1	20383.2	2	32739.4	1	32071.9	1	23252.8	1			17978.8	1	37768	1	32315.1	1	25726.5	1	30411.2	1
				42835.6	1									14822.7	1							40750.5	1	24441	1			40878.3	1	20399.1	2	32798.5	1	32287.9	1	23339.4	1			18009.3	1	38000.4	1	32316	1	25747.3	1	30830	1
				43273.9	1									14833.1	1							40763.2	1	24504.6	1			40918.5	1	20503.1	2	32921	1	32357.8	1	23365.1	1			18013.5	1	38033.8	1	32370.4	1	25819.3	1	30926.8	1
				43436.1	1									14891.9	1							41048.9	1	24647.1	1			41062	1	20571.9	2	33081.6	1	32363.4	1	23408.2	1			18083	1	38296.8	1	32468.5	1	26006	1	31027	1
				43510.5	1									14937.3	1							41337	1	24732.7	1			41118	1	20612.2	2	33273.5	1	32603.7	1	23525.1	1			18119.1	1	38320.5	1	32569.6	1	26076.3	1	31135.9	1
				43875.4	1									14953.8	1							41506.1	1	24832.2	1			41176.7	1	20636.9	2	33278.6	1	32636.6	1	23584.5	1			18129	1	38529.8	1	32591.3	1	26202.5	1	31241.6	1
				44140.5	1									14985.5	1							41590.7	1	24966.6	1			41378.3	1	20652	2	33454.1	1	32720.9	1	23654.7	1			18178.6	1	38562.1	1	32624.3	1	26338.1	1	31319.6	1
				44288.3	1									15080.3	1							41718.4	1	25119.6	1			41459.5	1	20709.6	2	33670.1	1	32840.5	1	23842.6	1			18183.2	1	38828.6	1	32771.3	1	26499.6	1	31392.3	1
				44570.6	1									15084	1							41858.4	1	25166.5	1			41616.9	1	20795.2	2	33689.3	1	33083	1	23959.2	1			18227.9	1	38896.6	1	32827.9	1	26607.1	1	31461.8	1
				44657.4	1									15109.7	1							42079.1	1	25192.9	1			41796.9	1	20849.4	2	34038.3	1	33083.8	1	23970.9	1			18238.4	1	39143.7	1	32886.6	1	26632.7	1	31548.6	1
				44857.8	1									15217.3	1							42220.9	1	25340.5	1			41826.9	1	20917.5	2	34383.3	1	33114.3	1	24042.5	1			18333.8	1	39192.4	1	33010.9	1	26904.6	1	31640.7	1
				44981.8	1									15302.9	1							42414.4	1	25418.8	1			42072.6	1	20919.9	2	34673.3	1	33201.3	1	24112.9	1			18414.2	1	39431.8	1	33172.2	1	26917.4	1	31727.5	1
				45318.2	1									15338	1							42724	1	25439.4	1			42369.9	1	20945.7	2	35055.8	1	33256.3	1	24257.4	1			18419.9	1	39527.2	1	33699.3	1	27267.7	1	31805.8	1
				45337.4	1									15339.9	1							42912.9	1	25586.5	1			42629.6	1	21043.1	2	35174	1	33315.5	1	24297.6	1			18482.1	1	39680.5	1	34102.8	1	27310.7	1	31863.7	1
				45774.2	1									15461.2	1							43133.5	1	25644.4	1			42896.2	1	21109.1	2	35337.4	1	33494.5	1	24436.3	1			18484.9	1	39745.3	1	34239	1	27651.9	1	31946.8	1
				45788	1									15530.3	1							43412.5	1	25675.9	1			43029	1	21215.5	2	35409.9	1	33604.7	1	24477.6	1			18536.7	1	39920.5	1	34272	1	27708.9	1	31982.5	1
				45788	1									15573.6	1							43564.7	1	25828.9	1					21244.5	2	35466.8	1	33661.5	1	24583.8	1			18588.5	1	40092.6	1			27821.8	1	31989.7	1
				46035.2	1									15606.4	1							43796.8	1	25934.8	1					21273.3	2	35604.8	1	33752.9	1	24612.3	1			18590.5	1	40147.6	1			27933.4	1	32034.4	1
				46213.8	1									15688.8	1							43993.4	1	26050	1					21324	2	35840.7	1	33855.8	1	24628.9	1			18616.8	1	40459.5	1			27964.3	1	32160.9	1
				46314.6	1									15701.8	1							44217.2	1	26244.4	1					21371.4	2	36008.7	1	34007.7	1	24687.8	1			18636.4	1	40486	1			27978.9	1	32237.2	1
				46384.6	1									15773.6	1							44490	1	26283.3	1					21386.4	2	36287.8	1	34092.3	1	24758.4	1			18659.5	1	40684.9	1			28025.7	1	32308.3	1
				46572.1	1									15793.2	1							44612	1	26398.7	1					21434.5	2	36543.6	1	34180.4	1	24934.4	1			18661	1	40903.8	1			28142.7	1	32386	1
				46645.6	1									15878.3	1							44680.7	1	26508	1					21524.8	2	36769.4	1	34338	1	24961.5	1			18665.9	1	40989.7	1			28152	1	32472.4	1
				46763.9	1									15918	1							44694.1	1	26551.1	1					21560.5	2	37287.7	1	34426.1	1	24997.3	1			18672.4	1	41193.7	1			28198.5	1	32567.6	1
				46874.9	1									15934.5	1							44694.8	1	26671.9	1					21610.8	2	37402.2	1	34462.8	1	25038.8	1			18685	1	41301.7	1			28258.3	1	32621.5	1
				46985.3	1									15982.9	1							44751	1	26741.4	1					21687.1	2	37627.7	1	34678.7	1	25117.7	1			18697.9	1	41503.4	1			28272.8	1	32734	1
				47049.1	1									16044.2	1							44754.4	1	26851.8	1					21700.6	2	37864.6	1	34825.6	1	25211.7	1			18733.5	1	41640.1	1			28384.2	1	32808.5	1
				47081.6	1									16102.1	1							44809.7	1	26968.2	1					21710	2	38200.9	1	34845.5	1	25232.6	1			18768.4	1	41779.2	1			28386	1	32937	1
				47212.8	1									16132.7	1							44811.8	1	27117.4	1					21830.3	2	38503.5	1	34885.3	1	25272	1			18795.8	1	41877.4	1			28461.7	1	32998.2	1
				47356.9	1									16192.4	1							44824.3	1	27155.9	1					21911.2	2	38800.9	1	35065.7	1	25445.2	1			18828.8	1	42075.3	1			28610.1	1	33112.7	1
				47443.3	1									16236.6	1							44844.9	1	27263.1	1					22070	2	39032.8	1	35103.4	1	25530.5	1			18831	1	42195.8	1			28623.1	1	33185.4	1
				47483	1									16279.8	1							44949.3	1	27380.6	1					22118.8	2	39325.7	1	35358.5	1	25597.1	1			18903.6	1	42408.1	1			28640.3	1	33327.8	1
				47547.6	1									16317.5	1							44951	1	27419.1	1					22292.8	2	39552.9	1	35376.3	1	25658.9	1			18934.6	1	42467.2	1			28647	1	33421.5	1
				47666.5	1									16349.1	1							44972.3	1	27510.4	1					22394.2	2	39863.2	1	35487	1	25687.8	1			18966.6	1	42787.2	1			28653.3	1	33547.7	1
				47860.8	1									16396	1							45032.9	1	27633.6	1					22526.2	2	40225.6	1	35526	1	25847.5	1			19048.1	1	42816.8	1			28663.7	1	33686.3	1
				47901.3	1									16501	1							45146.1	1	27670.9	1					22631	1	40514.5	1	35526.7	1	25847.7	1			19110.9	1	43074.6	1			28671.8	1	33816	1
				47911.6	1									16550.1	1							45172.6	1	27769.5	1					22639.6	1	40741.2	1	35742.1	1	26148.8	1			19136.9	1	43087	1			28735.9	1	33878.4	1
				48104.4	1									16559.8	1							45235.5	1	27838.9	1					22847.9	1			35878.7	1	26180.3	1			19163.5	1	43471.5	1			28740	1	33953	1
				48109	1									16618.3	1							45240.4	1	27862.3	1					22869.7	1			35891.9	1	26193.4	1			19195.5	1	43532.6	1			28745.9	1	34034.6	1
				48215	1									16682.3	1							45255.9	1	27940.4	1					23053.1	1			35966.4	1	26209.2	1			19247.8	1	43734.9	1			28747	1	34076.4	1
				48435.6	1									16694	1							45260.4	1	28012.6	1					23092.9	1			35985.8	1	26286	1			19300.1	1	43869.3	1			28761.3	1	34135.6	1
				48447	1									16717.8	1							45285.5	1	28066.1	1					23209.8	1			36148.3	1	26559.1	1			19352.9	1	44049.1	1			28915.2	1	34237.9	1
				48740.8	1									16765.3	1							45290.7	1	28128.2	1					23267.3	1			36248.1	1	26643.8	1			19360	1	44165.6	1			28965.2	1	34310.5	1
				48869.6	1									16805.5	1							45290.9	1	28277.4	1					23334.2	1			36276.1	1	26657.3	1			19376.2	1	44361.5	1			28988.4	1	34402.4	1
				48917.2	1									16836.6	1							45299.9	1	28323.3	1					23364.7	1			36490.4	1	26704.6	1			19426.4	1	44435.3	1			28998.4	1	34515.3	1
				48932.4	1									16882.6	1							45312.4	1	28425	1					23433.5	1			36549.9	1	26838.2	1			19437.4	1	44473	1			29055.3	1	34590	1
				49232.1	1									16927.3	1							45324.4	1	28460.2	1					23577.2	1			36591.7	1	26994.9	1			19460.7	1	44607.7	1			29069.8	1	34662.8	1
				49508.7	1									16993.7	1							45333.6	1	28471.5	1					23613.8	1			36648.5	1	27147.2	1			19470.4	1	44650.4	1			29081.4	1	34749.6	1
				49555.1	1									17039.4	1							45344.5	1	28497.4	1					23616.9	1			36777.9	1	27183.9	1			19481.5	1	44717.2	1			29088.8	1	34883.3	1
				49671.2	1									17048.9	1							45365.2	1	28515.3	1					23718.1	1			36816.7	1	27241.8	1			19630.5	1	44932.2	1			29106.5	1	35038.2	1
				49677	1									17095.2	1							45407.7	1	28545.4	1					23852	1			36861.4	1	27320	1			19642.7	1	45114.2	1			29107.9	1	35089.4	1
				49831.1	1									17170.1	1							45465.8	1	28575	1					24085.6	1			36872.1	1	27360.5	1			19689.8	1	45230.1	1			29166.6	1	35222.9	1
				50187.3	1									17193.2	1							45472.8	1	28608.6	1					24100.7	1			36995.4	1	27591.5	1			19713.3	1	45548.6	1			29174.3	1	35378.7	1
				50457.2	1									17243.4	1							45506.6	1	28661.5	1					24269.7	1			37039.3	1	27604.1	1			19719.4	1	45571.9	1			29205.5	1	35557.3	1
				50591.7	1									17287.2	1							45514.3	1	28664	1					24315.5	1			37106.7	1	27695.6	1			19720.9	1	45813.8	1			29207.3	1	35657.8	1
				50604.9	1									17319.7	1							45521.1	1	28746.4	1					24437.1	1			37181.1	1	27711.2	1			19767.3	1	46032.8	1			29224.9	1	35763.7	1
				50780.5	1									17320.3	1							45523.6	1	28779.6	1					24521.5	1			37245	1	27854.8	1			19798.1	1	46059.1	1			29249.8	1	35873.1	1
				50817.2	1									17402.1	1							45532.7	1	28785.4	1					24619.5	1			37291.8	1	27859.1	1			19810.3	1	46329	1			29253.3	1	36069.4	1
				50843.3	1									17410.9	1							45541.4	1	28821.2	1					24686.4	1			37358.8	1	27929	1			19842	1	46385.1	1			29255.9	1	36196.3	1
				50848.9	1									17419.2	1							45556.3	1	28821.2	1					24756.1	1			37463.3	1	27937	1			19863.1	1	46555	1			29274.5	1	36323.3	1
				50934.1	1									17495.5	1							45568.5	1	28870.3	1					24894.7	1			37507.8	1	28025.9	1			19923.7	1	46624.3	1			29331.4	1	36519.7	1
				51084.9	1									17508.4	1							45573.6	1	28887.5	1					24897.3	1			37617.2	1	28038.9	1			20035.5	1	46633.3	1			29342	1	36687	1
				51263.4	1									17527.3	1							45580.8	1	28956.3	1					25037.1	1			37692.8	1	28054.4	1			20047.1	1	46902.7	1			29349.3	1	36852.6	1
				51607.2	1									17564.5	1							45596.1	1	29065.6	1					25078.5	1			37774.3	1	28073.5	1			20076.1	1	46907.7	1			29351.3	1	36911.9	1
				51634	1									17620	1							45604.7	1	29067.5	1					25182.4	1			37782.4	1	28084.6	1			20198.5	1	46924.3	1			29388.6	1	36985.4	1
				52103.5	1									17636.7	1							45640	1	29163.8	1					25251.2	1			37950.4	1	28086.4	1			20276.2	1	47061.1	1			29432	1	37093.8	1
				52417.9	1									17641.6	1							45663.6	1	29176.3	1					25313.7	1			37969.7	1	28116.3	1			20376.7	1	47079.6	1			29451.1	1	37198.7	1
				52669.1	1									17701.4	1							45671.3	1	29253.9	1					25358	1			38085.6	1	28180.3	1			20382.3	1	47223.2	1			29465.7	1	37298.4	1
				52850	1									17720.8	1							45671.3	1	29300.6	1					25466	1			38111.9	1	28217	1			20425.1	1	47318.6	1			29497.9	1	37413.9	1
				52966	1									17746.7	1							45715.3	1	29418.5	1					25523.5	1			38194.7	1	28241.5	1			20582.3	1	47466	1			29506.9	1	37490.9	1
				53064.1	1									17801.5	1							45726.8	1	29462.1	1					25551	1			38238.7	1	28276.6	1			20640.1	1	47586	1			29543.9	1	37562.7	1
				53167.5	1									17833.8	1							45766.7	1	29626	1					25595	1			38292	1	28313.6	1			20780.8	1	47704.8	1			29547.9	1	37657.3	1
				53417.8	1									17853.7	1							45783.7	1	29633.5	1					25911.9	1			38405.8	1	28319.5	1			20799.5	1	47844.5	1			29615.4	1	37770	1
				53983.4	1									17858.4	1							45865	1	29767.1	1					26011.1	1			38556.8	1	28326.5	1			20829.9	1	47927.9	1			29712.1	1	37875.4	1
				54444	1									17913.1	1							45909.6	1	29810.3	1					26064.5	1			38634.4	1	28376.1	1			21026.3	1	48076.9	1			29723.2	1	37947.4	1
				54886.7	1									17953.1	1							45911.9	1	29927.3	1					26109.1	1			38708.2	1	28387.7	1			21181.3	1	48157.3	1			29773.6	1	38019.6	1
				55329	1									17960.9	1							45981	1	30053.9	1					26158.5	1			38725.4	1	28396.7	1			21212	1	48254.1	1			29776.2	1	38072.6	1
				55861.7	1									17972.2	1							45983.8	1	30156.2	1					26199	1			38824.8	1	28418.2	1			21219.9	1	48420.4	1			29807.9	1	38111.5	1
				56421.4	1									17999.7	1							46017.1	1	30208.1	1					26221.6	1			38900	1	28435.9	1			21420	1	48525.2	1			29830.8	1	38157.6	1
				56808.5	1									18032	1							46017.5	1	30305.5	1					26285.8	1			39095.5	1	28439.2	1			21428.6	1	48662.6	1			29862.9	1	38223.4	1
				57253	1									18097.8	1							46060.2	1	30394.4	1					26354.6	1			39120.9	1	28440.7	1			21644.9	1	48795.5	1			29919.9	1	38246.3	1
				57635.4	1									18117.9	1							46091.7	1	30530.5	1					26432.7	1			39261.6	1	28465.2	1			21706.2	1	48822.1	1			29942.5	1	38310.4	1
				58435.7	1									18190.9	1							46107.8	1	30597.8	1					26518.4	1			39319.5	1	28472.7	1			21757.6	1	48855.5	1			30009.3	1	38364.9	1
				58758.4	1									18196.5	1							46198.7	1	30687.8	1					26524.6	1			39584.5	1	28484.1	1			21774.8	1	48958.2	1			30074.3	1	38409.4	1
				59250.9	1									18252.1	1							46292.4	1	30779.4	1					26695.1	1			39647	1	28557.2	1			21783.4	1	49014.6	1			30152	1	38490.7	1
				59644.7	1									18305.7	1							46303.3	1	30798.5	1					26794.7	1			39798.9	1	28601.8	1			21788.5	1	49148.1	1			30201.7	1	38535.4	1
				59767.8	1									18312	1							46409.3	1	30896.5	1					26901.2	1			40032.2	1	28620	1			21888.1	1	49241.6	1			30202.7	1	38580.1	1
				60223.7	1									18319.3	1							46433.9	1	30904.8	1					27179.1	1			40118.2	1	28628.4	1			21898.9	1	49382	1			30329	1	38672.1	1
				60927.2	1									18386	1							46507.3	1	30970.4	1					27216.3	1			40132.5	1	28638.9	1			21907.8	1	49491.6	1			30342	1	38723.2	1
				61511.5	1									18415	1							46512.3	1	31121.4	1					27379.3	1			40297.9	1	28639.1	1			21926.1	1	49519.9	1			30368.6	1	38796.7	1
				61949.7	1									18439.8	1							46560.1	1	31174.4	1					27466	1			40495	1	28668.4	1			22044.5	1	49555.4	1			30467	1	38870.1	1
				62380.4	1									18485.2	1							46608.8	1	31254	1					27586.9	1			40560	1	28673.1	1			22063.3	1	49685.7	1			30471.7	1	38941.2	1
				62848.7	1									18510	1							46637.3	1	31437	1					27634.2	1			40695.6	1	28676.2	1			22122.9	1	49817.9	1			30590.9	1	39001.9	1
														18525.9	1							46665	1	31490.9	1					27769.7	1			40931.2	1	28713.2	1			22241.7	1	50017.4	1			30612.3	1	39002.5	1
														18576.8	1							46672.3	1	31605.4	1					27788.6	1			40984	1	28781.4	1			22245.7	1	50088.8	1			30806.7	1	39012.3	1
														18576.9	1							46695.6	1	31704.1	1					27861.8	1			41244.9	1	28806	1			22314.3	1	50222.4	1			30834.9	1	39018.2	1
														18627.5	1							46724.2	1	31821	1					28074.7	1			41304.8	1	28835.6	1			22428.9	1	50301.5	1			30882.5	1	39026.7	1
														18672.4	1							46745.4	1	31861.2	1					28083.7	1			41494.1	1	28854	1			22482.2	1	50422.2	1			30947.1	1	39078.3	1
														18676.5	1							46812.7	1	31936	1					28257.7	1			41589.3	1	28865.9	1			22558.9	1	50463.9	1			31082.4	1	39083.5	1
														18737.9	1							46837	1	32075.9	1					28262.7	1			41714.7	1	28900.4	1			22651.2	1	50543.9	1			31149.3	1	39096.1	1
														18741.6	1							46877.4	1	32169.9	1					28425.3	1			41877.9	1	28901.2	1			22843.1	1	50622.1	1			31157.5	1	39114.4	1
														18777.2	1							46880.1	1	32332.8	1					28494.2	1			41929.9	1	28916.1	1			22896.4	1	50702.2	1			31277.2	1	39117.6	1
														18797.9	1							46887.5	1	32364.8	1					28519.2	1			42149.3	1	28916.2	1			22945.4	1	50871.4	1			31374.6	1	39135.8	1
														18891.6	1							46918.7	1	32544.8	1					28613.2	1			42267.4	1	28925	1			22967.5	1	51055	1			31417	1	39136.3	1
														18895.6	1							46961.8	1	32667.4	1					28708	1			42452.7	1	28949.8	1			23049.1	1	51214.9	1			31427.2	1	39160.1	1
														18910	1							47018.6	1	32685.2	1					28737.5	1			42475.4	1	28956.4	1			23160.8	1	51362.9	1			31444.7	1	39161.8	1
														18962.9	1							47035.1	1	32795.9	1					28867.7	1			42568.1	1	28968.3	1			23412.6	1	51507	1			31451	1	39476.9	1
														18967.3	1							47065.9	1	32903	1					28929.7	1			42734.1	1	28973.7	1			23432.3	1					31462.1	1	39596.5	1
														19046.7	1							47086.2	1	32946	1					28998.2	1			42825.8	1	28976.6	1			23646.2	1					31583	1	39708.2	1
														19052.9	1							47112.4	1	33092.6	1					29116.2	1			42977.8	1	28984.5	1			23725	1					31605.5	1	39825.4	1
														19084.3	1							47129.1	1	33223.2	1					29231	1			43067.4	1	29017.4	1			23947.6	1					31677.3	1	39930.6	1
														19154.6	1							47135.5	1	33230.9	1					29285.9	1			43209.7	1	29017.6	1			24012.6	1					31710	1	39976.6	1
														19173.1	1							47155.7	1	33492.5	1					29406.5	1			43439.8	1	29027.9	1			24196.5	1					31726.1	1	40059.8	1
														19197.6	1							47188.8	1	33552.4	1					29475.2	1			43448.9	1	29032.3	1			24321.5	1					31746.3	1	40150.8	1
														19264.4	1							47198.6	1	33651.1	1					29523.4	1			43602.7	1	29078.7	1			24454.1	1					31782	1	40237.3	1
														19300.4	1							47254.1	1	33675.1	1					29574	1			43827	1	29089.9	1			24619.9	1					31802	1	40294.3	1
														19303.8	1							47271.8	1	33793.7	1					29621.5	1			43999.9	1	29098.4	1			24622.4	1					31804.3	1	40356.8	1
														19303.8	1							47455.1	1	33793.7	1					29656.7	1			44025.6	1	29150.9	1			24792.1	1					32024.7	1	40411.5	1
														19389	1							47472.6	1	33892.6	1					29683.3	1			44040.2	1	29180.3	1			24916.5	1					32039.8	1	40480.5	1
														19428.1	1							47489.1	1	33972	1					29762.5	1			44246.9	1	29229.5	1			25002.6	1					32057.7	1	40526.6	1
														19444.7	1							47516.5	1	34022.8	1					29807.8	1			44293.8	1	29244.3	1			25111.4	1					32160.2	1	40593.3	1
														19467.2	1							47517.9	1	34045.4	1					29903.5	1			44301.6	1	29254.3	1			25185.7	1					32175.7	1	40656.9	1
														19544.8	1							47564.9	1	34256.8	1					29950.8	1			44484.1	1	29269.4	1			25330.7	1					32176.4	1	40723.8	1
														19568.6	1							47610.2	1	34310.5	1					30032.8	1			44510.2	1	29270.1	1			25456.8	1					32177.5	1	40778.6	1
														19587.1	1							47618.5	1	34463.8	1					30092.8	1			44552	1	29280	1			25668.4	1					32228.1	1	40847.8	1
														19679.7	1							47639.1	1	34465.4	1					30222.1	1			44629	1	29286	1			25762.1	1					32288.4	1	40920.2	1
														19722	1							47675.5	1	34496.6	1					30268.4	1			44636.7	1	29317.5	1			25848.6	1					32295.6	1	41001.5	1
														19728	1							47700.9	1	34743.3	1					30359	1			44834.3	1	29330	1			26049.5	1					32296	1	41076.2	1
														19802.1	1							47780	1	34811.6	1					30374.5	1			44837	1	29348.7	1			26083.8	1					32325.8	1	41126.8	1
														19818.9	1							47873.6	1	34833.4	1					30436.8	1			44899.8	1	29365	1			26310.7	1					32384.3	1	41198.3	1
														19888.6	1							47910.8	1	34906.4	1					30460	1			44924.7	1	29376.1	1			26439.9	1					32407.1	1	41272.7	1
														19903.6	1							48042.3	1	35030.8	1					30584.1	1			44929.4	1	29471	1			26563.8	1					32422.1	1	41331	1
														19932.3	1							48113.6	1	35111.6	1					30601.3	1			44935.6	1	29487.2	1			26597.9	1					32465.7	1	41398.2	1
														19988	1							48143.6	1	35150.4	1					30710.2	1			44948.4	1	29487.8	1			26832.4	1					32493.5	1	41468.7	1
														19991.9	1							48221.8	1	35248.3	1					30730.1	1			45084.1	1	29497.6	1			26845.2	1					32532.1	1	41544.8	1
														20033.3	1							48287.5	1	35292.7	1					30779.4	1			45131.8	1	29506.4	1			27014.6	1					32541.4	1	41604.6	1
														20066.5	1							48301	1	35421.2	1					30797.5	1			45165.6	1	29515.5	1			27194.6	1					32575.4	1	41673.5	1
														20100.2	1							48323.4	1	35426.3	1					30861	1			45444	1	29535	1			27242.5	1					32594.6	1	41728.6	1
														20106.1	1							48353	1	35428.2	1					30929.7	1			45681.7	1	29536.4	1			27442.5	1					32606.5	1	41815.6	1
														20145.9	1							48406.2	1	35596.2	1					31030.8	1			46053.1	1	29553.4	1			27532.8	1					32706.2	1	41872.3	1
														20218.7	1							48427.3	1	35617.6	1					31102.6	1			46336.2	1	29553.4	1			27597.3	1					32755.9	1	41907.8	1
														20287.2	1							48596.2	1	35762.4	1					31132.3	1			46630.3	1	29588.9	1			27698.7	1					32786.4	1	41975.4	1
														20341.2	1							48633.3	1	35865.4	1					31238.7	1			46943.3	1	29606.2	1			27869.6	1					32810.1	1	42064.4	1
														20365	1							48659.6	1	35940.7	1					31240.8	1			47201.3	1	29638.5	1			27895.8	1					32879.1	1	42094.6	1
														20388.9	1							48666.5	1	36118.9	1					31416.3	1			47509.9	1	29655.2	1			28025	1					32883.4	1	42151.7	1
														20467.9	1							48854.5	1	36172.2	1					31510.8	1			47830.2	1	29726.5	1			28053.2	1					32884	1	42210.6	1
														20468.8	1							48862.1	1	36354	1					31579.2	1			47959.7	1	29730	1			28205.8	1					32891.6	1	42280.1	1
														20541.8	1							48915.9	1	36479.7	1					31643.7	1			48225.5	1	29841.9	1			28286.9	1					32929.3	1	42348	1
														20549.9	1							49048.7	1	36579.7	1					31680.3	1			48400.6	1	29862	1			28385.7	1					32947.9	1	42406.9	1
														20642.6	1							49422.4	1	36603.2	1					31763.3	1			48508.5	1	29880.7	1			28486.8	1					33036	1	42450	1
														20731	1							49488.1	1	36748.2	1					31784.9	1			48736.9	1	29912.2	1			28498.1	1					33104.6	1	42466.6	1
														20753.3	1							49852.2	1	36889.4	1					31899.8	1			49045.6	1	29944.3	1			28613	1					33126.4	1	42479.7	1
														20786.7	1							49960.7	1	36993.2	1					31980.7	1			49280.3	1	29950.4	1			28674	1					33183.1	1	42509.1	1
														20830.9	1							49983.5	1	37093.9	1					32025.2	1			49651.2	1	29956	1			28783.6	1					33311.4	1	42518.2	1
														20912.1	1							50052.4	1	37245.9	1					32145.6	1			49773.7	1	29966.8	1			28815.2	1					33322.3	1	42578.7	1
														20927.7	1							50115.7	1	37462.1	1					32152.4	1			49976.1	1	30037.1	1			28976.1	1					33458.4	1	42811.6	1
														20955	1							50179.5	1	37553.2	1					32260.7	1			50262	1	30097.1	1			29020.7	1					33460.9	1	42949.1	1
														21031.8	1							50223.4	1	37594.5	1					32322.9	1					30187.2	1			29185.2	1					33468.4	1	43058.2	1
														21141	1							50240.4	1	37759.1	1					32393.1	1					30203.3	1			29265.1	1					33483.4	1	43150.1	1
														21156.5	1							50278.1	1	37764.1	1					32434.7	1					30321.6	1			29375.4	1					33587.8	1	43222.2	1
														21188.5	1							50298.3	1	37774.1	1					32504.9	1					30375.5	1			29541.6	1					33704.4	1	43351.5	1
														21232	1							50337	1	37795.6	1					32506.8	1					30412.8	1			29634	1					33740.8	1	43492.1	1
														21238.9	1							50474.3	1	37849.4	1					32571.9	1					30428.5	1			29743.4	1					33831.7	1	43519.4	1
														21356.8	1							50531.5	1	37949.1	1					32639.1	1					30429.2	1			29872.7	1					33836.8	1	43577.4	1
														21388.2	1							50747.7	1	38006.1	1					32643.2	1					30520.1	1			29878.2	1					33853.2	1	43617.2	1
														21452.6	1							50771.1	1	38110.5	1					32713.3	1					30528.8	1			30128	1					33884.2	1	43758.4	1
														21482.2	1							50831.9	1	38132.7	1					32758.9	1					30550.6	1			30195.4	1					33923.4	1	43828.8	1
														21537.6	1							50869.7	1	38244.1	1					32893.4	1					30595.9	1			30284.7	1					33935.4	1	43892.1	1
														21561.1	1							50904	1	38290.5	1					32893.7	1					30613.1	1			30437	1					33956.8	1	43959	1
														21601.2	1							50910.7	1	38411.5	1					33038.8	1					30667.8	1			30460.5	1					33972.6	1	44017.2	1
														21665.2	1							50918.8	1	38416.4	1					33098.5	1					30679.5	1			30639.3	1					34063.6	1	44048.8	1
														21678.2	1							50964.4	1	38563.5	1					33124.9	1					30741.5	1			30702.4	1					34115.8	1	44089.3	1
														21679.3	1							51078.3	1	38642.4	1					33158	1					30832.4	1			30862.6	1					34127.7	1	44126.4	1
														21766.9	1							51102.5	1	38716.7	1					33167.7	1					30856.4	1			30867.5	1					34148.6	1	44216.6	1
														21827.7	1							51110.1	1	38829.9	1					33185.8	1					30869.7	1			31090.8	1					34149.6	1	44298	1
														21881.9	1							51114.1	1	39001.4	1					33227.4	1					30909.3	1			31217	1					34151.7	1	44390.6	1
														21917.2	1							51118.5	1	39158.1	1					33242.8	1					30937.2	1			31318.4	1					34162.5	1	44491	1
														21934.2	1							51168.3	1	39276.2	1					33320.7	1					30979.1	1			31420.2	1					34180.6	1	44569.1	1
														21995.5	1							51213.3	1	39477.3	1					33383.9	1					31013.7	1			31489.2	1					34212.7	1	44623.4	1
														22016.3	1							51223	1	39531.7	1					33390.9	1					31052.9	1			31730.9	1					34261.9	1	44706.1	1
														22040.3	1							51230.4	1	39653.7	1					33448.2	1					31182.6	1			31806.1	1					34327.6	1	44738.8	1
														22066.3	1							51301.8	1	39813.3	1					33466.2	1					31195.1	1			32070	1					34329.7	1	44771.5	1
														22077	1							51360	1	39924.2	1					33519.5	1					31214.5	1			32258.2	1					34330.4	1	44813.1	1
														22093.4	1							51362.4	1	39989.4	1					33539.1	1					31223.9	1			32423.5	1					34352.2	1	44869.1	1
														22100.5	1							51440.2	1	40125.6	1					33608.3	1					31263	1			32581.8	1					34468.6	1	44933.8	1
														22167.7	1							51535.3	1	40361.8	1					33645.7	1					31328.1	1			32809.5	1					34475.6	1	45007.1	1
														22215.2	1							51608.6	1	40691.8	1					33770.1	1					31328.7	1			32911.7	1					34501.5	1	45111.5	1
														22252.9	1							51609.8	1	40963.6	1					33824.6	1					31344.1	1			33179	1					34521.9	1	45183.3	1
														22266.3	1							51619.1	1	41182	1					33964.2	1					31370.7	1			33214.8	1					34526.5	1	45218.8	1
														22320	1							51866.2	1	41446.6	1					34047.5	1					31379.1	1			33389	1					34540.1	1	45233.8	1
														22357.4	1							51966.3	1	41663.8	1					34128.4	1					31383.8	1			33495.6	1					34566	1	45238.6	1
														22429	1							52118.4	1	41890.6	1					34161.4	1					31452.1	1			33780	1					34567.8	1	45309.5	1
														22448.9	1							52272.4	1	42156.6	1					34202.1	1					31505.7	1			33807.4	1					34590.2	1	45346.2	1
														22499.7	1							52351.9	1	42361	1					34276.5	1					31524.2	1			33990.5	1					34604.7	1	45388.5	1
														22533.6	1							52394	1	42597	1					34327.2	1					31575.6	1			34083.7	1					34646.4	1	45465.6	1
														22585.7	1							52464.9	1	42976.7	1					34463.2	1					31609.2	1			34090.7	1					34694.2	1	45508	1
														22648.4	1							52649.2	1	43370	1					34463.6	1					31610.4	1			34323.4	1					34706.7	1	45562.1	1
														22757	1							52724.9	1	43731.1	1					34584.3	1					31658.6	1			34343.6	1					34769	1	45613.3	1
														22757	1							52744.2	1	43947.7	1					34591.9	1					31680.1	1			34395.5	1					34822.4	1	45690.6	1
														22839.3	1							52869.8	1	44213.3	1					34753.7	1					31697.7	1			34621.3	1					34890.7	1	45771.2	1
														22876.3	1							53035.4	1	44316.3	1					34762.7	1					31765.3	1			34632.2	1					34972.9	1	45843.3	1
														22898.2	1							53137.2	1	44558.4	1					34852.1	1					31793.1	1			34844.7	1					35026.8	1	45912.3	1
														22906.6	1							53333.2	1	44845.7	1					34962.7	1					31874.3	1			34944.1	1					35056.7	1	45960	1
														22932.1	1							53346.9	1	45161.9	1					35043.4	1					31879.5	1			35104.6	1					35058.5	1	46046.6	1
														22959.1	1							53572.2	1	45351.8	1					35076.8	1					31914.4	1			35170.4	1					35064.3	1	46118.8	1
														22981.4	1							53716.2	1	45691.7	1					35231.5	1					31947.3	1			35334.9	1					35120	1	46211.2	1
														23016.9	1							53787.7	1	45854.8	1					35319.8	1					32009.4	1			35517.9	1					35135.9	1	46311.6	1
														23052.9	1							54015.8	1	45970.1	1					35510.8	1					32028.3	1			35602.7	1					35149.6	1	46429.7	1
														23138.4	1							54230	1	46123.3	1					35527	1					32081.4	1			35882.4	1					35151	1	46497.4	1
														23140.7	1							54230.2	1	46248.3	1					35752.4	1					32174.4	1			35939.8	1					35158	1	46785	1
														23166.4	1							54241.9	1	46408.7	1					35757.5	1					32185.5	1			36150.8	1					35207.3	1	46901.3	1
														23167.6	1							54550.1	1	46500.4	1					35961.1	1					32185.6	1			36166.7	1					35224.1	1	46958.8	1
														23251	1							54832.8	1	46581.2	1					36046.5	1					32231.6	1			36420.9	1					35226.7	1	47030.7	1
														23265.8	1							54914.1	1	46583.2	1					36143.8	1					32255.7	1			36423	1					35231.1	1	47128.3	1
														23342.7	1							55081.2	1	46780.9	1					36236.2	1					32297	1			36699.5	1					35232.8	1	47219.8	1
														23371.4	1							55173.3	1	46926.6	1					36325.9	1					32297.4	1			36821.4	1					35235	1	47362	1
														23396.1	1							55362.7	1	47173.4	1					36409.8	1					32410.1	1			36927.3	1					35237.7	1	47405.1	1
														23452.7	1							55552.3	1	47286	1					36521.4	1					32480.5	1			36977.1	1					35252.7	1	47439.2	1
														23473.6	1							55635.9	1	47488.1	1					36521.9	1					32520.3	1			37049.1	1					35259.9	1	47496.4	1
														23501.8	1							55792.5	1	47505.9	1					36577.2	1					32524.5	1			37199.8	1					35261.1	1	47594.7	1
														23551.1	1							55952.8	1	47517.6	1					36688.2	1					32528.5	1			37284.9	1					35295.1	1	47723.7	1
														23584.2	1							56095.2	1	47556	1					36770.3	1					32555.4	1			37327.6	1					35304.3	1	47810.7	1
														23611.2	1							56190.2	1	47722.5	1					36827	1					32562.2	1			37327.9	1					35326.4	1	47933.4	1
														23668	1							56410	1	47825	1					36946.7	1					32659	1			37426.1	1					35326.6	1	47981.1	1
														23697.2	1							56724.5	1	48025.8	1					37025.5	1					32770.5	1			37523.2	1					35417.4	1	48021.1	1
														23723.2	1							56763.2	1	48236.9	1					37119	1					32828.5	1			37574.9	1					35449.3	1	48077.2	1
														23727.2	1							56999.3	1	48521.4	1					37228	1					32833.4	1			37620.8	1					35456.4	1	48152.3	1
														23809.9	1							57093.4	1	48735.3	1					37276.4	1					32904.5	1			37693.5	1					35459.6	1	48165.9	1
														23815	1							57119.5	1	49050.2	1					37369.5	1					32920.2	1			37734.9	1					35462.3	1	48199	1
														23825.3	1							57389.2	1	49316.7	1					37468.3	1					32945.3	1			37799.1	1					35505.8	1	48301.1	1
														23891.1	1							57713.2	1	49598	1					37535.2	1					33025.2	1			37852.6	1					35544.6	1	48390.9	1
														23906.8	1							58056.7	1	49856.2	1					37609.6	1					33142.9	1			37922.6	1					35603.8	1	48424.7	1
														23920	1							58366.4	1	50108	1					37655.5	1					33231.2	1			38085.8	1					35626.9	1	48464.7	1
														24002.6	1							58673.6	1	50390.1	1					37713.7	1					33272.4	1			38159.7	1					35641.5	1	48572.6	1
														24018.7	1							58924	1	50652.9	1					37849.4	1					33281.5	1			38215.5	1					35663.5	1	48598.4	1
														24040.7	1							59195.6	1	50897.4	1					37920.4	1					33306.8	1			38272.1	1					35664.3	1	48615.6	1
														24108.3	1							59512.9	1	51154.5	1					37968.9	1					33496.5	1			38340.2	1					35716.1	1	48641.4	1
														24123.3	1							59882	1	51543.6	1					38054.1	1					33509.3	1			38467.8	1					35747	1	48651.1	1
														24143.1	1							60114.6	1	51818.7	1					38120	1					33535	1			38607.1	1					35763.7	1	48664.4	1
														24208.2	1							60371.8	1	52006.1	1					38149.5	1					33555.2	1			38624.2	1					35765.2	1	48758.8	1
														24223	1							60574.8	1	52363.6	1					38249.8	1					33564.4	1			38647.3	1					35770.5	1	48838.9	1
														24272.6	1							60793.5	1	52541.8	1					38289.1	1					33582.1	1			38819.3	1					35770.8	1	48862.1	1
														24331.3	1							61009.8	1	52833.8	1					38346.5	1					33624.3	1			38930.4	1					35778.7	1	48867.8	1
														24377.6	1							61250.6	1	53103.4	1					38488	1					33758	1			38949.7	1					35780.5	1	48877.1	1
														24402.6	1							61474	1	53345.1	1					38494.8	1					33862.3	1			38990.8	1					35784.1	1	48957.1	1
														24447.1	1							61732.3	1	53642.2	1					38529.8	1					33878.9	1			39265.5	1					35790.8	1	49060.4	1
														24465.7	1							61979.5	1	54066.8	1					38560.7	1					33912.9	1			39377.2	1					35803.3	1	49069.6	1
														24474	1							62126.6	1	54331.2	1					38593.4	1					33952.3	1			39380.4	1					35830.2	1	49099.8	1
														24581.7	1							62335.4	1	54638.1	1					38655.7	1					34038.8	1			39394.9	1					35832.1	1	49142.4	1
														24597.1	1							62605.9	1	54907	1					38703.2	1					34052	1			39548.2	1					35835.4	1	49155.5	1
														24653.5	1							62793	1	55143.2	1					38734.7	1					34093.4	1			39624.4	1					35838.1	1	49200.4	1
														24674.1	1							63074.1	1	55388.8	1					38765.5	1					34110.4	1			39840	1					35843.6	1	49252	1
														24756.7	1									55558.9	1					38826	1					34131.9	1			39868.3	1					35847.5	1	49294.6	1
														24768.2	1									55685.5	1					38970.8	1					34132.8	1			40201.2	1					35849	1	49322.5	1
														24790	1									55816.6	1					38993.2	1					34205.4	1			40270.9	1					35850.2	1	49366.9	1
														24838.4	1									56084.9	1					39108	1					34266.6	1			40512.2	1					35853.6	1	49431	1
														24869.7	1									56423.3	1					39225.5	1					34273.7	1			40615.2	1					35854.4	1	49493.5	1
														24879	1									56615.3	1					39290.2	1					34288.1	1			40843.8	1					35856.9	1	49530.2	1
														24920	1									56875.2	1					39388.9	1					34338.3	1			40850.8	1					35857.9	1	49530.6	1
														24993.4	1									57132.4	1					39587.2	1					34515.7	1			41130.9	1					35877.1	1	49573.5	1
														25014.1	1									57384.9	1					39614.2	1					34558.6	1			41168.7	1					35884.8	1	49626.6	1
														25020	1									57634.3	1					39843.2	1					34567.8	1			41175.3	1					35887	1	49630.7	1
														25136	1									57875.8	1					39864	1					34616.6	1			41191.9	1					35899.3	1	49673.6	1
														25149.3	1									58082.8	1					40106.2	1					34644.3	1			41197.4	1					35920.5	1	49674.6	1
														25155.5	1									58276.1	1					40106.9	1					34654.8	1			41224.4	1					35922.8	1	49694.1	1
														25249.6	1									58458.9	1					40356.5	1					34811.8	1			41306	1					35936.2	1	49694.1	1
														25261.5	1									58560	1					40404.5	1					34876.5	1			41343.8	1					35949.4	1	49706.7	1
														25321.9	1									58693.2	1					40524.9	1					34992.4	1			41428.1	1					35969.2	1	49709.6	1
														25369.1	1									58907.7	1					40669	1					35000.8	1			41454.7	1					35997.8	1	49724.1	1
														25419.4	1									59033.3	1					40709.5	1					35112.8	1			41572.1	1					35998.6	1	49739.3	1
														25419.4	1									59132.1	1					40864.6	1					35306.9	1			41680.9	1					36000.9	1	49740.4	1
														25475.2	1									59246.9	1					40954.6	1					35315	1			41808.9	1					36011.4	1	49742	1
														25540.9	1									59549.9	1					40993.2	1					35341.9	1			41865.1	1					36014.3	1	49756.4	1
														25544.3	1									59731.2	1					41050.5	1					35412.8	1			41909.7	1					36024.2	1	49762.6	1
														25637.2	1									59831.3	1					41050.9	1					35489.8	1			41979.4	1					36040.8	1	49775.1	1
														25652.2	1									59998.8	1					41146.3	1					35518.4	1			42053.9	1					36045.3	1	49779.1	1
														25658.3	1									60230.1	1					41177.5	1					35573.3	1			42111.4	1					36074.4	1	49792.5	1
														25737	1									60331.7	1					41242.3	1					35656.5	1			42128.1	1					36085.5	1	49794.6	1
														25771	1									60475.2	1					41299.8	1					35741	1			42133.7	1					36085.6	1	49801.1	1
														25777.6	1									60654.2	1					41514.8	1					35764.2	1			42227.7	1					36134.6	1	49810.9	1
														25829.9	1									60851.2	1					42009.5	1					35841.1	1			42295.4	1					36137.4	1	49856.5	1
														25857.2	1									60981.5	1					42305.4	1					35871.9	1			42330.5	1					36207.3	1	49902.7	1
														25907.6	1									61153.8	1					42493.5	1					36119.1	1			42598.9	1					36226	1	49946.3	1
														25923.4	1									61397.9	1					42808	1					36152.2	1			42681.9	1					36260.4	1	49948.3	1
														25935.7	1									61454.4	1					43066.2	1					36160.6	1			42991.8	1					36286	1	50008.9	1
														25955.4	1									61708.9	1					43163.2	1					36253.9	1			43051.9	1					36294	1	50018.1	1
														26014.9	1									61827.5	1					43230.4	1					36485.9	1			43248.1	1					36368.1	1	50080	1
														26026	1									61952.6	1					43328.4	1					36585	1			43375.9	1					36370.9	1	50123	1
														26054.7	1									62180.9	1					43445.2	1					36611.9	1			43623.7	1					36373.4	1	50129	1
														26078	1									62361.1	1					43607.3	1					36612.9	1			43764.1	1					36429.5	1	50171.8	1
														26090.7	1									62621.6	1					43675.1	1					36643.8	1			44006.2	1					36467.5	1	50191.2	1
														26144.4	1									62825.3	1					43814.2	1					36724.8	1			44315.2	1					36469.1	1	50214.8	1
														26151.9	1									63133.6	1					43968.7	1					36736.2	1			44330.2	1					36536.8	1	50227.7	1
														26198.6	1									63343.4	1					44088.1	1					36837.3	1			44606.6	1					36561.9	1	50257.8	1
														26225.3	1									63420.4	1					44258.5	1					37005.7	1			44705.8	1					36616.8	1	50270.3	1
														26285.1	1									63663.8	1					44421.2	1					37032.6	1			44882.2	1					36621.6	1	50313	1
														26295.5	1									63852.7	1					44543.4	1					37035.4	1			44949.7	1					36640	1	50372.3	1
														26366.4	1									64022.7	1					44737.2	1					37120	1			44977.4	1					36650.3	1	50434.8	1
														26376.2	1									64255.7	1					44894.6	1					37270.2	1			45041.4	1					36671.1	1	50437.3	1
														26452.8	1									64416.8	1					45177.1	1					37315.3	1			45242.9	1					36680.7	1	50495.4	1
														26498.4	1									64526.9	1					45460.8	1					37431.5	1			45274.1	1					36681.5	1	50508.5	1
														26498.5	1									64612.2	1					45719.2	1					37437.4	1			45491.6	1					36703.8	1	50525.5	1
														26540.5	1									64715.2	1					45773.4	1					37596.4	1			45600.5	1					36731.2	1	50553.5	1
														26607.6	1									64772.3	1					45912.2	1					37604	1			45689.6	1					36755.6	1	50647	1
														26649.9	1									64879.2	1					46058.6	1					37646.9	1			45948.1	1					36826.8	1	50735.4	1
														26690.9	1									65063.4	1					46187.1	1					37751	1			46030.5	1					36848.8	1	50750.1	1
														26743.8	1									65192.9	1					46253.1	1					37782.3	1			46175.5	1					36893.9	1	50777.1	1
														26759.5	1									65271.3	1					46360.8	1					37860.4	1			46355.6	1					36896.1	1	50798.4	1
														26777.9	1									65432	1					46434.9	1					37995.9	1			46373.2	1					36899.4	1	50805.6	1
														26890.2	1									65548.3	1					46588.3	1					38037.6	1			46510.7	1					36941.4	1	50820.7	1
														26891.2	1									65719.4	1					46662.7	1					38055.5	1			46666.7	1					36997.1	1	50834.6	1
														26923.7	1									65853.1	1					46757	1					38066.4	1			46684.2	1					37007.7	1	50847.1	1
														27035.5	1									66121.6	1					46932.9	1					38079.6	1			46832.8	1					37017.8	1	50860.9	1
														27084.5	1									66356.4	1					47074.2	1					38108.5	1			46957.3	1					37025.4	1	50872.9	1
														27099	1									66442.1	1					47213.5	1					38162.7	1			47012.3	1					37064.2	1	50936.7	1
														27173.5	1															47347.9	1					38197.9	1			47017.5	1					37069.3	1	51006.4	1
														27218.9	1															47505.2	1					38399.4	1			47112.3	1					37092.6	1	51016.9	1
														27281.3	1															47788.5	1					38420.5	1			47228.1	1					37093.6	1	51032.1	1
														27341.9	1															48009.9	1					38449.2	1			47405.7	1					37094.2	1	51054.6	1
														27348.5	1															48205.4	1					38510	1			47875.5	1					37096.2	1	51055.9	1
														27404.8	1															48357.9	1					38560.3	1			48210.2	1					37122.2	1	51056.9	1
														27468.1	1															48498.7	1					38579.3	1			48259.5	1					37147.1	1	51059.3	1
														27511.9	1															48669.1	1					38740.3	1			48486.3	1					37171.1	1	51067.8	1
														27521.9	1															48885.5	1					38755	1			48726.9	1					37218.5	1	51068.4	1
														27589.1	1															49040.4	1					38773.3	1			48937	1					37236.7	1	51068.9	1
														27699	1															49129.6	1					38840	1			49170.2	1					37244.1	1	51070.5	1
														27752.1	1															49327.8	1					38907.7	1			49428.6	1					37254.9	1	51071.7	1
														27773	1															49475.3	1					38922.2	1			49782.3	1					37262.2	1	51075.4	1
														27882.9	1															49643.6	1					38981.3	1			50262.4	1					37272.3	1	51080.2	1
														27902.3	1															49797.5	1					39025.9	1			50503.5	1					37295.4	1	51084.5	1
														27903.2	1															49927.9	1					39103.5	1			50619.1	1					37309	1	51088	1
														28005.2	1															50033.5	1					39217.3	1			50916	1					37329.9	1	51089.2	1
														28029.1	1															50149.5	1					39259.2	1			51172.4	1					37330.4	1	51094.8	1
														28065.4	1															50398.2	1					39293.4	1			51418.2	1					37351.1	1	51095.1	1
														28132.7	1															50616.9	1					39341.3	1			51656.7	1					37361	1	51097.1	1
														28150.8	1															50740.1	1					39409.2	1			51894.6	1					37363.4	1	51102	1
														28160.9	1															50953.1	1					39510.5	1			52086.1	1					37397.4	1	51109	1
														28229.8	1															51066	1					39577.7	1									37397.6	1	51109.5	1
														28251.8	1															51219.2	1					39688.5	1									37430.8	1	51117.5	1
														28308.2	1															51319.3	1					39738.8	1									37442.9	1	51119.2	1
														28309.1	1															51461	1					39776.3	1									37467.9	1	51131	1
														28376.6	1															51594.8	1					39838.8	1									37532.9	1	51137.5	1
														28380.5	1															51732.6	1					39965.7	1									37542	1	51138.5	1
														28428.9	1															51870.4	1					39999.7	1									37568.2	1	51142	1
														28459.4	1															52131.9	1					40019.5	1									37585.4	1	51151.3	1
														28519.7	1															52300.7	1					40037.1	1									37615.9	1	51157.5	1
														28547.8	1															52446.5	1					40106	1									37620.7	1	51160.1	1
														28564.4	1															52560.9	1					40260.6	1									37622.8	1	51164.3	1
														28652.9	1															52759.6	1					40285.8	1									37635.2	1	51165.6	1
														28673.5	1															52825.3	1					40405.2	1									37636.1	1	51173.3	1
														28701.4	1															52966	1					40421.2	1									37647.8	1	51174.6	1
														28744.7	1															53102.4	1					40432.1	1									37755.1	1	51191.8	1
														28755.3	1															53265.7	1					40569.7	1									37831.6	1	51198.4	1
														28811	1															53354.6	1					40712	1									37851.4	1	51203.5	1
														28815.2	1															53535.1	1					40714.6	1									37931.9	1	51203.6	1
														28838.4	1															53666.7	1					40735	1									37963	1	51250.3	1
														28924.6	1															53815.2	1					40776.4	1									37965	1	51311.3	1
														28928.5	1															53999.4	1					40899.1	1									37967.8	1	51327.4	1
														28936.4	1															54123.5	1					41017.2	1									38038.3	1	51354.3	1
														29013.2	1															54286.8	1					41034.6	1									38086.7	1	51362.2	1
														29045.9	1															54401.5	1					41060.4	1									38127.8	1	51366.7	1
														29098.3	1															54572	1					41120.8	1									38190.4	1	51377.7	1
														29142.8	1															54711.9	1					41157.7	1									38219.6	1	51390.2	1
														29147.6	1															54869.6	1					41278.3	1									38225.9	1	51403.3	1
														29174.4	1															55017.8	1					41350.8	1									38236.6	1	51403.7	1
														29251.7	1															55158.8	1					41499.4	1									38297.5	1	51424.1	1
														29261.7	1															55259.4	1					41500.1	1									38317	1	51438	1
														29275.6	1															55386.6	1					41629.5	1									38339	1	51447	1
														29361.2	1																					41644.5	1									38343.6	1	51454.4	1
														29370.9	1																					41656.6	1									38436.5	1	51461.3	1
														29386.1	1																					41863.3	1									38464.8	1	51487.1	1
														29439.3	1																					41900.4	1									38479.7	1	51510.7	1
														29465.5	1																					41903.7	1									38567.6	1	51526.5	1
														29524.3	1																					42027	1									38613.2	1	51546.9	1
														29526.4	1																					42134.1	1									38672	1	51567	1
														29551.2	1																					42154.1	1									38711.1	1	51573.5	1
														29657.6	1																					42230.9	1									38711.1	1	51605.5	1
														29672.6	1																					42403.6	1									38810.5	1	51610.3	1
														29701.9	1																					42412.9	1									38887.8	1	51682.2	1
														29803.5	1																					42478	1									38955.8	1	51739.7	1
														29844.5	1																					42527.2	1									38986.8	1	51740	1
														29904.8	1																					42703.4	1									39049.9	1	51787.1	1
														30007.4	1																					42780.6	1									39086.3	1	51792.4	1
														30027	1																					42806.6	1									39127.8	1	51796	1
														30169.8	1																					42866.3	1									39281.8	1	51807.5	1
														30194.4	1																					42989.7	1									39292.1	1	51832.9	1
														30278.7	1																					43066.4	1									39355.8	1	51845.7	1
														30278.9	1																					43141	1									39378.2	1	51860.2	1
														30397.2	1																					43191.3	1									39444.1	1	51863.7	1
														30400.9	1																					43264.9	1									39565.1	1	51884.8	1
														30501.7	1																					43321.2	1									39610.7	1	51909.2	1
														30519.9	1																					43472.6	1									39620.7	1	51925.9	1
														30595	1																					43479.1	1									39622	1	51926	1
														30606.2	1																					43559.5	1									39796.9	1	51931.8	1
														30684	1																					43586.7	1									39871.4	1	51945.9	1
														30752.1	1																					43591.9	1									39880.9	1	51947.8	1
														30794.1	1																					43662.6	1									39905	1	51948.6	1
														30890.1	1																					43865.4	1									39931.6	1	51965.4	1
														30899.6	1																					43888.8	1									40056.2	1	51979.8	1
														30994.6	1																					43912.7	1									40138.7	1	52017.6	1
														31007.7	1																					43945.4	1									40190.1	1	52019.2	1
														31140	1																					44165.5	1									40190.3	1	52019.9	1
														31237.4	1																					44169.1	1									40294	1	52030.7	1
														31239.8	1																					44266.6	1									40358.2	1	52063.7	1
														31256.7	1																					44297.9	1									40433.6	1	52064.2	1
														31295.7	1																					44471.8	1									40449.4	1	52068.1	1
														31305.9	1																					44493.6	1									40580.5	1	52101.8	1
														31308	1																					44603	1									40594.8	1	52134.7	1
														31321.5	1																					44639.5	1									40603.3	1	52151.5	1
														31351	1																					44771.3	1									40682.6	1	52152.9	1
														31354	1																					44831.5	1									40809.5	1	52158.5	1
														31401.4	1																					44928.5	1									40811.6	1	52182.1	1
														31452	1																					44965.1	1									40831.9	1	52202.7	1
														31459.1	1																					45048.7	1									40875.5	1	52268.4	1
														31469.1	1																					45273	1									41016.3	1	52282.5	1
														31505.7	1																					45298.2	1									41032.9	1	52328.3	1
														31580.2	1																					45348.7	1									41083.9	1	52343.6	1
														31586	1																					45454.8	1									41125.3	1	52348.8	1
														31601.1	1																					45525.3	1									41239.7	1	52360.6	1
														31626.6	1																					45554.5	1									41350	1	52370.3	1
														31659.4	1																					45683.6	1									41417.1	1	52379.8	1
														31697	1																					45737.4	1									41494.7	1	52418.9	1
														31702.6	1																					45996.4	1									41499	1	52423.7	1
														31715.7	1																					46001.4	1									41554.8	1	52472.6	1
														31729.1	1																					46051	1									41625.1	1	52479.2	1
														31729.6	1																					46150	1									41666.4	1	52483.4	1
														31750	1																					46237.3	1									41666.6	1	52972.2	1
														31769.4	1																					46313.5	1									41810.2	1	53173.9	1
														31821.4	1																					46501	1									41863.4	1	53509.5	1
														31863.8	1																					46514.6	1									41867.3	1	53512.3	1
														31873.7	1																					46687.6	1									41965.2	1	53784.1	1
														31879.7	1																					46747.2	1									42139.1	1	54102.4	1
														31969.8	1																					46886	1									42183.1	1	54442.4	1
														31983.1	1																					46891.6	1									42185.9	1	54545.8	1
														31993.7	1																					47139.5	1									42186.6	1	55108.9	1
														31996.5	1																					47230.4	1									42384	1	55296.8	1
														32043.1	1																					47456	1									42426.1	1	55539.9	1
														32056.9	1																					47593	1									42518.7	1	56074.8	1
														32086.9	1																					47656.1	1									42539.8	1	56752.4	1
														32127.3	1																					47814.7	1									42561.1	1	57201.6	1
														32175.8	1																					47988.9	1									42580.2	1	57533.1	1
														32188.1	1																					48140.6	1									42756.8	1	58048.9	1
														32220.5	1																					48397.1	1									42761.3	1	58607.5	1
														32253.2	1																					48413.3	1									42846.1	1	59164.5	1
														32254.5	1																					48635.2	1									42892.2	1	60522.5	1
														32279.2	1																					48793	1									42936.9	1	61174.2	1
														32333.8	1																					48812.9	1									42944.9	1	61413	1
														32368.2	1																					48972.4	1									43024.7	1
														32413.8	1																					49108.1	1									43122.7	1
														32441.2	1																					49200.2	1									43247.3	1
														32452.4	1																					49277.9	1									43278.6	1
														32500.5	1																					49499.4	1									43292.6	1
														32568.3	1																					49661.1	1									43395.5	1
														32581.6	1																					49768.6	1									43526.9	1
														32619.1	1																					49891.7	1									43709.9	1
														32649.4	1																					49918.4	1									43774.7	1
														32666.8	1																					49949.3	1									43881.4	1
														32669.5	1																					49992.6	1									44051.6	1
														32724.8	1																					50012	1									44212	1
														32760.1	1																					50024.8	1									44269.8	1
														32769	1																					50032.3	1									44357.2	1
														32779.4	1																					50049.4	1									44518.2	1
														32818.6	1																					50149.9	1									44543.8	1
														32835.5	1																					50192.6	1									44614.7	1
														32849.5	1																					50306.4	1									44760.5	1
														32889	1																					50420.9	1									44902.6	1
														32928.9	1																					50526.5	1									44919.3	1
														32942.4	1																					50545.7	1									45108.1	1
														32947.1	1																					50575.8	1									45143.8	1
														32961.7	1																					50597.7	1									45283.4	1
														32966.5	1																					50666.4	1									45469.8	1
														32980.3	1																					50795.7	1									45670.5	1
														32991.2	1																					50949.3	1									45679.9	1
														32994.8	1																					50981.7	1									45958.6	1
														33004.3	1																					50991	1									46053.4	1
														33013.2	1																					51149.9	1									46287.3	1
														33020.2	1																					51323.3	1									46417.1	1
														33030.5	1																					51472.2	1									46479.5	1
														33035.2	1																					51484.3	1									46758.1	1
														33058.3	1																					51531.4	1									46773.2	1
														33060.2	1																					51744	1									46783.8	1
														33062.8	1																					51772.4	1									46894.5	1
														33101.2	1																					51880.1	1									46917.4	1
														33171.9	1																					51936.2	1									46976.7	1
														33181.3	1																					52025.9	1									46977.4	1
														33219.5	1																					52263	1									46991.1	1
														33269.2	1																					52508.8	1									47008	1
														33316.6	1																					52575.8	1									47025.9	1
														33325.4	1																					52700.6	1									47034.9	1
														33342.6	1																					52982.8	1									47064.5	1
														33401	1																					53005.1	1									47177.8	1
														33412.9	1																					53261.2	1									47244.9	1
														33519.5	1																					53470.9	1									47495.4	1
														33522.4	1																					53546.4	1									47506.8	1
														33616.6	1																					53552.3	1									47803.3	1
														33618.8	1																					53757.7	1									47950.1	1
														33707.2	1																					53912.6	1									48144.1	1
														33812.6	1																					53985.4	1									48235.2	1
														33830.6	1																					54089.4	1									48394.9	1
														33885.8	1																					54155.7	1									48522.8	1
														33917.1	1																					54204.3	1									48565.7	1
														33982.9	1																					54356.4	1									48757.3	1
														34029.7	1																					54538.4	1									48960.1	1
														34089.1	1																					54560	1									49074.6	1
														34103.5	1																					54701	1									49168.3	1
														34192.8	1																					54878.1	1									49339.1	1
														34229.2	1																					54878.2	1									49572.9	1
														34297.4	1																					55185.9	1									49639.4	1
														34305.2	1																					55191.5	1									49833.3	1
														34309.6	1																					55492.7	1									49999.7	1
														34315.7	1																					55557.6	1									50070.6	1
														34329.4	1																					55819.2	1									50374.4	1
														34469.3	1																					55956.1	1									50376.3	1
														34469.3	1																					56275.2	1									50739.1	1
														34471.1	1																					56798.7	1									50779.7	1
														34552.4	1																					57293.2	1									50933.9	1
														34602.6	1																					57603.9	1									51115.4	1
														34632.7	1																					57820.3	1									51127.2	1
														34653.8	1																					58019.3	1									51208.6	1
														34718.8	1																															51298	1
														34724.9	1																															51609.4	1
														34845.9	1																															51655.2	1
														34850.8	1																															51741	1
														34898.5	1																															51930.4	1
														34938.5	1																															52039.2	1
														34984.3	1																															52239.6	1
														34987.3	1																															52268.4	1
														35010.5	1																															52435.8	1
														35082.2	1																															52586.8	1
														35104.6	1																															52595.2	1
														35189.9	1																															52849.7	1
														35194.5	1																															53068.2	1
														35240.8	1																															53074.7	1
														35311.8	1																															53419.1	1
														35349.2	1																															53534.5	1
														35363.3	1																															53669.4	1
														35370.2	1																															53969.2	1
														35455.8	1																															54021.6	1
														35470.5	1																															54284.9	1
														35517	1																															54350.1	1
														35550	1																															54416.4	1
														35565.7	1																															54667	1
														35616.3	1																															54731.7	1
														35663	1																															54956.5	1
														35672.3	1																															54960.8	1
														35690.3	1																															55185.1	1
														35735.2	1																															55269.8	1
														35791	1																															55521.6	1
														35808.6	1																															55669.1	1
														35815.5	1																															55829.9	1
														35859.3	1																															56020.5	1
														35950.8	1																															56122.6	1
														35965.9	1																															56236.4	1
														35988.9	1																															56294.9	1
														36036.9	1																															56370.4	1
														36045.8	1																															56605.5	1
														36122.8	1																															56618.6	1
														36207.5	1																															56815.8	1
														36238.4	1																															57016.5	1
														36270.2	1																															57029.2	1
														36369	1																															57156.6	1
														36444.6	1																															57214.3	1
														36493.9	1																															57233.2	1
														36578.7	1																															57326.4	1
														36632.4	1																															57367.7	1
														36672.9	1																															57403	1
														36739.4	1																															57505	1
														36784.4	1																															57544.1	1
														36863.2	1																															57612.3	1
														36946	1																															57685.5	1
														36954.9	1																															57861.5	1
														36978.5	1																															57921.9	1
														37034.3	1																															58029.8	1
														37070.2	1																															58246.9	1
														37153	1																															58274.1	1
														37217.1	1																															58401.3	1
														37268.5	1																															58527.9	1
														37348.7	1																															58632.6	1
														37384.3	1																															58713.2	1
														37402.8	1																															58899.6	1
														37436.8	1																															58905.7	1
														37513.3	1																															59099.6	1
														37529.1	1																															59291.5	1
														37566.2	1																															59347.3	1
														37566.4	1																															59462.6	1
														37588.4	1																															59694.9	1
														37613.9	1																															59751.2	1
														37615.8	1																															59826.8	1
														37621.7	1																															59965.9	1
														37627.3	1																															60056.9	1
														37664.3	1																															60172.6	1
														37665.5	1																															60264.7	1
														37669.6	1																															60424.8	1
														37676.5	1																															60532.7	1
														37689	1																															60717.6	1
														37749.1	1																															60916	1
														37761.7	1																															61149.8	1
														37845.4	1																															61345.2	1
														37857.7	1																															61555.8	1
														37907.5	1																															61777.9	1
														37922.6	1																															61973.3	1
														38003.4	1																															62263	1
														38113.7	1																															62602.7	1
														38152.8	1																															62857.1	1
														38224.9	1																															62961.5	1
														38293.9	1																															63226.7	1
														38300.4	1																															63515.1	1
														38411.5	1																															63967.6	1
														38506	1																															64235.1	1
														38529.6	1																															64447.2	1
														38610.3	1																															64681.7	1
														38651.1	1																															64948.3	1
														38686.4	1																															65187.8	1
														38698	1
														38778.4	1
														38786.1	1
														38830	1
														38884.5	1
														38929.9	1
														39003.5	1
														39049.8	1
														39107.6	1
														39175	1
														39271.7	1
														39312.9	1
														39375.1	1
														39445.8	1
														39510.2	1
														39581.5	1
														39597	1
														39600.5	1
														39607.4	1
														39624	1
														39653.7	1
														39676	1
														39717.9	1
														39756.2	1
														39830.3	1
														39928.2	1
														39938.4	1
														40051.1	1
														40122.4	1
														40189.6	1
														40194.3	1
														40316.8	1
														40452.1	1
														40469.4	1
														40550.2	1
														40619.6	1
														40689	1
														40770.4	1
														40772.9	1
														40902.1	1
														40967.7	1
														41057.9	1
														41123	1
														41281.3	1
														41421	1
														41601	1
														41833.6	1
														42038.8	1
														42216	1
														42353.3	1
														42502	1
														42688.5	1
														42739	1
														42792.3	1
														42906.5	1
														43009	1
														43178.2	1
														43370.6	1
														43590.7	1
														43791.5	1
														44102.1	1
														44371.4	1
														44456.8	1
														44500	1
														44596.6	1
														44715.3	1
														44823	1
														44934.2	1
														45027.8	1
														45208.8	1
														45324.1	1
														45575.8	1
														45786.1	1
														45886.5	1
														46116.9	1
														46381.4	1
														46651.3	1
														46936	1
														47102.7	1
														47216.2	1
														47312.2	1
														47532.1	1
														47629.1	1
														47837.2	1
														48060.2	1
														48118.4	1
														48298	1
														48548.3	1
														48780.4	1
														49045.1	1
														49261.4	1
														49370.4	1
														49479.6	1
														49582.4	1
														49712.2	1
														49852.5	1
														49927.1	1
														50023.3	1
														50127.7	1
														50344	1
														50480.1	1
														50829.3	1
														51032.5	1
														51286.6	1
														51608.2	1
														51950.6	1
														52229.4	1
														52396.6	1
														52583.5	1
														52739.4	1
														52818.6	1
														53056.4	1
														53232.1	1
														53380.3	1
														53552.2	1
														53709.9	1
														53840.8	1
														53966.9	1
[truncated: 208 more columns]
