# Supplementary material for: FluoEM, virtual labeling of axons in three-dimensional electron microscopy data for long-range connectomics
Source: eLife journal article supplement (doi:10.7554/elife.38976), 2018-08-14
Supplement: supp [file elife-38976-supp-v1.zip › elife_poa_e38976_Figure_1_source_data_4.csv]

L1	L23	L4
12.8640969327816	14.4999977931033	14.9423564060827
12.0930863230194	26.8219891879778	9.48629645499233
25.5899597247671	12.5308789795449	21.1067999578903
25.1405957964405	10.9110688752294	23.8517299532592
26.9826261907324	21.0764721905731	15.9475653584113
27.1149315405663	23.0604815214254	11.3151326199917
32.1765830242802	14.9248646225016	12.136912798698
21.4344982284914	22.2322824739162	12.6223612118811
39.3295416885984	14.5506420476899	16.2381695766487
35.9818475939188	17.4769113976126	14.6463917658924
Inf	29.2509298313746	14.1732745218598
14.6902203404578	18.4780752244383	11.3371516953422
39.2267926062991	22.5947381485159	23.4805594831128
27.254502957772	13.3083895344253	16.9268673681576
24.9877785068461	24.3314078507595	22.6309909351579
14.5243141869074	27.657519194606	17.3118021210965
42.6212012449204	18.9812083914592	17.8029737917686
25.3524763631484	18.279655576624	8.99059560429675
8.03569985671441	13.8427685092253	13.6442793055551
33.9535264720235	15.105755194627	12.901005543321
20.3766193002863	20.0934186240172	15.307032305238
16.114908064671	15.2677919818158	16.5829169244979
20.2060080255354	16.0447718587707	17.6432097565947
17.0455038336331	9.78013987630034	25.1007520613068
26.0317712202916	16.49656109618	14.9058883122074
26.5676649212233	18.7636491120464	13.1325860466246
17.6778988953326	16.5659293732649	15.5429894820269
44.0952505393858	14.5178775308238	14.8992492363877
14.7229209648086	43.1113774310216	8.38220225172359
28.8663356790293	26.1050064163945	32.8244354262126
29.3464146957682	24.126628939825	13.8866718695013
38.4100233057987	26.7430574168325	32.2926103051952
11.6639091396324	39.0711762812434	8.3893747722223
17.087469712652	Inf	22.5365502036492
19.3429857054179	27.5967989448052	34.0997663944374
11.0812003786593	17.9887885084016	14.8487346792917
16.0921390745171	17.6630747040259	6.366711102728
16.7228373763306	20.7130741320549	20.6932449264778
23.9923350808545	8.44221961334814	9.65285686184147
42.3550652584174	15.1389833212141	19.5579001018003
24.2761104429849	17.3181162947937	44.4521177216654
15.0951525104452	19.5246453488917	16.1860350906823
8.20259726671985	21.3330335395602	14.1575877322657
9.90547782350756	22.0615390215642	15.7022174232813
19.7969802732033	34.4385386449542	19.7094139047512
21.7594631883785	14.5446187987173	18.0113618703306
12.1108387257035	23.2814350073186	21.1564991884007
19.7719167653923	21.2669693186406	13.0241875275197
26.21767144571	23.270088611778	23.8714229059267
20.464594466776	14.5782171749498	14.2622660614083
31.4785774764998	23.0200663769677	16.5207053234903
11.4078229729603	22.673691186042	18.936182649267
20.5290965952231	19.6655581156498	15.5772280489694
17.9023577286569	14.0944687022959	20.6562659350813
25.0430847883243	Inf	13.5630580020879
28.110563232977	10.8414205711244	21.7960488626723
28.7699416605317	34.7867416122867	14.4548028207098
32.6589288503833	20.3398442471913	14.4116753083047
9.43307481119492	16.3662051801876	21.5335281963732
10.5577332320153	19.7069888110792	17.2407189338728
28.0131524123937	30.6444594665985	20.7170366626118
35.7672523208815	10.2425817058005	10.3588087377652
30.3036453127606	27.1025386264829	33.1619412919328
41.3966570142083	19.5201348355999	6.96313687586277
11.1799342173378	22.7646452201654	17.3081513874128
17.3712966672267	41.8088679588434	14.4186078112972
13.6790832360067	25.2585491269788	20.3502187428047
33.4814028341705	12.9965761645135	17.2060390995255
14.3683007096038	38.8254969832969	10.5471341901011
16.2707496039242	19.8655714239485	22.2249748293761
29.4277462956306	24.8761736607542	33.8414783571404
9.78861562461209	18.4632274535088	55.451684141768
14.1815144151533	23.6414740657176	16.3141391379135
15.0530498387005	17.6817017280577	32.2764420246098
16.5625495115698	25.1907411562264	19.1368465117532
28.2733298025684	14.5402420887687	16.9364406240272
36.2855651062513	25.9040089561442	17.1382767746585
11.7327463329606	20.2237741284855	20.6663312122883
8.75816422280377	20.3100841948033	16.5910950025126
12.7835917437941	7.11859986233248	16.88487691492
22.6321982208357	13.467988713984	14.8938163738378
10.4933936161758	24.186907202038	11.7585607511804
10.3320123468761	8.69221720851475	17.6526723318596
15.6337015872761	11.016653575383	20.1598770031962
39.1654230291159	17.0152933562722	12.41123604307
9.38426627354531	61.6813645763451	19.367624494749
14.9261682287183	12.7946338751838	9.97795666873734
30.9799382673368	25.2951830987641	14.0095010542417
25.8484199982281	26.6867157964407	16.6674353177686
8.50079500282179	19.0775734306017	15.6014012485033
15.765409864079	21.0017759249069	22.1289779032652
10.561079463161	9.04377354869083	14.1277302128827
16.3562939361214	17.5972093242082	33.3217604648974
Inf	18.6238067000278	18.8508858038661
40.5858914961936	15.0067472824726	10.6485713977416
25.9552264531366	28.8114727148752	21.5817352690649
35.7327905725148	31.4299793191151	20.2919820171416
24.6770127909194	14.4329872167892	24.1512565856106
19.5866937987196	27.47748722136	10.993958619169
12.8279651055341	14.8563489458211	8.25636469136387
Inf	22.1717138715075	23.9305752245783
16.288882205971	23.7796312839371	9.45732807974853
26.3450726779791	10.1535956192868	14.6869763281623
18.5593348048469	12.5498028669776	14.2866759423457
11.869078855244	15.7858802732062	12.366563518391
11.5496753116614	24.5491845893097	15.2441608455959
28.3039657905107	13.5213378036347	12.013062129399
69.3021785154262	29.9001016720679	10.5224436104928
28.3644944907396	21.5689142981282	32.0295669954372
36.3268430137275	17.4192720858249	21.0595132987256
20.017076764363	17.6331782727902	32.8402164230627
13.8806981162188	18.3393020586935	7.99975955658669
20.1051036311878	12.7201415086468	16.309665832898
26.2347938805244	21.7141848569086	12.9605160728113
33.7105383392197	28.3962042533857	20.0903702308544
23.965261672813	20.9410074256231	7.8613834306183
44.3110082963229	19.11274548567	7.77851245470495
28.7759420529025	25.8723450811866	9.35924662301406
30.8253847411772	13.7026233984591	24.1577956528819
19.8528930501527	61.2548848011324	9.9051864818387
22.0799527508552	13.6668831852767	25.6217421556927
19.3950781869215	16.1441035675568	17.480427057575
9.91043915273183	12.1063289233359	11.5823480591459
13.31420048784	12.0715824977507	Inf
30.46423611794	Inf	15.8093514080749
10.0431934479029	14.5552827523205	14.790649465659
21.0481996944157	15.7880466176155	35.0120946283881
14.3935467067155	22.2897924620217	15.1200541644003
19.9383384141006	19.227134575906	NaN
9.08221232167582	Inf	NaN
22.6882595690723	21.914119284151	NaN
26.3273854908838	20.4675751372751	NaN
26.3753940203668	21.0297697562289	NaN
13.2409188605625	21.3081111316794	NaN
22.446401410685	31.6584130998381	NaN
20.3418063768191	11.3481557973091	NaN
14.8448701428608	23.5208724327989	NaN
10.1730421113844	31.5501429473782	NaN
24.1424499169078	38.0946799435302	NaN
12.8070210637134	25.4904207889944	NaN
32.1499787748359	16.8245691772479	NaN
26.0594291674703	19.183436605572	NaN
14.61856443978	9.46516307308015	NaN
55.299592484531	19.3719884369158	NaN
18.9766777100735	21.3424309768124	NaN
7.65773120374436	49.4521863621822	NaN
13.8029763936913	13.9296483803433	NaN
33.3796041247945	Inf	NaN
25.6299499855618	17.1261358163481	NaN
21.6207862902347	20.5581294868964	NaN
22.9445991742196	25.1836318270419	NaN
24.340077469359	13.9851080796682	NaN
77.6076615979118	28.4864860591825	NaN
16.7532065644759	19.5283547694116	NaN
29.5182741473007	14.4290207567943	NaN
35.2002020506474	24.3684665089948	NaN
13.7314763880946	29.1534832224213	NaN
20.8637611989785	50.2795145561291	NaN
19.4827104415787	Inf	NaN
16.5814199351443	13.0768840325209	NaN
12.6040938148206	19.6434575367984	NaN
18.327878844689	19.2822338954801	NaN
14.3413373261492	37.7380997931798	NaN
27.635276523545	26.2783944715045	NaN
24.5400439771407	18.6107310979445	NaN
11.0176121485556	17.374628398904	NaN
26.879534092867	19.9138580892804	NaN
18.4888584975925	10.0251435899941	NaN
9.71694670645054	8.85483732205171	NaN
10.807053821278	28.8812753181019	NaN
22.9479058931311	13.5059933362933	NaN
17.7494750457584	34.9751934948186	NaN
11.1741169168754	13.936314577391	NaN
20.6867704148134	17.4540608455454	NaN
21.8681830802653	15.9524914668524	NaN
18.242269652694	10.9478019711721	NaN
23.1549019751412	14.411100721319	NaN
14.1141813920043	17.6666288804627	NaN
24.7001815253573	9.99842707629555	NaN
15.1226109073268	19.1458975240128	NaN
19.2629682962933	14.2215543454293	NaN
25.6884811481567	33.8598431183607	NaN
13.4814121573076	21.993816585577	NaN
14.1778707468223	22.9239734775627	NaN
34.81492846545	23.14775116507	NaN
16.2339702148304	41.7886815298114	NaN
21.9221905337947	21.9506931097858	NaN
20.2978760417931	17.8746716892926	NaN
19.2619300695647	17.5609904048718	NaN
14.0702096372158	16.663869898676	NaN
10.7303295663833	29.4473178405097	NaN
39.0823951459478	22.8630108253484	NaN
21.8042193801475	45.106635254694	NaN
20.4073765873421	48.6007244390451	NaN
14.3270173014204	23.5384825339273	NaN
10.7160896677846	11.8948513231566	NaN
14.1322672138903	24.7043251273942	NaN
18.7413885542347	28.231850948884	NaN
9.43121986069671	32.3407569484698	NaN
26.2744756759255	29.2820900893362	NaN
26.5774573228366	22.0403513583609	NaN
17.6815021688091	34.6215826328029	NaN
24.1372974916083	22.3300654723626	NaN
19.7804287251414	44.154834480496	NaN
31.8383912195827	19.4370071770322	NaN
16.13447354892	9.24477538937534	NaN
17.6856262579079	31.4436135327987	NaN
17.0656752166915	8.22315268008566	NaN
18.1064703057885	25.0215078682321	NaN
21.1996319062761	13.8455769110572	NaN
26.8357114189879	Inf	NaN
16.5139854389666	17.8740755285413	NaN
21.829682443682	11.4028543794964	NaN
6.93025313015333	23.9945063712509	NaN
12.2640582482635	NaN	NaN
15.2017143354294	NaN	NaN
17.7763260948487	NaN	NaN
12.9826482104692	NaN	NaN
25.7397595853264	NaN	NaN
29.8644336835641	NaN	NaN
