# Supplementary material for: FluoEM, virtual labeling of axons in three-dimensional electron microscopy data for long-range connectomics
Source: eLife journal article supplement (doi:10.7554/elife.38976), 2018-08-14
Supplement: supp [file elife-38976-supp-v1.zip › elife_poa_e38976_Figure_1_source_data_5.xlsx]

## Sheet: Sheet1
sphereDiam	L1	L23	L4
1000	5.73816	4.75006	5.29187
2000	12.4822	11.4266	10.0075
3000	18.159	17.6702	17.1437
4000	26.2665	23.8375	20.7088
5000	35.2002	34.9752	32.0296
