# Supplementary material for: FluoEM, virtual labeling of axons in three-dimensional electron microscopy data for long-range connectomics
Source: eLife journal article supplement (doi:10.7554/elife.38976), 2018-08-14
Supplement: supp [file elife-38976-supp-v1.zip › elife_poa_e38976_Figure_3_source_data_1.xlsx]

## Sheet: Sheet1
residuals	mean	median	std
3.85066	2.72482	2.6752	1.05433
1.96731
1.14976
4.22583
2.6752
2.77869
2.4263
