# Supplementary material for: FluoEM, virtual labeling of axons in three-dimensional electron microscopy data for long-range connectomics
Source: eLife journal article supplement (doi:10.7554/elife.38976), 2018-08-14
Supplement: supp [file elife-38976-supp-v1.zip › elife_poa_e38976_Figure_4_source_data_1.xlsx]

## Sheet: Sheet1
uniqueFraction_binDists	uniqueFraction_binFracs	mack_lm_dist	mack_lm_counts
0	0	1648.1	193
2500	0	1685.39	193
5000	0	1772.54	193
7500	0	1908.33	192
10000	0	1983.33	191
12500	0	2166.13	190
15000	0	2247.27	188
17500	0	2729.28	185
20000	0	2986.73	169
22500	0	3336.43	167
25000	0	3355.24	160
27500	0	3660.69	155
30000	0	3862.76	153
32500	0	4078.46	145
35000	0	4204.77	142
37500	0	4392.43	134
40000	0	4718.86	131
42500	0	5071.94	116
45000	0	5230.96	115
47500	0	5731.35	105
50000	0	5775.21	101
52500	0	6202.27	100
55000	0	6367.93	88
57500	0	6637.55	86
60000	0	6899.46	78
62500	1	7083.03	73
65000	1	7412.45	71
67500	1	7439.87	71
70000	1	7796.52	70
72500	1	7931.56	67
75000	1	8065.58	65
77500	1	8427.03	63
80000	1	8496.74	61
82500	1	8945.77	58
85000	1	8952.15	58
87500	1	9367.05	57
90000	1	9409.28	54
92500	1	9761.37	54
95000	1	9943.29	54
97500	1	10253.3	54
100000	1	10451.7	53
102500	1	10644.9	53
105000	1	10974.8	50
107500	1	11224.9	46
110000	1	11410.8	46
112500	1	11665.5	46
115000	1	11825.2	45
117500	1	12169.4	45
120000	1	12202.5	45
		12607.9	44
		12794.1	44
		12901.9	42
		13330.1	41
		13439.7	36
		13780.4	33
		13963.3	33
		14361	33
		14443.6	29
		14940.9	28
		15042.1	26
		15475.2	26
		15734	26
		15924.6	24
		16376.2	23
		16722	22
		17008.6	22
		17258.9	22
		17605.5	19
		17779	15
		18114.3	14
		18505.5	12
		19254.4	12
		19320	11
		19748.4	11
		20264.9	11
		20350.4	11
		20823.4	11
		21290.1	11
		21527.8	10
		21941.2	10
		22088.2	9
		22275.6	9
		22553.6	9
		22600.7	9
		23106.5	9
		23213.7	8
		23921.5	8
		24138.5	7
		24343.6	7
		24609.2	7
		24790.3	7
		24876.2	7
		25054.1	7
		25296.5	7
		25530.5	7
		25680.3	7
		26066.8	7
		26374.8	7
		26572.3	7
		27025.8	7
		27277.9	6
		27726.7	6
		28149.3	4
		28241.7	4
		28876	4
		29092.2	4
		29610.2	4
		29750.7	4
		30314.4	4
		30697.3	4
		30955.3	4
		31540.3	4
		31547.2	4
		31948	4
		32210.8	4
		32369.3	4
		32738.3	4
		32755.9	4
		33372.3	4
		33633.5	3
		34111.4	3
		34276.4	3
		34595.6	3
		35019	3
		35325.3	3
		35587	3
		35864.7	3
		36256.2	3
		36263.2	3
		36686.3	3
		36870.9	3
		37207.8	3
		37515.1	3
		37770.7	3
		38124.1	3
		38218.8	3
		38788.1	3
		38974.6	3
		39366.5	3
		39576.4	3
		39927.5	3
		40245.9	3
		40576.5	3
		40961.3	3
		41309.3	3
		41576.8	3
		41958.3	3
		42355	3
		42484.1	2
		43131.5	2
		43998.8	2
		44683.7	2
		45354	2
		45961.8	2
		46681.7	2
		47458.5	2
		48267.8	2
		49289.3	2
		50271.5	2
		51091.1	2
		52025.5	2
		52855.1	2
		53773.7	2
		54462.2	2
		55148.5	2
		55771.6	2
		56458.2	2
		56896.4	2
		57427.9	2
		57969.6	2
		58648.8	2
		59243.2	2
		59876.1	2
		60224.5	2
		60904.2	2
		61542.3	2
		62176.2	2
		63007.6	2
		63736.2	1
		64478.8	1
		65066.1	1
		65754.7	1
