# Supplementary material for: FluoEM, virtual labeling of axons in three-dimensional electron microscopy data for long-range connectomics
Source: eLife journal article supplement (doi:10.7554/elife.38976), 2018-08-14
Supplement: supp [file elife-38976-supp-v1.zip › elife_poa_e38976_Figure_5_source_data_1.xlsx]

## Sheet: Sheet1
ind	name	reconstruction_effort	time_effort_findmatch	time_effort_tree	time_effort_cps	time_effort_complete
1	mack	193	178.383	0.113298	0.266667	178.763
2	travis	2	0.196027	0.126507	0.2	0.522533
3	brain	1	0.0623717	0.169863	0.4	0.632234
4	erwin	1	0.070475	0.139112	0.4	0.609587
5	freddy	1	0.0613267	0.160135	0.4	0.621462
6	donald	1	0.0831367	0.134491	0.166667	0.384294
7	young	1	0.151612	0.120374	0.366667	0.638652
8	angelo	1	0.0834017	0.151094	0.366667	0.601162
9	hilario	1	0.0519783	0.185051	0.2	0.437029
10	orval	1	0.040925	0.0535963	0.266667	0.361188
11	malcom	3	0.0909383	0.0551564	0.0666667	0.212761
12	clinton	1	0.051705	0.160408	0.133333	0.345446
13	modesto	1	0.0697167	0.141653	0.266667	0.478036
14	tony	1	0.0741867	0.0873574	0.233333	0.394877
15	jack	2	0.07813	0.119295	0.433333	0.630758
16	johnny	1	0.0910967	0.140096	0	0.231193
17	daron	1	0.0456317	0.161268	0.333333	0.540233
18	ismael	1	0.08869	0.167488	0.233333	0.489511
19	cletus	1	0.1008	0.0824533	0.3	0.483253
20	buster	1	0.0783917	0.129263	0.333333	0.540988
21	kenneth	1	0.0732167	0.124603	0.166667	0.364487
22	rogelio	1	0.04828	0.0576984	0.133333	0.239312
23	jarred	1	0.0684017	0.253035	0.5	0.821437
24	rosendo	1	0.085845	0.131361	0.3	0.517206
25	nick	1	0.0594767	0.0899076	0.166667	0.316051
26	elwood	3	0.077905	0.0739569	0	0.151862
27	dwight	1	0.078635	0.154205	0.2	0.43284
28	boyd	1	0.0674617	0.120631	0.233333	0.421426
29	judson	1	0.0682633	0.101293	0.166667	0.336223
30	josef	1	0.0665267	0.126416	0.266667	0.45961
31	jere	1	0.0177783	0.024522	0.0333333	0.0756336
32	ron	1	0.048645	0.0535285	0.166667	0.26884
33	van	1	0.075805	0.151592	0.233333	0.46073
34	antonio	1	0.0499783	0.159679	0.3	0.509657
35	lionel	1	0.032575	0.0338813	0.166667	0.233123
36	brendan	1	0.052435	0.226606	0.5	0.779041
37	kent	1	0.054545	0.114257	0.166667	0.335469
38	colby	2	0.120612	0.155417	0.433333	0.709362
