# Supplementary material for: FluoEM, virtual labeling of axons in three-dimensional electron microscopy data for long-range connectomics
Source: eLife journal article supplement (doi:10.7554/elife.38976), 2018-08-14
Supplement: supp [file elife-38976-supp-v1.zip › elife_poa_e38976_Figure_5_source_data_2.xlsx]

## Sheet: Sheet1
zRange	fracCh1	fracCh2
0	0	0
0.444	0	0
0.888	0	0
1.332	0	0
1.776	0	0
2.22	0	0
2.664	0	0
3.108	0	0
3.552	0	0
3.996	0	0
4.44	0	0
4.884	0	0
5.328	0	0
5.772	0	0
6.216	0	0
6.66	0	0
7.104	0	0
7.548	0	0
7.992	0	0
8.436	0	0
8.88	0	0
9.324	0	0
9.768	0	0
10.212	0.0468055	0.0209554
10.656	0.086813	0.0227021
11.1	0.138958	0.0257377
11.544	0.1677	0.0287164
11.988	0.167474	0.0301122
12.432	0.162337	0.034336
12.876	0.181469	0.044597
13.32	0.214753	0.0535615
13.764	0.248088	0.0725142
14.208	0.274583	0.09479
14.652	0.302644	0.123184
15.096	0.378368	0.16062
15.54	0.504211	0.195986
15.984	0.669718	0.260768
16.428	0.767788	0.350842
16.872	0.827978	0.429534
17.316	0.853564	0.461013
17.76	0.876177	0.462201
18.204	0.903395	0.45038
18.648	0.902662	0.428812
19.092	0.883877	0.371385
19.536	0.848371	0.317562
19.98	0.829222	0.337524
20.424	0.818296	0.364774
20.868	0.784342	0.376295
21.312	0.765288	0.387531
21.756	0.782139	0.389576
22.2	0.782928	0.416353
22.644	0.79288	0.428519
23.088	0.823639	0.447478
23.532	0.820204	0.44683
23.976	0.799165	0.414483
24.42	0.770023	0.360199
24.864	0.748658	0.296024
25.308	0.733855	0.266939
25.752	0.719573	0.255374
26.196	0.702358	0.234863
26.64	0.706043	0.212602
27.084	0.698278	0.203439
27.528	0.677807	0.220925
27.972	0.638367	0.245173
28.416	0.594441	0.248863
28.86	0.535451	0.259147
29.304	0.491305	0.270541
29.748	0.452423	0.260194
30.192	0.412571	0.229491
30.636	0.402602	0.199555
31.08	0.410924	0.187854
31.524	0.416591	0.204046
31.968	0.430143	0.213412
32.412	0.458902	0.231341
32.856	0.499756	0.245665
33.3	0.545552	0.278675
33.744	0.576862	0.302207
34.188	0.612409	0.33482
34.632	0.642753	0.378384
35.076	0.644109	0.387544
35.52	0.636384	0.394886
35.964	0.616265	0.391983
36.408	0.58596	0.37619
36.852	0.539573	0.397271
37.296	0.516033	0.432041
37.74	0.464307	0.441974
38.184	0.391554	0.432413
38.628	0.353949	0.434767
39.072	0.355759	0.414194
39.516	0.367243	0.371079
39.96	0.358148	0.30821
40.404	0.342707	0.234858
40.848	0.356727	0.179674
41.292	0.369054	0.130934
41.736	0.378727	0.0769643
42.18	0.380921	0.0503545
42.624	0.355853	0.0398048
43.068	0.367984	0.0286051
43.512	0.379544	0.0140291
43.956	0.363102	0.00248814
44.4	0.344128	0
44.844	0.319376	0
45.288	0.26832	0
45.732	0.209107	0
46.176	0.161169	0
46.62	0.106383	0
47.064	0.0549122	0
47.508	0.0378226	0
47.952	0.0223716	0
48.396	0.024454	0
48.84	0.0272893	0
49.284	0.0377247	0
49.728	0.0566455	0
50.172	0.0701632	0
50.616	0.0761448	0
51.06	0.079027	0
51.504	0.0801576	0
51.948	0.0864257	0
52.392	0.0940655	0
52.836	0.0872218	0
53.28	0.0935931	0
53.724	0.0909407	0
54.168	0.0779342	0
54.612	0.0673273	0
55.056	0.0527275	0
55.5	0.0245133	0
55.944	0.00437359	0
56.388	0	0
56.832	0	0
57.276	0	0
57.72	0	0
58.164	0	0
58.608	0	0
59.052	0	0
59.496	0	0
59.94	0	0
60.384	0	0
60.828	0	0
