# Supplementary material for: FluoEM, virtual labeling of axons in three-dimensional electron microscopy data for long-range connectomics
Source: eLife journal article supplement (doi:10.7554/elife.38976), 2018-08-14
Supplement: supp [file elife-38976-supp-v1.zip › elife_poa_e38976_Figure_6_source_data_1.xlsx]

## Sheet: Sheet1
sample_err_at	sample_err_FT
731.283	840.752
911.971	192.219
843.677	355.862
1815.8	310.96
373.791	878.378
1128.03	1164.18
509.913	462.397
1016.99	570.791
1489	448.309
1085.28	295.776
313.992	319.316
905.577	601.367
1236.29	1156.38
864.63	394.519
398.664	416.764
296.558	224.377
513.5	247.304
534.198	687.166
457.113	652.17
415.715	193.868
1413.72	381.494
293.745	608.797
459.731	387.743
644.222	936.643
800.118	138.632
781.022	674.729
571.236	219.527
658.454	608.605
178.109	112.4
121.579	125.724
