# Supplementary material for: FluoEM, virtual labeling of axons in three-dimensional electron microscopy data for long-range connectomics
Source: eLife journal article supplement (doi:10.7554/elife.38976), 2018-08-14
Supplement: supp [file elife-38976-supp-v1.zip › elife_poa_e38976_Figure_6_source_data_2.xlsx]

## Sheet: Sheet1
num_cp	mean_err_AT_it_01	mean_err_AT_it_02	mean_err_AT_it_03	mean_err_AT_it_04	mean_err_AT_it_05	mean_err_AT_it_06	mean_err_AT_it_07	mean_err_AT_it_08	mean_err_AT_it_09	mean_err_AT_it_10	mean_err_FT_it_01	mean_err_FT_it_02	mean_err_FT_it_03	mean_err_FT_it_04	mean_err_FT_it_05	mean_err_FT_it_06	mean_err_FT_it_07	mean_err_FT_it_08	mean_err_FT_it_09	mean_err_FT_it_10
5	2969.95	1322.8	1005	1119.08	2620.76	1593.82	939.569	1465.22	929.818	976.865	2975.58	1354.69	1002.5	1122.45	2619.67	1572.87	901.453	1442.73	799.2	971.4
10	829.854	794.492	933.251	1181.16	874.244	1055.57	1069.75	1037.39	767.569	1081.12	666.376	807.106	928.399	1222.56	830.653	1004.36	1070.35	1002.44	746.041	1100.66
25	829.366	847.465	922.633	803.395	1003.34	971.937	813.133	687.419	844.62	664.256	752.219	618.918	710.519	756.035	849.721	897.568	748.685	750.92	775.031	561.215
50	603.605	732.616	751.511	709.083	756.497	600.675	790.4	775.553	1066.16	730.455	542.024	623.114	518.19	571.09	553.93	537.14	541.987	722.502	839.395	588.698
75	742.818	740.249	691.769	792.809	906.087	832.851	847.998	699.355	929.339	1074.82	682.089	516.432	475.471	618.428	584.861	718.367	590.276	553.836	645.221	594.373
100	839.613	864.899	796.715	744.383	710.686	827.498	680.565	836.888	700.867	719.106	572.237	608.784	495.959	505.074	546.654	619.667	427.392	585.759	574.993	611.504
150	879.896	801.783	706.022	704.888	754.754	851.277	735.304	912.616	753.976	754.029	587.886	512.148	472.337	552.396	568.016	552.15	498.717	570.385	498.92	477.153
200	952.278	780.665	705.328	780.028	674.285	749.277	637.324	773.788	681.184	746.524	655.174	548.208	442.18	522.221	466.076	429.965	521.596	497.587	428.211	472.357
250	948.156	682.151	745.226	973.296	647.997	662.56	595.733	771.365	725.464	822.752	574.56	480.74	410.553	440.322	526.816	437.468	407.738	502.503	486.905	574.267
