# Supplementary material for: FluoEM, virtual labeling of axons in three-dimensional electron microscopy data for long-range connectomics
Source: eLife journal article supplement (doi:10.7554/elife.38976), 2018-08-14
Supplement: supp [file elife-38976-supp-v1.zip › elife_poa_e38976_Figure_6_source_data_3.xlsx]

## Sheet: Sheet1
CPkeys	CPnClass1_lm	CPnClass2_lm	CPns_lm	CPidx_lm	CPs_lm_1	CPs_lm_2	CPs_lm_3	CPsR_lm_1	CPsR_lm_2	CPsR_lm_3	color_lm	FWHMR2min_lm	ellipsoidVols_lm	CPnClass1_em_mergerMode	CPnClass2_em_mergerMode	CPns_em_mergerMode	CPidx_em_mergerMode	CPs_em_mergerMode_1	CPs_em_mergerMode_2	CPs_em_mergerMode_3	CPsR_em_mergerMode_1	CPsR_em_mergerMode_2	CPsR_em_mergerMode_3	mergerVols_em_mergerMode	sphere_diameter_lm	sphere_diameter_em	diaRatios
angelo_001	v		v1	299	4561	400	75	474344	41600	33300	red	0.931876	275615190	v		v1	299	17062	18096	716	191777	203399	21480	1.76772e+07	0.807424	0.3232	2.49822
angelo_002	v		v2	278	4582	406	74	476528	42224	32856	red	0.938156	447114723	v		v2	314	17219	18155	695	193542	204062	20850	4.53982e+07	0.948725	0.442602	2.14352
angelo_004	v		v4	221	4664	425	73	485056	44200	32412	red	0.980504	230471396	v		v4	274	18046	18410	630	202837	206928	18900	4.06567e+07	0.760687	0.426623	1.78304
angelo_005	v		v5	115	4704	426	72	489216	44304	31968	red	0.980277	215144142	v		v5	263	18437	18448	600	207232	207356	18000	2.49694e+07	0.743436	0.362635	2.0501
angelo_006	v		v6	238	4761	430	72	495144	44720	31968	red	0.905243	270193314	v		v6	251	18995	18518	560	213504	208142	16800	6.33823e+07	0.802094	0.494679	1.62144
angelo_007	v		v7	175	4875	466	69	507000	48464	30636	red	0.943767	128711863	v		v7	218	20080	18953	488	225699	213032	14640	2.37906e+07	0.626431	0.356836	1.75551
angelo_008	v		v8	179	4931	471	67	512824	48984	29748	red	0.982427	183524606	v		v8	317	20619	19030	450	231758	213897	13500	1.83859e+07	0.705069	0.327463	2.15313
angelo_009	v		v9	123	4942	472	66	513968	49088	29304	red	0.895409	246213471	v		v9	201	20737	19052	424	233084	214144	12720	3.34934e+07	0.777627	0.399933	1.94439
angelo_010	v		v10	288	4980	481	65	517920	50024	28860	red	0.940897	226107751	m		m10	319	21128	19182	393	237479	215606	11790	2.83805e+07	0.755856	0.378449	1.99725
angelo_011	v		v11	290	5010	490	66	521040	50960	29304	red	0.986105	301352966	v		v11	1	21408	19278	394	240626	216685	11820	7.15462e+07	0.831813	0.515066	1.61496
angelo_012	v		v12	204	5053	501	65	525512	52104	28860	red	0.983266	125045905	v		v12	13	21824	19416	366	245302	218236	10980	1.1124e+07	0.620426	0.276963	2.24011
angelo_014	v		v14	369	5099	511	65	530296	53144	28860	red	0.973809	194522125	v		v14	27	22281	19555	353	250438	219798	10590	2.69971e+07	0.718881	0.372197	1.93145
angelo_016	v		v16	161	5199	513	63	540696	53352	27972	red	0.869261	446776656	m		m16	53	23211	19630	303	260892	220641	9090	9.08569e+07	0.948485	0.557767	1.7005
angelo_017	v		v17	297	5234	519	61	544336	53976	27084	red	0.980416	212899368	v		v17	63	23580	19726	272	265039	221720	8160	4.78921e+07	0.740841	0.450562	1.64426
angelo_019	v		v19	61	5300	544	59	551200	56576	26196	red	0.877607	250865862	v		v19	78	24175	20017	213	271727	224991	6390	4.84985e+07	0.782494	0.452456	1.72944
angelo_023	v		v23	98	5372	566	59	558688	58864	26196	red	0.969463	225746873	v		v23	94	24920	20301	183	280101	228183	5490	3.31181e+07	0.755453	0.398433	1.89606
angelo_025	v		v25	65	5403	580	60	561912	60320	26640	red	0.98424	230968161	v		v25	307	25208	20456	209	283338	229925	6270	4.17066e+07	0.761233	0.430264	1.76922
antonio_002	v		v2	250	4587	608	69	477048	63232	30636	red	0.948207	601983252	v		v2	1	17147	20223	565	192732	227307	16950	2.03693e+08	1.0476	0.730005	1.43506
antonio_003	v		v3	158	4689	638	71	487656	66352	31524	red	0.979674	276597630	v		v3	48	18126	20579	593	203736	231308	17790	4.72212e+07	0.808382	0.448449	1.80262
antonio_004	v		v4	85	4769	644	70	495976	66976	31080	red	0.978318	386228586	b		b4	69	18923	20687	564	212695	232522	16920	1.25935e+08	0.903543	0.621893	1.45289
antonio_005	v		v5	25	4880	703	70	507520	73112	31080	red	0.992178	387648378	b		b5	110	19965	21366	563	224407	240154	16890	8.49443e+07	0.904648	0.545396	1.6587
antonio_006	v		v6	37	4950	718	71	514800	74672	31524	red	0.958421	342073408	v		v6	127	20679	21548	542	232432	242200	16260	9.06712e+07	0.867708	0.557387	1.55674
antonio_007	v		v7	257	5019	729	71	521976	75816	31524	red	0.920033	283372068	v		v7	144	21349	21711	545	239963	244032	16350	7.07882e+07	0.814928	0.51324	1.58781
antonio_008	v		v8	100	5056	745	71	525824	77480	31524	red	0.965698	741434340	b	m	bm8	157	21655	21864	534	243402	245751	16020	1.66398e+08	1.12294	0.682417	1.64554
antonio_009	v		v9	16	5119	766	71	532376	79664	31524	red	0.93841	381983052	m		m9	399	22318	22156	524	250854	249033	15720	2.14483e+08	0.90022	0.742674	1.21213
antonio_010	v		v10	230	5354	848	71	556816	88192	31524	red	0.981151	247230089	b		b10	255	24526	23149	525	275672	260195	15750	9.33774e+07	0.778695	0.562878	1.38342
antonio_011	v		v11	180	5441	872	72	565864	90688	31968	red	0.811275	393077810	b		b11	291	25359	23460	559	285035	263690	16770	1.47948e+08	0.908852	0.6562	1.38502
antonio_012	v		v12	244	5474	886	73	569296	92144	32412	red	0.882188	713429235	b		b12	302	25668	23628	559	288508	265579	16770	1.58022e+08	1.10862	0.670769	1.65277
antonio_013	v		v13	55	5605	976	74	582920	101504	32856	red	0.973819	407545150	b		b13	347	26863	24623	590	301940	276763	17700	2.4513e+08	0.919868	0.776485	1.18466
brain_002	v		v2	125	4613	712	70	479752	74048	31080	red	0.977416	389516862	b		b2	329	17349	21293	556	195003	239333	16680	1.09209e+08	0.906099	0.593043	1.52788
brain_005	v		v5	136	4781	749	60	497224	77896	26640	red	0.881205	295369308	v		v5	157	18945	21772	335	212942	244717	10050	4.54057e+07	0.826271	0.442626	1.86674
brain_006	v		v6	92	4804	760	61	499616	79040	27084	red	0.893515	2998664687	b		b6	150	19175	21895	367	215527	246100	11010	8.98344e+08	1.78913	1.19715	1.4945
brain_008	v		v8	200	5007	821	58	520728	85384	25752	red	0.956239	966719861	b		b8	349	21149	22633	240	237715	254395	7200	2.21624e+08	1.22678	0.750826	1.63391
brain_009	v		v9	124	5041	807	58	524264	83928	25752	red	0.887605	742237546	b		b9	77	21503	22502	243	241694	252922	7290	2.0862e+08	1.12335	0.735844	1.52661
brain_010	v		v10	8	5113	747	58	531752	77688	25752	red	0.96203	567147906	b		b10	338	22238	21948	228	249955	246696	6840	2.35128e+08	1.02699	0.765776	1.34111
brain_011	v		v11	238	5156	727	61	536224	75608	27084	red	0.990352	324729202	b		b11	27	22646	21792	282	254541	244942	8460	1.13169e+08	0.852788	0.600127	1.42101
brain_012	v		v12	91	5274	717	66	548496	74568	29304	red	0.967115	585364676	b		b12	343	23845	21763	415	268018	244616	12450	1.72371e+08	1.03787	0.690487	1.5031
brain_013	v		v13	251	5312	695	70	552448	72280	31080	red	0.97303	737547675	b		b13	347	24236	21560	512	272413	242334	15360	2.21124e+08	1.12098	0.750261	1.49412
brain_014	v		v14	273	5472	690	80	569088	71760	35520	red	0.919316	605412319	b	m	bm14	224	25802	21647	695	290014	243312	20850	1.5328e+08	1.04958	0.663992	1.58072
brendan_002	v		v2	137	5170	1082	74	537680	112528	32856	red	0.952151	861614654	b		b2	1	22548	25358	721	253440	285024	21630	3.41464e+08	1.18061	0.867192	1.36141
brendan_003	v		v3	74	5186	1071	76	539344	111384	33744	red	0.974851	248502136	b		b3	18	22729	25258	734	255474	283900	22020	1.99546e+08	0.780029	0.725017	1.07588
brendan_004	v		v4	225	5197	982	87	540488	102128	38628	red	0.954549	1103655365	b	m	bm4	46	22912	24379	946	257531	274020	28380	6.41661e+08	1.28217	1.07013	1.19814
brendan_005	v		v5	184	5215	954	89	542360	99216	39516	red	0.856649	483004123	b		b5	55	23078	24147	955	259397	271412	28650	3.09096e+08	0.973458	0.838877	1.16043
brendan_006	v		v6	157	5222	889	90	543088	92456	39960	red	0.98466	328315695	b		b6	70	23176	23488	986	260498	264005	29580	1.89127e+08	0.855916	0.712173	1.20184
brendan_007	v		v7	155	5225	841	91	543400	87464	40404	red	0.974819	346748905	b		b7	81	23246	23007	1019	261285	258599	30570	1.23422e+08	0.871643	0.617729	1.41105
brendan_008	v		v8	179	5261	828	92	547144	86112	40848	red	0.953303	206812209	b		b8	296	23585	22906	1021	265095	257463	30630	1.38222e+08	0.733712	0.641495	1.14375
brendan_009	v		v9	298	5272	751	103	548288	78104	45732	red	0.992894	249746554	b		b9	341	23797	22146	1270	267478	248921	38100	4.14185e+07	0.781328	0.429271	1.82013
brendan_010	v		v10	265	5233	712	115	544232	74048	51060	red	0.985013	276692090	b		b10	367	23401	21745	1537	263027	244414	46110	1.84026e+08	0.808474	0.705711	1.14562
brendan_011	v		v11	63	5226	676	124	543504	70304	55056	red	0.917506	194078644	b		b11	384	23357	21396	1737	262533	240491	52110	1.63938e+08	0.718334	0.679038	1.05787
brendan_012	v		v12	126	5218	642	134	542672	66768	59496	red	0.99004	251215761	b		b12	400	23302	21060	1957	261914	236714	58710	2.34363e+08	0.782858	0.764944	1.02342
brendan_013	v		v13	102	5261	767	95	547144	79768	42180	red	0.982573	392073636	b		b13	104	23644	22285	1106	265759	250483	33180	2.73318e+08	0.908078	0.805174	1.1278
brendan_014	v		v14	82	5261	632	102	547144	65728	45288	red	0.970824	185001063	b		b14	437	23768	20940	1224	267152	235366	36720	6.41328e+07	0.706955	0.496623	1.42352
brendan_015	v		v15	24	5422	293	115	563888	30472	51060	red	0.892462	776541882	b	m	bm15	231	25535	17662	1478	287013	198521	44340	9.02274e+08	1.1404	1.19889	0.951208
brendan_016	v		v16	97	5448	298	128	566592	30992	56832	red	0.97471	228627989	b		b16	258	25758	17760	1768	289520	199622	53040	2.3224e+08	0.758654	0.762628	0.994788
buster_001	v		v1	14	4603	399	99	478712	41496	43956	red	0.939529	431067029	b		b1	16	17469	18151	1233	196352	204017	36990	1.32738e+08	0.937235	0.632896	1.48087
buster_002	v		v2	92	4604	455	98	478816	47320	43512	red	0.984787	456667178	b		b2	9	17419	18694	1222	195790	210121	36660	1.03743e+08	0.955433	0.58298	1.63888
buster_003	v		v3	188	4620	506	97	480480	52624	43068	red	0.90115	794469684	b		b3	1	17555	19231	1187	197318	216156	35610	4.01303e+08	1.1491	0.915147	1.25565
buster_004	v		v4	30	4630	587	97	481520	61048	43068	red	0.984849	198092091	m		m4	37	17606	20076	1186	197891	225654	35580	5.29253e+07	0.723252	0.465824	1.55263
buster_005	v		v5	75	4633	604	97	481832	62816	43068	red	0.982439	473628718	b		b5	40	17618	20254	1195	198026	227655	35850	1.40341e+08	0.967119	0.644756	1.49998
buster_006	v		v6	178	4646	650	100	483184	67600	44400	red	0.905408	633441142	b		b6	49	17715	20700	1244	199117	232668	37320	2.42887e+08	1.06554	0.774108	1.37647
buster_007	v		v7	82	4656	677	102	484224	70408	45288	red	0.97832	350527141	v		v7	54	17783	20985	1289	199881	235871	38670	6.56905e+07	0.874798	0.500612	1.74746
buster_008	v		v8	8	4667	724	106	485368	75296	47064	red	0.809221	407743915	v		v8	64	17849	21452	1386	200623	241120	41580	8.01309e+07	0.920018	0.534893	1.72
buster_009	v		v9	172	4721	831	108	490984	86424	47952	red	0.933778	701339580	b		b9	83	18287	22557	1433	205546	253541	42990	1.80573e+08	1.10233	0.701269	1.5719
buster_010	v		v10	16	4760	862	108	495040	89648	47952	red	0.990009	546990321	b		b10	190	18655	22894	1443	209682	257329	43290	1.98004e+08	1.01468	0.723144	1.40314
buster_011	v		v11	164	4781	898	109	497224	93392	48396	red	0.961347	527961108	b		b11	185	18853	23278	1474	211908	261645	44220	1.54618e+08	1.00277	0.665918	1.50585
buster_012	v		v12	102	4825	971	112	501800	100984	49728	red	0.977555	205339803	v		v12	104	19225	24000	1550	216089	269760	46500	5.21787e+07	0.731967	0.463623	1.5788
buster_013	v		v13	68	4896	1041	112	509184	108264	49728	red	0.933253	978358524	b	m	bm13	183	19894	24785	1550	223609	278583	46500	6.79869e+08	1.23169	1.09096	1.12899
cletus_004	v		v4	14	4621	546	103	480584	56784	45732	green	0.971531	384042469	b		b4	125	17541	19646	1295	197161	220821	38850	1.47118e+08	0.901835	0.654971	1.37691
cletus_005	v		v5	90	4635	517	100	482040	53768	44400	green	0.986361	818330498	b		b5	121	17734	19374	1256	199330	217764	37680	2.56504e+08	1.1605	0.788313	1.47212
cletus_006	v		v6	80	4709	336	99	489736	34944	43956	green	0.960405	842577750	b	m	bm6	106	18565	17591	1175	208671	197723	35250	3.21202e+08	1.17185	0.849689	1.37915
clinton_002	v		v2	135	5708	731	72	593632	76024	31968	green	0.743368	2352820347	v		v2	283	28046	22228	465	315237	249843	13950	2.72485e+09	1.65018	1.73293	0.952245
clinton_003	v		v3	131	4746	370	69	493584	38480	30636	green	0.968149	319014757	b		b3	277	18911	17912	498	212560	201331	14940	2.09029e+08	0.847756	0.736325	1.15133
colby_002	v		v2	125	4683	302	85	487032	31408	37740	green	0.95017	208966955	b		b2	149	18324	17196	868	205962	193283	26040	6.68048e+07	0.736252	0.503427	1.46248
colby_003	v		v3	3	4705	333	87	489320	34632	38628	green	0.759233	311803100	v		v3	139	18525	17526	905	208221	196992	27150	4.45605e+07	0.841319	0.439863	1.91268
colby_004	v		v4	13	4771	388	93	496184	40352	41292	green	0.98609	323903107	b		b4	119	19122	18134	1011	214931	203826	30330	9.26838e+07	0.852064	0.561481	1.51753
colby_005	v		v5	122	4809	416	94	500136	43264	41736	green	0.974151	311747183	b		b5	63	19468	18445	1019	218820	207322	30570	9.46812e+07	0.841269	0.565486	1.48769
colby_006	v		v6	215	4833	434	94	502632	45136	41736	green	0.933155	605282802	b		b6	57	19675	18616	1027	221147	209244	30810	3.18651e+08	1.04951	0.847434	1.23846
colby_007	v		v7	131	5013	597	92	521352	62088	40848	green	0.973153	417685540	b		b7	1	21318	20387	1032	239614	229150	30960	2.96343e+08	0.927435	0.827177	1.12121
colby_008	v		v8	78	5052	643	91	525408	66872	40404	green	0.957787	342186962	m		m8	86	21697	20879	968	243874	234680	29040	9.39421e+07	0.867804	0.564011	1.53863
colby_009	v		v9	51	5115	677	91	531960	70408	40404	green	0.984639	500207533	b		b9	102	22297	21279	979	250618	239176	29370	2.73302e+08	0.984881	0.805159	1.22321
colby_010	v		v10	189	5118	706	90	532272	73424	39960	green	0.986666	184666355	b		b10	293	22305	21571	945	250708	242458	28350	8.02598e+07	0.706529	0.53518	1.32017
colby_011	v		v11	220	5146	733	89	535184	76232	39516	green	0.939795	348489676	b		b11	114	22547	21863	940	253428	245740	28200	1.41194e+08	0.8731	0.646059	1.35142
colby_012	v		v12	115	5159	766	90	536536	79664	39960	green	0.978917	669666718	b		b12	179	22650	22226	971	254586	249820	29130	5.41185e+08	1.08548	1.01107	1.07359
colby_013	v		v13	157	5235	844	89	544440	87776	39516	green	0.882001	461377125	b		b13	209	23338	23035	951	262319	258913	28530	2.96221e+08	0.958707	0.827064	1.15917
colby_014	v		v14	79	5266	897	86	547664	93288	38184	green	0.980041	465383974	b		b14	225	23629	23588	874	265590	265129	26220	2.08124e+08	0.961474	0.73526	1.30767
colby_015	v		v15	200	5269	916	85	547976	95264	37740	green	0.927284	508468600	b		b15	229	23629	23768	882	265590	267152	26460	1.41209e+08	0.990274	0.646082	1.53274
colby_016	v		v16	129	5325	943	90	553800	98072	39960	green	0.920913	477974846	b		b16	247	24164	24132	961	271603	271244	28830	2.56076e+08	0.970068	0.787874	1.23125
colby_017	v		v17	254	5361	979	90	557544	101816	39960	green	0.952493	386113351	b		b17	256	24488	24499	973	275245	275369	29190	8.80864e+07	0.903453	0.552039	1.63657
daron_001	v		v1	298	4639	565	59	482456	58760	26196	red	0.969063	730243968	b	m	bm1	1	17687	19807	303	198802	222631	9090	3.99711e+08	1.11727	0.913936	1.22248
daron_002	v		v2	282	4683	591	61	487032	61464	27084	red	0.987937	354725029	b		b2	76	18107	20112	343	203523	226059	10290	1.3154e+08	0.878276	0.630986	1.39191
daron_003	v		v3	189	4694	578	61	488176	60112	27084	red	0.968428	449881167	m		m3	79	18235	19968	359	204961	224440	10770	1.39822e+08	0.950677	0.64396	1.4763
daron_004	v		v4	67	4786	567	65	497744	58968	28860	red	0.97696	482808618	b		b4	117	19145	19907	446	215190	223755	13380	7.30737e+07	0.973327	0.518705	1.87645
daron_005	v		v5	210	4848	575	66	504192	59800	29304	red	0.969089	413399245	b		b5	140	19755	20027	452	222046	225103	13560	1.54732e+08	0.924252	0.666081	1.3876
daron_006	v		v6	231	4903	588	71	509912	61152	31524	red	0.967441	634740585	b		b6	164	20309	20209	571	228273	227149	17130	3.98183e+08	1.06627	0.91277	1.16817
daron_007	v		v7	121	4922	585	72	511888	60840	31968	red	0.953106	255322839	v		v7	171	20489	20188	597	230296	226913	17910	5.60029e+07	0.787101	0.474683	1.65816
daron_008	v		v8	181	4942	588	73	513968	61152	32412	red	0.946589	405616387	v		v8	179	20676	20246	607	232398	227565	18210	3.68514e+07	0.918415	0.412875	2.22444
daron_009	v		v9	239	5323	685	79	553592	71240	35076	red	0.979802	253857786	b		b9	476	24335	21492	709	273525	241570	21270	7.00643e+07	0.785592	0.511485	1.53591
daron_010	v		v10	288	5354	693	81	556816	72072	35964	red	0.986184	429774266	b		b10	328	24653	21601	748	277100	242795	22440	1.16455e+08	0.936298	0.605881	1.54535
daron_011	v		v11	11	5472	707	90	569088	73528	39960	red	0.964688	375149020	b		b11	372	25802	21821	918	290014	245268	27540	1.17558e+08	0.894819	0.607787	1.47226
daron_012	v		v12	174	5505	716	91	572520	74464	40404	red	0.988828	549656491	b		b12	385	26118	21939	945	293566	246594	28350	2.83289e+08	1.01632	0.814849	1.24725
donald_001	v		v1	206	4923	1115	63	511992	115960	27972	red	0.983339	243521315	b		b1	188	20094	25504	513	225857	286665	15390	8.16583e+07	0.774782	0.538271	1.43939
donald_002	v		v2	150	4941	1086	65	513864	112944	28860	red	0.984822	176857432	v		v2	176	20273	25237	515	227869	283664	15450	2.43667e+07	0.696426	0.359694	1.93616
donald_005	v		v5	176	5072	904	64	527488	94016	28416	red	0.95305	200046482	m		m5	113	21706	23513	418	243975	264286	12540	7.74285e+07	0.725623	0.528811	1.37218
donald_006	v		v6	1	5175	768	60	538200	79872	26640	red	0.983804	188931539	v		v6	42	22815	22213	268	256441	249674	8040	2.29833e+07	0.711927	0.352754	2.0182
dwight_001	v		v1	83	5121	623	105	532584	64792	46620	green	0.96956	560418754	b		b1	22	22394	20740	1240	251709	233118	37200	2.12327e+08	1.02291	0.740177	1.38198
dwight_002	v		v2	176	5353	443	95	556712	46072	42180	green	0.977133	300296838	b		b2	213	24786	19082	1005	278595	214482	30150	1.49771e+08	0.83084	0.658885	1.26098
dwight_003	v		v3	137	5457	386	86	567528	40144	38184	green	0.966615	208750826	m		m3	173	25867	18582	790	290745	208862	23700	2.02999e+07	0.735998	0.338453	2.17459
dwight_004	v		v4	44	5496	401	85	571584	41704	37740	green	0.993485	351932190	b		b4	179	26222	18771	748	294735	210986	22440	1.89537e+08	0.875965	0.712686	1.2291
elwood_003	v		v3	5	4721	992	69	490984	103168	30636	red	0.906422	203573474	v		v3	108	18240	24166	613	205018	271626	18390	2.17174e+07	0.729862	0.346154	2.10849
freddy_001	v		v1	160	4643	565	53	482872	58760	23532	red	0.97073	796094916	b		b1	240	17734	19793	163	199330	222473	4890	3.42669e+08	1.14989	0.868211	1.32443
freddy_002	v		v2	45	4684	568	52	487136	59072	23088	red	0.935979	695115643	b	m	bm2	229	18141	19859	156	203905	223215	4680	2.06119e+08	1.09906	0.732891	1.49962
freddy_003	v		v3	22	4927	644	59	512408	66976	26196	red	0.961703	434222214	b		b3	1	20471	20769	273	230094	233444	8190	8.55697e+07	0.939517	0.546731	1.71843
freddy_004	v		v4	5	4992	670	62	519168	69680	27528	red	0.989111	309983278	b	m	bm4	30	21105	21102	326	237220	237186	9780	1.64348e+08	0.839679	0.679602	1.23554
freddy_005	v		v5	53	5101	698	61	530504	72592	27084	red	0.973232	508875469	b		b5	45	22156	21450	287	249033	241098	8610	1.43472e+08	0.990538	0.649515	1.52504
freddy_006	v		v6	233	5133	726	60	533832	75504	26640	red	0.986476	343842748	b		b6	52	22439	21759	280	252214	244571	8400	1.06472e+08	0.869201	0.588048	1.47811
freddy_007	v		v7	31	5202	761	60	541008	79144	26640	red	0.943388	422953607	b		b7	66	23068	22152	284	259284	248988	8520	4.99501e+07	0.931318	0.456926	2.03823
freddy_008	v		v8	168	5337	813	58	555048	84552	25752	red	0.984206	489614805	b		b8	95	24387	22771	200	274110	255946	6000	1.09838e+08	0.977879	0.59418	1.64576
freddy_009	v		v9	36	5474	885	58	569296	92040	25752	red	0.952294	1168476961	b		b9	123	25658	23595	184	288396	265208	5520	3.57466e+08	1.30679	0.880532	1.4841
freddy_010	v		v10	140	5560	920	59	578240	95680	26196	red	0.906564	438491326	b		b10	146	26477	24016	180	297601	269940	5400	1.36403e+08	0.942586	0.638668	1.47586
freddy_011	v		v11	198	5680	969	59	590720	100776	26196	red	0.901191	310966610	v		v11	171	27550	24590	240	309662	276392	7200	3.90876e+07	0.840566	0.421063	1.9963
hilario_003	v		v3	57	4622	934	96	480688	97136	42624	green	0.891292	992877886	b	m	bm3	224	17290	23519	1193	194340	264354	35790	6.614e+08	1.23775	1.08099	1.14501
hilario_004	v		v4	42	4657	800	60	484328	83200	26640	green	0.793019	2310964879	b	m	bm4	45	17673	22202	321	198645	249550	9630	1.6195e+09	1.64033	1.457	1.12583
hilario_008	v		v8	151	4739	857	60	492856	89128	26640	green	0.991759	203142505	b		b8	38	18461	22856	299	207502	256901	8970	1.48001e+08	0.729347	0.656279	1.11134
hilario_009	v		v9	168	4766	849	59	495664	88296	26196	green	0.878685	1134516587	b	m	bm9	1	18749	22789	298	210739	256148	8940	8.80651e+08	1.29401	1.18924	1.0881
hilario_010	v		v10	63	4883	881	57	507832	91624	25308	green	0.889511	583034027	b	m	bm10	131	19842	23151	280	223024	260217	8400	5.93659e+08	1.03649	1.04275	0.993998
hilario_011	v		v11	30	5194	1033	59	540176	107432	26196	green	0.774793	995526860	b	m	bm11	181	22765	24868	289	255879	279516	8670	6.90323e+08	1.23885	1.09652	1.1298
ismael_002	v		v2	169	5061	542	102	526344	56368	45288	green	0.984948	581041185	b		b2	139	21871	19897	1237	245830	223642	37110	2.27673e+08	1.03531	0.757596	1.36657
ismael_003	v		v3	28	5407	691	95	562328	71864	42180	green	0.94805	817143248	b		b3	50	25153	21623	1018	282720	243043	30540	1.81854e+08	1.15993	0.702924	1.65016
ismael_004	v		v4	165	5629	730	87	585416	75920	38628	green	0.922716	895275790	b		b4	276	27258	22168	775	306380	249168	23250	3.18356e+08	1.19578	0.847171	1.4115
jere_002	v		v2	20	4578	614	72	476112	63856	31968	red	0.719676	564952554	m		m2	1	17065	20278	629	191811	227925	18870	1.36884e+08	1.02566	0.639418	1.60406
jere_003	v		v3	25	4607	613	75	479128	63752	33300	red	0.791068	513150866	b		b3	21	17338	20292	681	194879	228082	20430	1.73091e+08	0.993304	0.691447	1.43656
jere_004	v		v4	37	4634	623	77	481936	64792	34188	red	0.973412	662100405	b		b4	32	17622	20398	739	198071	229274	22170	2.8808e+08	1.08137	0.819417	1.31968
jere_005	v		v5	34	4678	663	78	486512	68952	34632	red	0.931718	526051659	v		v5	44	18003	20838	748	202354	234219	22440	1.23964e+08	1.00156	0.618631	1.61899
johnny_002	v		v2	120	4613	615	60	479752	63960	26640	green	0.984199	376719626	b		b2	82	17401	20302	323	195587	228194	9690	1.37134e+08	0.896066	0.639807	1.40052
johnny_003	v		v3	108	4642	622	59	482768	64688	26196	green	0.951297	299725549	b		b3	72	17698	20392	308	198926	229206	9240	2.40775e+08	0.830313	0.771859	1.07573
johnny_004	v		v4	176	4748	682	59	493792	70928	26196	green	0.948592	397321482	b		b4	21	18680	21059	289	209963	236703	8670	6.06534e+07	0.912111	0.487475	1.87109
johnny_005	v		v5	140	4801	717	58	499304	74568	25752	green	0.993348	469264078	b		b5	116	19168	21458	278	215448	241188	8340	3.02202e+08	0.964139	0.832593	1.15799
johnny_006	v		v6	121	4946	802	58	514384	83408	25752	green	0.975526	390364710	b		b6	172	20547	22397	217	230948	251742	6510	1.68555e+08	0.906756	0.685352	1.32305
johnny_007	v		v7	104	4967	825	58	516568	85800	25752	green	0.935189	364347933	m		m7	182	20753	22656	221	233264	254653	6630	8.77945e+07	0.886147	0.551429	1.607
johnny_008	v		v8	28	5076	868	56	527904	90272	24864	green	0.97887	195278194	v		v8	218	21794	23141	211	244965	260105	6330	6.07861e+07	0.719811	0.48783	1.47554
johnny_009	v		v9	80	5122	880	55	532688	91520	24420	green	0.909108	210382646	v		v9	234	22224	23297	168	249798	261858	5040	4.85288e+07	0.737911	0.45255	1.63056
josef_003	v		v3	195	5182	263	76	538928	27352	33744	red	0.899996	478431017	v		v3	120	23244	17139	636	261263	192642	19080	2.93849e+07	0.970376	0.382861	2.53454
josef_004	v		v4	289	5196	288	75	540384	29952	33300	red	0.972781	427348325	v		v4	112	23360	17394	599	262566	195509	17970	5.6056e+07	0.934533	0.474833	1.96813
josef_005	v		v5	26	5204	304	76	541216	31616	33744	red	0.973291	562217102	v		v5	108	23427	17551	600	263319	197273	18000	3.76057e+07	1.024	0.415673	2.46349
josef_007	v		v7	76	5241	364	79	545064	37856	35076	red	0.952267	303733197	v		v7	92	23743	18177	665	266871	204309	19950	7.08299e+07	0.833997	0.513341	1.62465
josef_008	v		v8	246	5260	403	81	547040	41912	35964	red	0.8442	573626362	v		v8	146	23902	18612	719	268658	209199	21570	1.90317e+08	1.03088	0.713663	1.4445
josef_010	v		v10	111	5333	512	82	554632	53248	36408	red	0.930888	431036682	v		v10	56	24548	19742	744	275920	221900	22320	7.23043e+07	0.937214	0.516878	1.81322
josef_011	v		v11	236	5379	596	82	559416	61984	36408	red	0.948436	256615900	v		v11	29	24948	20634	743	280416	231926	22290	4.37419e+07	0.788427	0.437152	1.80355
josef_012	v		v12	88	5398	645	83	561392	67080	36852	red	0.871945	434586450	v		v12	13	25106	21151	772	282191	237737	23160	5.09166e+07	0.939779	0.459854	2.04365
josef_013	v		v13	78	5434	722	82	565136	75088	36408	red	0.936499	473943568	m		m13	157	25410	21956	747	285608	246785	22410	1.28493e+08	0.967333	0.626076	1.54507
josef_015	v		v15	20	5515	848	81	573560	88192	35964	red	0.954812	316092766	v		v15	196	26118	23294	729	293566	261825	21870	2.54848e+07	0.845159	0.365113	2.31479
josef_016	v		v16	192	5540	911	79	576160	94744	35076	red	0.941041	490059448	v		v16	214	26297	23928	698	295578	268951	20940	1.89734e+07	0.978175	0.330914	2.95598
josef_017	v		v17	313	5541	930	79	576264	96720	35076	red	0.89037	597877695	v		v17	220	26299	24121	703	295601	271120	21090	3.73896e+07	1.04521	0.414875	2.51934
josef_018	v		v18	170	5597	1022	78	582088	106288	34632	red	0.923708	603362905	v		v18	249	26772	25095	700	300917	282068	21000	7.62271e+07	1.0484	0.526062	1.99292
josef_019	v		v19	186	5614	1051	77	583856	109304	34188	red	0.877326	543023226	v		v19	258	26905	25389	691	302412	285372	20730	1.0109e+08	1.01222	0.577968	1.75134
judson_003	v		v3	141	4630	506	122	481520	52624	54168	red	0.764722	844633751	b	m	bm3	98	17641	19255	1744	198285	216426	52320	2.81864e+08	1.1728	0.81348	1.4417
judson_004	v		v4	25	4644	646	106	482976	67184	47064	red	0.890503	1082403697	b	m	bm4	122	17706	20667	1393	199015	232297	41790	3.08145e+08	1.27388	0.838016	1.52012
judson_005	v		v5	7	4606	685	103	479024	71240	45732	red	0.96797	374017463	b		b5	119	17275	21039	1309	194171	236478	39270	8.75482e+07	0.893918	0.550913	1.62261
judson_006	v		v6	64	4601	705	102	478504	73320	45288	red	0.956137	351269416	b		b6	47	17232	21219	1289	193688	238502	38670	7.81259e+07	0.875415	0.530394	1.6505
judson_007	v		v7	111	4617	716	97	480168	74464	43068	red	0.969178	983775184	b	m	bm7	174	17411	21374	1194	195700	240244	35820	4.77833e+08	1.23395	0.969972	1.27215
judson_008	v		v8	158	4655	772	81	484120	80288	35964	red	0.96887	248008254	m		m8	23	17718	21915	813	199150	246325	24390	8.84616e+07	0.779511	0.552822	1.41006
judson_009	v		v9	62	4738	824	77	492752	85696	34188	red	0.972538	476633599	b		b9	128	18488	22494	726	207805	252833	21780	1.46367e+08	0.96916	0.653855	1.48222
judson_010	v		v10	139	4739	815	73	492856	84760	32412	red	0.927459	289993080	b		b10	137	18493	22406	654	207861	251843	19620	2.36481e+08	0.821227	0.767243	1.07036
judson_011	v		v11	20	4834	869	81	502736	90376	35964	red	0.969362	258644339	v		v11	164	19396	22995	832	218011	258464	24960	4.56331e+07	0.790499	0.443364	1.78296
kenneth_001	v		v1	143	4613	334	97	479752	34736	43068	red	0.931281	763608450	b		b1	144	17597	17496	1182	197790	196655	35460	1.99224e+08	1.13403	0.724627	1.56498
kenneth_002	v		v2	113	4598	426	98	478192	44304	43512	red	0.950975	848614105	b	m	bm2	131	17401	18378	1204	195587	206569	36120	3.08353e+08	1.17464	0.838205	1.40137
kenneth_004	v		v4	193	4594	619	99	477776	64376	43956	red	0.953206	1250208705	b	m	bm4	1	17234	20374	1252	193710	229004	37560	6.6107e+08	1.33658	1.08081	1.23664
kenneth_005	v		v5	84	4589	675	100	477256	70200	44400	red	0.912348	269116650	v		v5	15	17137	20935	1252	192620	235309	37560	1.16433e+08	0.801027	0.605841	1.32217
kenneth_006	v		v6	21	4652	1062	96	483808	110448	42624	red	0.926545	1566569966	b	m	bm6	75	17510	24774	1260	196812	278460	37800	4.76412e+08	1.44095	0.969009	1.48704
kent_002	v		v2	157	4968	295	119	516672	30680	52836	red	0.950774	938879927	b		b2	260	21095	17371	1606	237108	195250	48180	4.21928e+08	1.21489	0.930565	1.30554
kent_003	v		v3	75	5150	340	117	535600	35360	51948	red	0.97638	371557067	v		v3	54	22873	17951	1522	257093	201769	45660	5.10189e+07	0.891954	0.460162	1.93835
kent_008	v		v8	145	5483	404	112	570232	42016	49728	red	0.979881	573829508	b		b8	266	26077	18797	1389	293105	211278	41670	1.64548e+08	1.03101	0.679879	1.51646
kent_009	v		v9	28	5500	405	112	572000	42120	49728	red	0.993136	425143469	b		b9	173	26259	18825	1377	295151	211593	41310	6.32724e+07	0.932923	0.494393	1.88701
kent_010	v		v10	104	5605	402	116	582920	41808	51504	red	0.978273	324376225	b		b10	300	27267	18870	1458	306481	212099	43740	1.15853e+08	0.852479	0.604834	1.40944
lionel_002	v		v2	8	4733	1096	62	492232	113984	27528	red	0.96708	430842389	b		b2	99	18253	25191	513	205164	283147	15390	4.68907e+08	0.937073	0.963894	0.972174
lionel_003	v		v3	6	4881	1058	70	507624	110032	31080	red	0.962597	1056177693	v	m	vm3	17	19752	24908	607	222012	279966	18210	5.2563e+08	1.26351	1.00129	1.26188
mack_003	v		v3	97	4822	897	56	501488	93288	24864	green	0.902891	1418686892	b	m	bm3	8	19262	23304	239	216505	261937	7170	4.90416e+08	1.39411	0.978413	1.42487
mack_005	v		v5	33	5081	1024	58	528424	106496	25752	green	0.965745	343165741	v		v5	43	21713	24747	281	244054	278156	8430	1.15265e+08	0.868631	0.60381	1.43858
mack_006	v		v6	19	5094	1027	58	529776	106808	25752	green	0.994229	398836479	v		v6	84	21860	24788	279	245706	278617	8370	1.20723e+08	0.913269	0.613193	1.48937
malcom_004	v		v4	29	4632	819	69	481728	85176	30636	red	0.853898	792947918	b		b4	68	17447	22395	546	196104	251720	16380	1.15929e+08	1.14837	0.604966	1.89824
modesto_001	v		v1	181	4621	413	55	480584	42952	24420	red	0.876987	540002873	b	m	bm1	214	17622	18255	216	198071	205186	6480	1.96037e+08	1.01034	0.720742	1.4018
modesto_002	v		v2	192	4644	428	55	482976	44512	24420	red	0.942355	275399719	v		v2	9	17841	18412	224	200533	206951	6720	6.47126e+07	0.807213	0.498116	1.62053
modesto_003	v		v3	188	4740	497	56	492960	51688	24864	red	0.966404	1079805627	b	m	bm3	5	18751	19152	210	210761	215268	6300	6.80229e+08	1.27286	1.09115	1.16653
modesto_004	v		v4	26	4756	526	57	494624	54704	25308	red	0.969185	631419787	b	m	bm4	33	18902	19475	216	212458	218899	6480	3.14312e+08	1.0644	0.843569	1.26179
modesto_005	v		v5	161	4859	621	57	505336	64584	25308	red	0.95616	321680769	v		v5	177	19819	20492	253	222766	230330	7590	4.69635e+07	0.850111	0.447631	1.89913
modesto_006	v		v6	134	4884	640	57	507936	66560	25308	red	0.977338	305086033	b		b6	203	20039	20702	243	225238	232690	7290	7.80198e+07	0.835233	0.530154	1.57545
modesto_007	v		v7	81	4938	679	59	513552	70616	26196	red	0.963491	284955279	v		v7	61	20573	21140	271	231241	237614	8130	5.49644e+07	0.816443	0.471731	1.73074
modesto_008	v		v8	185	5006	766	60	520624	79664	26640	red	0.918958	346426278	v		v8	204	21176	22061	282	238018	247966	8460	8.00551e+07	0.871373	0.534725	1.62957
modesto_010	v		v10	143	5135	919	62	534040	95576	27528	red	0.957831	322769583	b	m	bm10	243	22347	23727	360	251180	266691	10800	1.32605e+08	0.851069	0.632685	1.34517
modesto_011	v		v11	118	5230	1049	63	543920	109096	27972	red	0.975017	478490466	b		b11	134	23152	25085	411	260228	281955	12330	1.42823e+08	0.970417	0.648535	1.49632
nick_003	v		v3	60	4837	962	78	503048	100048	34632	red	0.923836	382525004	m		m3	112	19350	23939	787	217494	269074	23610	8.4933e+07	0.900645	0.545372	1.65143
nick_004	v		v4	57	5086	1041	78	528944	108264	34632	red	0.969612	1397881746	b	m	bm4	35	21750	24883	779	244470	279685	23370	1.06832e+09	1.38726	1.26833	1.09376
nick_006	v		v6	61	5114	1079	76	531856	112216	33744	red	0.969486	368295512	m		m6	96	21994	25289	733	247213	284248	21990	1.34948e+08	0.889336	0.636388	1.39747
orval_004	v		v4	14	4604	896	73	478816	93184	32412	red	0.969102	259857427	v		v4	53	17136	23128	669	192609	259959	20070	5.37175e+07	0.791733	0.468136	1.69124
orval_005	v		v5	8	4633	913	69	481832	94952	30636	red	0.980709	705665983	b		b5	110	17431	23317	571	195924	262083	17130	5.37637e+08	1.10459	1.00886	1.09489
orval_006	v		v6	74	4703	906	63	489112	94224	27972	red	0.970213	476413776	b	m	bm6	8	18081	23304	415	203230	261937	12450	2.43501e+08	0.969011	0.77476	1.25072
orval_007	v		v7	45	4761	865	59	495144	89960	26196	red	0.969302	374138344	b		b7	158	18685	22925	318	210019	257677	9540	1.86205e+08	0.894014	0.708486	1.26187
orval_008	v		v8	100	4781	864	58	497224	89856	25752	red	0.991915	501688772	m		m8	44	18886	22921	283	212279	257632	8490	2.29007e+08	0.985852	0.759073	1.29876
orval_009	v		v9	21	4826	887	55	501904	92248	24420	red	0.98286	616978056	m	v	mv9	138	19286	23194	212	216775	260701	6360	3.33076e+08	1.05623	0.860033	1.22812
orval_010	v		v10	118	4872	889	55	506688	92456	24420	red	0.986258	424308322	m	v	mv10	16	19764	23245	235	222147	261274	7050	2.08294e+08	0.932311	0.735461	1.26766
orval_011	v		v11	48	4889	887	55	508456	92248	24420	red	0.957056	621081389	b		b11	50	19932	23232	231	224036	261128	6930	3.51102e+08	1.05856	0.875276	1.2094
rogelio_003	v		v3	18	4660	974	100	484640	101296	44400	red	0.993983	373031204	b		b3	8	17624	23944	1309	198094	269131	39270	1.51446e+08	0.893132	0.661332	1.3505
rogelio_004	v		v4	10	4710	1023	94	489840	106392	41736	red	0.964769	489130392	b		b4	34	18081	24459	1199	203230	274919	35970	1.12139e+08	0.977557	0.5983	1.63389
rogelio_005	v		v5	86	4753	1079	89	494312	112216	39516	red	0.984268	426785075	b	m	bm5	56	18463	25037	1110	207524	281416	33300	1.62248e+08	0.934122	0.676696	1.38042
rogelio_006	v		v6	36	4782	1108	90	497328	115232	39960	red	0.983659	318591731	b		b6	45	18731	25352	1145	210536	284956	34350	5.01169e+07	0.847381	0.457434	1.85247
ron_001	v		v1	54	4776	1116	79	496704	116064	35076	red	0.968921	272595594	b		b1	114	18662	25417	902	209761	285687	27060	9.53028e+07	0.804464	0.566721	1.41951
ron_002	v		v2	52	4900	1071	76	509600	111384	33744	red	0.938817	249939211	v		v2	40	19903	25054	758	223710	281607	22740	7.43244e+07	0.781529	0.521648	1.49819
ron_003	v		v3	35	4929	1070	76	512616	111280	33744	red	0.992026	401490517	b		b3	158	20191	25062	768	226947	281697	23040	8.76619e+07	0.91529	0.551151	1.66069
ron_004	v		v4	33	5055	1085	76	525720	112840	33744	red	0.981793	413984656	b		b4	70	21409	25303	775	240637	284406	23250	1.58037e+08	0.924688	0.67079	1.37851
ron_005	v		v5	78	5077	1093	77	528008	113672	34188	red	0.968686	696770267	b		b5	37	21627	25397	789	243087	285462	23670	3.1596e+08	1.09993	0.845041	1.30162
rosendo_003	v		v3	185	4588	561	76	477152	58344	33744	red	0.959362	719801440	b		b3	236	17231	19762	724	193676	222125	21720	3.62492e+08	1.11191	0.88464	1.25691
rosendo_004	v		v4	213	4613	551	76	479752	57304	33744	red	0.953402	293136205	b		b4	160	17451	19661	721	196149	220990	21630	1.01841e+08	0.824183	0.579394	1.42249
rosendo_005	v		v5	146	4647	551	76	483288	57304	33744	red	0.961714	521952751	b		b5	263	17793	19688	715	199993	221293	21450	1.08299e+08	0.998951	0.591392	1.68915
rosendo_006	v		v6	80	4698	555	77	488592	57720	34188	red	0.968067	1171326872	b		b6	319	18284	19758	722	205512	222080	21660	5.61492e+08	1.30786	1.02356	1.27775
rosendo_007	v		v7	96	4751	562	78	494104	58448	34632	red	0.98265	459457756	m		m7	179	18795	19851	749	211256	223125	22470	1.40997e+08	0.957376	0.645758	1.48256
rosendo_008	v		v8	3	4838	555	76	503152	57720	33744	red	0.987254	693121668	b		b8	90	19667	19836	690	221057	222957	20700	3.93787e+08	1.098	0.909398	1.2074
rosendo_009	v		v9	171	4988	528	77	518752	54912	34188	red	0.967591	449771235	b		b9	218	21175	19654	677	238007	220911	20310	1.52556e+08	0.9506	0.662945	1.4339
rosendo_010	v		v10	173	5026	501	76	522704	52104	33744	red	0.992918	442396707	b		b10	185	21540	19418	661	242110	218258	19830	1.71541e+08	0.945376	0.689377	1.37135
rosendo_011	v		v11	20	5065	495	80	526760	51480	35520	red	0.966784	322470812	v		v11	191	21963	19373	751	246864	217753	22530	6.23173e+07	0.850806	0.491892	1.72966
rosendo_012	v		v12	74	5189	473	79	539656	49192	35076	red	0.992807	621426042	b		b12	343	23171	19245	679	260442	216314	20370	2.67875e+08	1.05876	0.799793	1.32379
rosendo_013	v		v13	148	5203	447	81	541112	46488	35964	red	0.962902	409952536	b		b13	373	23316	19003	720	262072	213594	21600	1.28372e+08	0.921676	0.625879	1.47261
rosendo_014	v		v14	137	5173	373	82	537992	38792	36408	red	0.889263	1242016063	b	m	bm14	142	23082	18232	752	259442	204928	22560	5.64111e+08	1.33365	1.02515	1.30093
rosendo_015	v		v15	118	5085	280	75	528840	29120	33300	red	0.937929	706588705	b	m	bm15	359	22299	17256	578	250641	193957	17340	2.14264e+08	1.10507	0.74242	1.48847
tony_002	v		v2	31	4697	646	55	488488	67184	24420	red	0.920699	371852531	b		b2	94	18187	20652	218	204422	232128	6540	1.65579e+08	0.89219	0.681296	1.30955
tony_003	v		v3	32	4722	649	55	491088	67496	24420	red	0.973258	368500511	b		b3	60	18447	20702	196	207344	232690	5880	1.57738e+08	0.889501	0.670366	1.32689
tony_004	v		v4	70	4861	636	55	505544	66144	24420	red	0.922357	658185415	b		b4	27	19805	20654	175	222608	232151	5250	2.14108e+08	1.07924	0.742241	1.45402
tony_005	v		v5	54	5027	602	56	522808	62608	24864	red	0.97012	547449196	b		b5	102	21495	20431	175	241604	229644	5250	1.55172e+08	1.01496	0.666711	1.52234
travis_001	v		v1	7	4756	291	64	494624	30264	28416	red	0.832722	374916253	v		v1	196	19015	17110	385	213729	192316	11550	4.22334e+07	0.894634	0.432068	2.07058
travis_002	v		v2	119	4775	321	64	496600	33384	28416	red	0.91304	263448390	v		v2	190	19201	17438	374	215819	196003	11220	3.34062e+07	0.795363	0.399585	1.99047
travis_004	v		v4	82	4851	464	62	504504	48256	27528	red	0.945989	283515760	v		v4	17	19850	18917	339	223114	212627	10170	4.25821e+07	0.815066	0.433254	1.88127
travis_005	v		v5	159	4862	479	62	505648	49816	27528	red	0.934472	208739303	v		v5	29	19939	19070	333	224114	214347	9990	1.86853e+07	0.735984	0.329231	2.23546
travis_006	v		v6	90	4884	523	61	507936	54392	27084	red	0.880351	318130856	v		v6	123	20135	19529	308	226317	219506	9240	6.06004e+07	0.846972	0.487333	1.73798
travis_007	v		v7	99	4939	649	62	513656	67496	27528	red	0.903777	500703318	v		v7	35	20611	20853	351	231668	234388	10530	4.50912e+07	0.985207	0.441602	2.23098
travis_008	v		v8	104	4961	683	62	515944	71032	27528	red	0.962225	277375728	v		v8	221	20798	21200	328	233770	238288	9840	4.99425e+07	0.809139	0.456903	1.77092
travis_010	v		v10	83	5042	795	61	524368	82680	27084	red	0.947957	402867593	v		v10	246	21506	22367	298	241727	251405	8940	4.52465e+07	0.916336	0.442109	2.07265
travis_012	v		v12	41	5112	902	60	531648	93808	26640	red	0.942054	164097822	v		v12	132	22111	23537	306	248528	264556	9180	2.54545e+07	0.679258	0.364968	1.86114
travis_018	v		v18	25	5209	1063	59	541736	110552	26196	red	0.95316	474978293	v		v18	20	22940	25220	324	257846	283473	9720	6.51978e+07	0.968036	0.499357	1.93856
van_003	v		v3	140	4905	688	70	510120	71552	31080	red	0.837331	369435412	b		b3	60	20238	21208	534	227475	238378	16020	7.55145e+07	0.890253	0.524418	1.6976
van_004	v		v4	3	5029	704	71	523016	73216	31524	red	0.97269	320124808	b		b4	42	21472	21472	540	241345	241345	16200	1.36138e+08	0.848738	0.638253	1.32978
van_005	v		v5	59	5209	726	72	541736	75504	31968	red	0.990643	897510189	b	m	bm5	44	23183	21825	573	260577	245313	17190	6.66358e+08	1.19678	1.08368	1.10436
van_006	v		v6	122	5257	719	72	546728	74776	31968	red	0.991151	494959486	b		b6	163	23665	21776	551	265995	244762	16530	3.51337e+08	0.981425	0.875471	1.12102
van_007	v		v7	66	5392	761	68	560768	79144	30192	red	0.953373	286387691	b		b7	88	24986	22295	431	280843	250596	12930	107544882	0.817809	0.590016	1.38608
young_003	v		v3	79	5017	315	65	521768	32760	28860	green	0.965912	299965156	b		b3	152	21607	17540	350	242863	197150	10500	1.70844e+08	0.830534	0.688441	1.2064
young_004	v		v4	137	4998	433	66	519792	45032	29304	green	0.855725	185210353	v		v4	244	21324	18720	383	239682	210413	11490	1.71693e+07	0.707222	0.320075	2.20955
young_005	v		v5	131	4956	493	64	515424	51272	28416	green	0.969245	444258169	b		b5	183	20877	19287	362	234657	216786	10860	2.37251e+08	0.9467	0.768074	1.23256
young_006	v		v6	109	4989	591	63	518856	61464	27972	green	0.982119	392449988	v		v6	185	21139	20306	349	237602	228239	10470	7.04623e+07	0.908368	0.512451	1.77259
young_008	v		v8	99	5004	641	63	520416	66664	27972	green	0.967263	87188487	v		v8	239	21257	20804	328	238929	233837	9840	3.02718e+07	0.550157	0.386675	1.42279
young_009	v		v9	51	5015	662	63	521560	68848	27972	green	0.937352	235064751	m		m9	220	21328	21033	327	239727	236411	9810	8.93333e+07	0.765708	0.554632	1.38057
young_010	v		v10	21	5029	675	63	523016	70200	27972	green	0.96554	255160081	v		v10	194	21484	21180	328	241480	238063	9840	3.22275e+07	0.786934	0.394829	1.9931
young_012	v		v12	138	5067	712	61	526968	74048	27084	green	0.944494	273086618	v		v12	34	21803	21568	282	245066	242424	8460	1.44972e+07	0.804947	0.302526	2.66076
young_013	v		v13	211	5091	737	59	529464	76648	26196	green	0.939493	1209148065	b	m	bm13	163	22039	21835	219	247718	245425	6570	4.84966e+08	1.32178	0.974775	1.35599
young_014	v		v14	233	5156	764	56	536224	79456	24864	green	0.984771	218294374	b		b14	147	22655	22143	152	254642	248887	4560	8.58502e+07	0.747047	0.547328	1.3649
young_015	v		v15	2	5289	794	57	550056	82576	25308	green	0.988993	288277726	b		b15	143	23897	22559	181	268602	253563	5430	8.14953e+07	0.819604	0.537912	1.52368
young_016	v		v16	226	5353	809	60	556712	84136	26640	green	0.941331	964073694	b	m	bm16	279	24546	22756	246	275897	255777	7380	3.24185e+08	1.22566	0.852311	1.43805
young_017	v		v17	86	5399	806	60	561496	83824	26640	green	0.967395	976901868	b	m	bm17	23	25003	22754	218	281034	255755	6540	4.92254e+08	1.23107	0.979633	1.25667
