# Supplementary material for: FluoEM, virtual labeling of axons in three-dimensional electron microscopy data for long-range connectomics
Source: eLife journal article supplement (doi:10.7554/elife.38976), 2018-08-14
Supplement: supp [file elife-38976-supp-v1.zip › elife_poa_e38976_Figure_6_source_data_4.xlsx]

## Sheet: Sheet1
kde_x	kde_y_bouton_scaled_relmax	kde_y_nonbouton_scaled_relmax	p_bouton_classbalanced	p_nonbouton_classbalanced
0	4.9834e-13	3.20682e-09	0.000155376	0.999845
0.01	1.01288e-12	5.54322e-09	0.00018269	0.999817
0.02	2.03855e-12	9.48806e-09	0.000214808	0.999785
0.03	4.06278e-12	1.60816e-08	0.000252572	0.999747
0.04	8.01793e-12	2.69911e-08	0.00029697	0.999703
0.05	1.56691e-11	4.48601e-08	0.000349165	0.999651
0.06	3.03227e-11	7.38339e-08	0.00041052	0.999589
0.07	5.81086e-11	1.20341e-07	0.000482632	0.999517
0.08	1.10271e-10	1.94243e-07	0.000567376	0.999433
0.09	2.07223e-10	3.10498e-07	0.000666946	0.999333
0.1	3.85631e-10	4.91545e-07	0.000783912	0.999216
0.11	7.10666e-10	7.70677e-07	0.000921282	0.999079
0.12	1.29695e-09	1.19673e-06	0.00108257	0.998917
0.13	2.34396e-09	1.84057e-06	0.00127188	0.998728
0.14	4.19517e-09	2.80383e-06	0.00149399	0.998506
0.15	7.43577e-09	4.23069e-06	0.00175449	0.998246
0.16	1.30522e-08	6.32339e-06	0.00205987	0.99794
0.17	2.26898e-08	9.36241e-06	0.00241764	0.997582
0.18	3.90633e-08	1.37324e-05	0.00283655	0.997163
0.19	6.66048e-08	1.99548e-05	0.00332668	0.996673
0.2	1.12472e-07	2.87289e-05	0.00389969	0.9961
0.21	1.88103e-07	4.09816e-05	0.00456897	0.995431
0.22	3.11577e-07	5.79283e-05	0.00534989	0.99465
0.23	5.11161e-07	8.11443e-05	0.00625997	0.99374
0.24	8.30581e-07	0.00011265	0.00731917	0.992681
0.25	1.33674e-06	0.000155006	0.00855006	0.99145
0.26	2.13089e-06	0.000211428	0.009978	0.990022
0.27	3.36459e-06	0.000285904	0.0116314	0.988369
0.28	5.26226e-06	0.000383339	0.0135415	0.986458
0.29	8.15249e-06	0.000509695	0.0157431	0.984257
0.3	1.25112e-05	0.000672158	0.0182733	0.981727
0.31	1.90199e-05	0.000879311	0.0211725	0.978828
0.32	2.86439e-05	0.00114131	0.0244829	0.975517
0.33	4.27351e-05	0.0014701	0.0282484	0.971752
0.34	6.31656e-05	0.0018796	0.0325133	0.967487
0.35	9.24986e-05	0.00238596	0.0373211	0.962679
0.36	0.000134204	0.00300781	0.0427127	0.957287
0.37	0.000192925	0.00376657	0.0487247	0.951275
0.38	0.000274806	0.00468675	0.0553871	0.944613
0.39	0.00038788	0.00579635	0.0627209	0.937279
0.4	0.000542532	0.00712732	0.0707356	0.929264
0.41	0.000752026	0.00871605	0.0794275	0.920572
0.42	0.00103311	0.0106039	0.0887777	0.911222
0.43	0.00140667	0.012838	0.098751	0.901249
0.44	0.00189846	0.0154715	0.109296	0.890704
0.45	0.00253983	0.0185646	0.120346	0.879654
0.46	0.00336849	0.0221853	0.13182	0.86818
0.47	0.00442924	0.0264092	0.143627	0.856373
0.48	0.00577463	0.0313205	0.155671	0.844329
0.49	0.00746555	0.0370116	0.167851	0.832149
0.5	0.00957161	0.0435832	0.18007	0.81993
0.51	0.0121714	0.0511428	0.192238	0.807762
0.52	0.0153524	0.0598038	0.204273	0.795727
0.53	0.0192107	0.0696831	0.216108	0.783892
0.54	0.0238504	0.0808984	0.227691	0.772309
0.55	0.0293826	0.0935645	0.238986	0.761014
0.56	0.0359243	0.107789	0.249972	0.750028
0.57	0.0435965	0.123668	0.260644	0.739356
0.58	0.0525222	0.141279	0.271011	0.728989
0.59	0.0628245	0.160677	0.281093	0.718907
0.6	0.0746241	0.181887	0.290919	0.709081
0.61	0.0880365	0.204903	0.300528	0.699472
0.62	0.103169	0.229674	0.309963	0.690037
0.63	0.120119	0.256111	0.319271	0.680729
0.64	0.13897	0.284076	0.328499	0.671501
0.65	0.15979	0.313385	0.337697	0.662303
0.66	0.182625	0.343809	0.34691	0.65309
0.67	0.207505	0.375074	0.356183	0.643817
0.68	0.23443	0.406867	0.365556	0.634444
0.69	0.263378	0.438843	0.375064	0.624936
0.7	0.294296	0.470632	0.384737	0.615263
0.71	0.327102	0.50185	0.394597	0.605403
0.72	0.361679	0.532108	0.404659	0.595341
0.73	0.397878	0.56102	0.414932	0.585068
0.74	0.435514	0.588221	0.425417	0.574583
0.75	0.474367	0.61337	0.436104	0.563896
0.76	0.514182	0.636164	0.44698	0.55302
0.77	0.554667	0.656339	0.458022	0.541978
0.78	0.595501	0.673685	0.469199	0.530801
0.79	0.636332	0.688042	0.480478	0.519522
0.8	0.676784	0.699303	0.491818	0.508182
0.81	0.716462	0.707416	0.503177	0.496823
0.82	0.754959	0.712379	0.514509	0.485491
0.83	0.791864	0.714236	0.525771	0.474229
0.84	0.826773	0.713072	0.53692	0.46308
0.85	0.859295	0.709006	0.547915	0.452085
0.86	0.889067	0.702185	0.558722	0.441278
0.87	0.915759	0.692775	0.569313	0.430687
0.88	0.939089	0.680958	0.579668	0.420332
0.89	0.958826	0.666922	0.589775	0.410225
0.9	0.974799	0.650859	0.599634	0.400366
0.91	0.986905	0.632961	0.609251	0.390749
0.92	0.995108	0.613415	0.618647	0.381353
0.93	0.99944	0.592406	0.62785	0.37215
0.94	1	0.570112	0.636897	0.363103
0.95	0.996949	0.546707	0.645837	0.354163
0.96	0.990505	0.52236	0.654721	0.345279
0.97	0.980929	0.497239	0.663611	0.336389
0.98	0.968521	0.47151	0.67257	0.32743
0.99	0.953605	0.445339	0.681661	0.318339
1	0.93652	0.418893	0.690948	0.309052
1.01	0.917607	0.392341	0.700491	0.299509
1.02	0.897199	0.365852	0.710343	0.289657
1.03	0.87561	0.339595	0.720545	0.279455
1.04	0.853133	0.313738	0.731129	0.268871
1.05	0.830026	0.288446	0.742107	0.257893
1.06	0.806515	0.263876	0.753477	0.246523
1.07	0.78279	0.240177	0.765215	0.234785
1.08	0.759003	0.217486	0.777277	0.222723
1.09	0.735272	0.195926	0.789598	0.210402
1.1	0.711685	0.175599	0.802094	0.197906
1.11	0.6883	0.156589	0.814663	0.185337
1.12	0.665155	0.138958	0.827191	0.172809
1.13	0.642269	0.122744	0.839553	0.160447
1.14	0.619646	0.107961	0.851621	0.148379
1.15	0.597283	0.094602	0.863269	0.136731
1.16	0.575172	0.0826352	0.874378	0.125622
1.17	0.553302	0.0720103	0.884841	0.115159
1.18	0.531663	0.0626589	0.894571	0.105429
1.19	0.510249	0.054498	0.9035	0.0964999
1.2	0.489055	0.0474331	0.911586	0.0884141
1.21	0.468081	0.0413618	0.91881	0.0811903
1.22	0.447331	0.0361773	0.925177	0.0748225
1.23	0.426814	0.0317719	0.930718	0.0692823
1.24	0.406543	0.0280399	0.935479	0.0645214
1.25	0.386531	0.0248804	0.939524	0.0604757
1.26	0.3668	0.0221999	0.942931	0.0570691
1.27	0.34737	0.0199133	0.945782	0.0542179
1.28	0.328265	0.0179459	0.948165	0.0518352
1.29	0.309511	0.0162334	0.950165	0.0498347
1.3	0.291137	0.0147224	0.951866	0.0481345
1.31	0.273173	0.01337	0.95334	0.0466597
1.32	0.255648	0.0121431	0.954655	0.0453454
1.33	0.238597	0.0110176	0.955862	0.0441383
1.34	0.222051	0.00997689	0.957001	0.0429987
1.35	0.206042	0.00901114	0.958098	0.0419019
1.36	0.190604	0.00811559	0.959161	0.0408393
1.37	0.175768	0.00728949	0.960179	0.0398208
1.38	0.161563	0.00653498	0.961124	0.038876
1.39	0.148017	0.00585604	0.961942	0.0380575
1.4	0.135155	0.00525763	0.962556	0.0374441
