# Supplementary material for: FluoEM, virtual labeling of axons in three-dimensional electron microscopy data for long-range connectomics
Source: eLife journal article supplement (doi:10.7554/elife.38976), 2018-08-14
Supplement: supp [file elife-38976-supp-v1.zip › elife_poa_e38976_Figure_6_source_data_5.xlsx]

## Sheet: Sheet1
ind	name	reconstruction_effort	time_effort_findmatch	time_effort_tree	time_effort_cps	time_effort_complete
1	henrietta	2	0.128045	0.0587641	0.2	0.386809
2	dianne	1	0.067705	0.0953861	0.3	0.463091
3	donald	2	0.0819883	0.0648495	0.2	0.346838
4	janis	1	0.07466	0.353674	1.13333	1.56167
5	sally	2	0.139698	0.143477	0.566667	0.849842
6	patsy	1	0.100858	0.192079	0.566667	0.859604
7	alfred	1	0.136278	0.180152	0.466667	0.783097
8	cathy	2	0.0816333	0.134696	0.333333	0.549663
9	francis	1	0.084145	0.165506	0.4	0.649651
10	carla	1	0.0610067	0.273734	0.5	0.83474
11	stuart	1	0.0610983	0.138663	0.4	0.599761
12	julie	1	0.0850767	0.0979853	0.4	0.583062
13	lynn	1	0.09662	0.196807	0.266667	0.560094
14	norman	1	0.067905	0.177517	0.333333	0.578755
15	blanche	1	0.05509	0.121622	0.433333	0.610045
