# Supplementary figures and images for: FluoEM, virtual labeling of axons in three-dimensional electron microscopy data for long-range connectomics
Source: eLife journal article supplement (doi:10.7554/elife.38976), 2018-08-14

x

y

z

xy

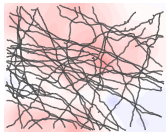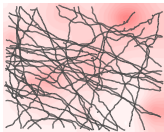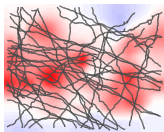

xz

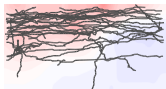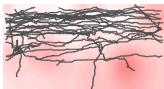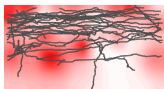

yz

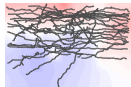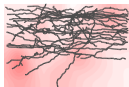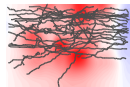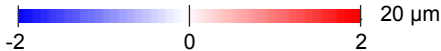

Maximum free-form deformation shift  
along cardinal direction ( $\mu\text{m}$ )

Supplement: supp [file elife-38976-supp-v1.zip]

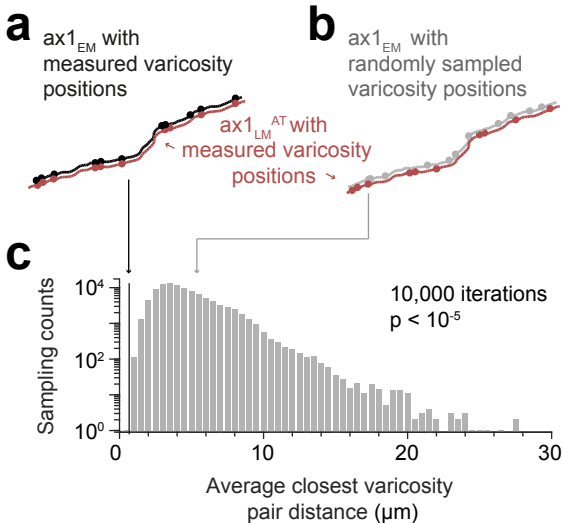

Supplement: supp [file elife-38976-supp-v1.zip]

$n_{\text{ax}} = 128$

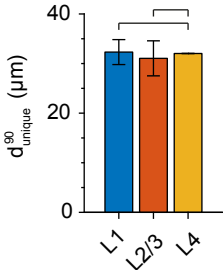

Supplement: supp [file elife-38976-supp-v1.zip]
